# Supplementary material for: Simultaneous microalgae separation and COD reduction from landfill leachate using electrocoagulation-flotation
Source: Research Square preprint supplement (doi:10.21203/rs.3.rs-8360370/v1), 2025-12-23
Supplement: Supplementary file 1 [file a6a77a6797bee6f5645650c0.xlsx]

## Sheet: Sheet1
Zeit (s)	Spannung_1 (V)	minutes		H1	V	H2	Spannung_3 (V)	H3	Spannung_Ser (V)	Strom_Ser (A)	Spannung_Par (V)	Strom_Par (A)	Leistung_1 (W)	Leistung_2 (W)	Leistung_3 (W)	Leistung_Ser (W)	Leistung_Par (W)	Energie_1 (J)	Energie_2 (J)	Energie_3 (J)	Energie_Ser (J)	Energie_Par (J)	sek	minutes
15	0	0.0166667		0	0	0.022	1.5	0.007	0	0	0	0	0	0	0.0105	0	0	0	0	0.0105	0	0	1	0.0166667
16	0	0.0333333		0	1.5	0.006	1.5	0.008	0	0	0	0	0	0.009	0.012	0	0	0	0.009	0.0225	0	0	2	0.0333333
17	1.5	0.05		0.007	1.5	0.004	1.5	0.01	0	0	0	0	0.0105	0.006	0.015	0	0	0.0105	0.015	0.0375	0	0	3	0.05
18	1.5	0.0666667		0.009	1.5	0.005	1.5	0.012	0	0	0	0	0.0135	0.0075	0.018	0	0	0.024	0.0225	0.0555	0	0	4	0.0666667
19	1.5	0.0833333		0.01	1.5	0.005	1.5	0.041	0	0	0	0	0.015	0.0075	0.0615	0	0	0.039	0.03	0.117	0	0	5	0.0833333
20	1.5	0.1		0.011	1.5	0.006	1.5	0.059	0	0	0	0	0.0165	0.009	0.0885	0	0	0.0555	0.039	0.2055	0	0	6	0.1
21	1.5	0.116667		0.012	1.5	0.006	1.5	0.064	0	0	0	0	0.018	0.009	0.096	0	0	0.0735	0.048	0.3015	0	0	7	0.116667
22	1.5	0.133333		0.012	3.49	0.015	1.5	0.071	0	0	0	0	0.018	0.05235	0.1065	0	0	0.0915	0.10035	0.408	0	0	8	0.133333
23	1.5	0.15		0.013	1.5	0.023	1.5	0.037	0	0	0	0	0.0195	0.0345	0.0555	0	0	0.111	0.13485	0.4635	0	0	9	0.15
24	1.5	0.166667		0.014	1.5	0.026	1.5	0.043	0	0	0	0	0.021	0.039	0.0645	0	0	0.132	0.17385	0.528	0	0	10	0.166667
25	1.5	0.183333		0.048	1.5	0.029	1.5	0.042	0	0	0	0	0.072	0.0435	0.063	0	0	0.204	0.21735	0.591	0	0	11	0.183333
26	1.5	0.2		0.057	1.5	0.031	1.5	0.043	0	0	0	0	0.0855	0.0465	0.0645	0	0	0.2895	0.26385	0.6555	0	0	12	0.2
27	1.5	0.216667		0.061	1.5	0.033	1.5	0.048	0	0	0	0	0.0915	0.0495	0.072	0	0	0.381	0.31335	0.7275	0	0	13	0.216667
28	1.5	0.233333		0.063	1.5	0.035	1.5	0.053	0	0	0	0	0.0945	0.0525	0.0795	0	0	0.4755	0.36585	0.807	0	0	14	0.233333
29	1.5	0.25		0.066	1.5	0.036	1.5	0.05	0	0	0	0	0.099	0.054	0.075	0	0	0.5745	0.41985	0.882	0	0	15	0.25
30	1.5	0.266667		0.067	1.5	0.038	1.5	0.057	0	0	0	0	0.1005	0.057	0.0855	0	0	0.675	0.47685	0.9675	0	0	16	0.266667
31	1.5	0.283333		0.069	1.5	0.039	1.5	0.06	0	0	0	0	0.1035	0.0585	0.09	0	0	0.7785	0.53535	1.0575	0	0	17	0.283333
32	1.5	0.3		0.071	1.5	0.041	1.5	0.059	0	0	0	0	0.1065	0.0615	0.0885	0	0	0.885	0.59685	1.146	0	0	18	0.3
33	1.5	0.316667		0.072	1.5	0.042	1.5	0.06	0	0	0	0	0.108	0.063	0.09	0	0	0.993	0.65985	1.236	0	0	19	0.316667
34	1.5	0.333333		0.073	1.5	0.044	1.5	0.062	0	0	0	0	0.1095	0.066	0.093	0	0	1.1025	0.72585	1.329	0	0	20	0.333333
35	1.5	0.35		0.075	1.5	0.046	1.5	0.061	0	0	0	0	0.1125	0.069	0.0915	0	0	1.215	0.79485	1.4205	0	0	21	0.35
36	1.5	0.366667		0.076	1.5	0.047	1.5	0.062	0	0	0	0	0.114	0.0705	0.093	0	0	1.329	0.86535	1.5135	0	0	22	0.366667
37	1.5	0.383333		0.077	1.5	0.049	1.5	0.065	0	0	0	0	0.1155	0.0735	0.0975	0	0	1.4445	0.93885	1.611	0	0	23	0.383333
38	1.5	0.4		0.079	1.5	0.051	1.5	0.06	0	0	0	0	0.1185	0.0765	0.09	0	0	1.563	1.01535	1.701	0	0	24	0.4
39	1.5	0.416667		0.08	1.5	0.052	1.5	0.061	0	0	0	0	0.12	0.078	0.0915	0	0	1.683	1.09335	1.7925	0	0	25	0.416667
40	1.5	0.433333		0.082	1.5	0.054	1.5	0.065	0	0	0	0	0.123	0.081	0.0975	0	0	1.806	1.17435	1.89	0	0	26	0.433333
41	1.5	0.45		0.084	1.5	0.056	1.5	0.065	0	0	0	0	0.126	0.084	0.0975	0	0	1.932	1.25835	1.9875	0	0	27	0.45
42	1.5	0.466667		0.085	1.5	0.058	1.5	0.067	0	0	0	0	0.1275	0.087	0.1005	0	0	2.0595	1.34535	2.088	0	0	28	0.466667
43	1.5	0.483333		0.086	1.5	0.06	1.5	0.069	0	0	0	0	0.129	0.09	0.1035	0	0	2.1885	1.43535	2.1915	0	0	29	0.483333
44	1.5	0.5		0.088	1.5	0.061	1.5	0.07	0	0	0	0	0.132	0.0915	0.105	0	0	2.3205	1.52685	2.2965	0	0	30	0.5
45	1.5	0.516667		0.089	1.5	0.063	1.5	0.069	0	0	0	0	0.1335	0.0945	0.1035	0	0	2.454	1.62135	2.4	0	0	31	0.516667
46	1.5	0.533333		0.09	1.5	0.065	1.5	0.07	0	0	0	0	0.135	0.0975	0.105	0	0	2.589	1.71885	2.505	0	0	32	0.533333
47	1.5	0.55		0.091	1.5	0.066	1.5	0.067	0	0	0	0	0.1365	0.099	0.1005	0	0	2.7255	1.81785	2.6055	0	0	33	0.55
48	1.5	0.566667		0.093	1.5	0.068	1.5	0.067	0	0	0	0	0.1395	0.102	0.1005	0	0	2.865	1.91985	2.706	0	0	34	0.566667
49	1.5	0.583333		0.094	1.5	0.07	1.5	0.064	0	0	0	0	0.141	0.105	0.096	0	0	3.006	2.02485	2.802	0	0	35	0.583333
50	1.5	0.6		0.095	1.5	0.071	1.5	0.055	0	0	0	0	0.1425	0.1065	0.0825	0	0	3.1485	2.13135	2.8845	0	0	36	0.6
51	1.5	0.616667		0.096	1.5	0.073	1.5	0.054	0	0	0	0	0.144	0.1095	0.081	0	0	3.2925	2.24085	2.9655	0	0	37	0.616667
52	1.5	0.633333		0.097	1.58	0.522	1.5	0.056	0	0	0	0	0.1455	0.82476	0.084	0	0	3.438	3.06561	3.0495	0	0	38	0.633333
53	1.5	0.65		0.098	1.5	0.108	1.5	0.057	0	0	0	0	0.147	0.162	0.0855	0	0	3.585	3.22761	3.135	0	0	39	0.65
54	1.5	0.666667		0.099	1.5	0.109	1.5	0.056	0	0	0	0	0.1485	0.1635	0.084	0	0	3.7335	3.39111	3.219	0	0	40	0.666667
55	1.5	0.683333		0.124	1.5	0.11	1.5	0.053	0	0	0	0	0.186	0.165	0.0795	0	0	3.9195	3.55611	3.2985	0	0	41	0.683333
56	1.5	0.7		0.125	1.5	0.11	1.5	0.056	0	0	0	0	0.1875	0.165	0.084	0	0	4.107	3.72111	3.3825	0	0	42	0.7
57	1.5	0.716667		0.125	1.5	0.112	1.5	0.054	0	0	0	0	0.1875	0.168	0.081	0	0	4.2945	3.88911	3.4635	0	0	43	0.716667
58	1.5	0.733333		0.124	1.5	0.113	1.5	0.054	0	0	0	0	0.186	0.1695	0.081	0	0	4.4805	4.05861	3.5445	0	0	44	0.733333
59	1.5	0.75		0.124	1.5	0.114	1.5	0.057	0	0	0	0	0.186	0.171	0.0855	0	0	4.6665	4.22961	3.63	0	0	45	0.75
60	1.5	0.766667		0.124	1.5	0.115	1.5	0.058	0	0	0	0	0.186	0.1725	0.087	0	0	4.8525	4.40211	3.717	0	0	46	0.766667
61	1.5	0.783333		0.124	1.5	0.117	1.5	0.056	0	0	0	0	0.186	0.1755	0.084	0	0	5.0385	4.57761	3.801	0	0	47	0.783333
62	1.5	0.8		0.124	1.5	0.118	1.5	0.054	0	0	0	0	0.186	0.177	0.081	0	0	5.2245	4.75461	3.882	0	0	48	0.8
63	1.5	0.816667		0.124	1.5	0.12	1.5	0.056	0	0	0	0	0.186	0.18	0.084	0	0	5.4105	4.93461	3.966	0	0	49	0.816667
64	1.5	0.833333		0.125	1.5	0.121	1.5	0.059	0	0	0	0	0.1875	0.1815	0.0885	0	0	5.598	5.11611	4.0545	0	0	50	0.833333
65	1.5	0.85		0.126	1.5	0.122	1.5	0.067	0	0	0	0	0.189	0.183	0.1005	0	0	5.787	5.29911	4.155	0	0	51	0.85
66	1.5	0.866667		0.126	1.5	0.123	1.5	0.062	0	0	0	0	0.189	0.1845	0.093	0	0	5.976	5.48361	4.248	0	0	52	0.866667
67	1.5	0.883333		0.127	1.5	0.125	1.5	0.07	0	0	0	0	0.1905	0.1875	0.105	0	0	6.1665	5.67111	4.353	0	0	53	0.883333
68	1.5	0.9		0.127	1.5	0.126	1.5	0.07	0	0	0	0	0.1905	0.189	0.105	0	0	6.357	5.86011	4.458	0	0	54	0.9
69	1.5	0.916667		0.128	1.5	0.128	1.5	0.07	0	0	0	0	0.192	0.192	0.105	0	0	6.549	6.05211	4.563	0	0	55	0.916667
70	1.5	0.933333		0.129	1.5	0.129	1.5	0.077	0	0	0	0	0.1935	0.1935	0.1155	0	0	6.7425	6.24561	4.6785	0	0	56	0.933333
71	1.5	0.95		0.129	1.5	0.13	1.5	0.073	0	0	0	0	0.1935	0.195	0.1095	0	0	6.936	6.44061	4.788	0	0	57	0.95
72	1.5	0.966667		0.13	1.5	0.132	1.5	0.078	0	0	0	0	0.195	0.198	0.117	0	0	7.131	6.63861	4.905	0	0	58	0.966667
73	1.5	0.983333		0.13	1.5	0.133	1.5	0.079	0	0	0	0	0.195	0.1995	0.1185	0	0	7.326	6.83811	5.0235	0	0	59	0.983333
74	1.5	1		0.131	1.5	0.134	1.5	0.08	0	0	0	0	0.1965	0.201	0.12	0	0	7.5225	7.03911	5.1435	0	0	60	1
75	1.5	1.01667		0.132	1.5	0.135	1.5	0.083	0	0	0	0	0.198	0.2025	0.1245	0	0	7.7205	7.24161	5.268	0	0	61	1.01667
76	1.5	1.03333		0.132	1.5	0.137	1.5	0.083	0	0	0	0	0.198	0.2055	0.1245	0	0	7.9185	7.44711	5.3925	0	0	62	1.03333
77	1.5	1.05		0.133	1.5	0.138	1.5	0.081	0	0	0	0	0.1995	0.207	0.1215	0	0	8.118	7.65411	5.514	0	0	63	1.05
78	1.5	1.06667		0.133	1.5	0.139	1.5	0.079	0	0	0	0	0.1995	0.2085	0.1185	0	0	8.3175	7.86261	5.6325	0	0	64	1.06667
79	1.5	1.08333		0.134	1.5	0.14	1.5	0.153	0	0	0	0	0.201	0.21	0.2295	0	0	8.5185	8.07261	5.862	0	0	65	1.08333
80	1.5	1.1		0.134	1.5	0.141	1.5	0.152	0	0	0	0	0.201	0.2115	0.228	0	0	8.7195	8.28411	6.09	0	0	66	1.1
81	1.5	1.11667		0.135	1.5	0.142	1.5	0.15	0	0	0	0	0.2025	0.213	0.225	0	0	8.922	8.49711	6.315	0	0	67	1.11667
82	1.5	1.13333		0.135	3.41	0.174	1.5	0.15	0	0	0	0	0.2025	0.59334	0.225	0	0	9.1245	9.09045	6.54	0	0	68	1.13333
83	1.5	1.15		0.135	1.5	0.172	1.5	0.15	0	0	0	0	0.2025	0.258	0.225	0	0	9.327	9.34845	6.765	0	0	69	1.15
84	1.5	1.16667		0.135	1.5	0.17	1.5	0.151	0	0	0	0	0.2025	0.255	0.2265	0	0	9.5295	9.60345	6.9915	0	0	70	1.16667
85	1.5	1.18333		0.16	1.5	0.168	1.5	0.151	0	0	0	0	0.24	0.252	0.2265	0	0	9.7695	9.85545	7.218	0	0	71	1.18333
86	1.5	1.2		0.16	1.5	0.167	1.5	0.151	0	0	0	0	0.24	0.2505	0.2265	0	0	10.0095	10.1059	7.4445	0	0	72	1.2
87	1.5	1.21667		0.162	1.5	0.166	1.5	0.152	0	0	0	0	0.243	0.249	0.228	0	0	10.2525	10.355	7.6725	0	0	73	1.21667
88	1.5	1.23333		0.162	1.5	0.165	1.5	0.152	0	0	0	0	0.243	0.2475	0.228	0	0	10.4955	10.6024	7.9005	0	0	74	1.23333
89	1.5	1.25		0.161	1.5	0.165	1.5	0.094	0	0	0	0	0.2415	0.2475	0.141	0	0	10.737	10.8499	8.0415	0	0	75	1.25
90	1.5	1.26667		0.16	1.5	0.165	1.5	0.08	0	0	0	0	0.24	0.2475	0.12	0	0	10.977	11.0975	8.1615	0	0	76	1.26667
91	1.5	1.28333		0.16	1.5	0.166	1.5	0.079	0	0	0	0	0.24	0.249	0.1185	0	0	11.217	11.3465	8.28	0	0	77	1.28333
92	1.5	1.3		0.159	1.5	0.166	1.5	0.031	0	0	0	0	0.2385	0.249	0.0465	0	0	11.4555	11.5954	8.3265	0	0	78	1.3
93	1.5	1.31667		0.158	1.5	0.167	1.5	0.059	0	0	0	0	0.237	0.2505	0.0885	0	0	11.6925	11.846	8.415	0	0	79	1.31667
94	1.5	1.33333		0.156	1.5	0.167	1.5	0.053	0	0	0	0	0.234	0.2505	0.0795	0	0	11.9265	12.0965	8.4945	0	0	80	1.33333
95	1.5	1.35		0.15	1.5	0.168	1.5	0.062	0	0	0	0	0.225	0.252	0.093	0	0	12.1515	12.3485	8.5875	0	0	81	1.35
96	1.5	1.36667		0.144	1.5	0.169	1.5	0.074	0	0	0	0	0.216	0.2535	0.111	0	0	12.3675	12.602	8.6985	0	0	82	1.36667
97	1.5	1.38333		0.142	1.5	0.169	1.5	0.101	0	0	0	0	0.213	0.2535	0.1515	0	0	12.5805	12.8555	8.85	0	0	83	1.38333
98	1.5	1.4		0.144	1.5	0.169	1.5	0.077	0	0	0	0	0.216	0.2535	0.1155	0	0	12.7965	13.109	8.9655	0	0	84	1.4
99	1.5	1.41667		0.147	1.5	0.171	1.5	0.075	0	0	0	0	0.2205	0.2565	0.1125	0	0	13.017	13.3655	9.078	0	0	85	1.41667
100	1.5	1.43333		0.149	1.5	0.171	1.5	0.073	0	0	0	0	0.2235	0.2565	0.1095	0	0	13.2405	13.622	9.1875	0	0	86	1.43333
101	1.5	1.45		0.152	1.5	0.172	1.5	0.068	0	0	0	0	0.228	0.258	0.102	0	0	13.4685	13.88	9.2895	0	0	87	1.45
102	1.5	1.46667		0.154	1.5	0.173	1.5	0.073	0	0	0	0	0.231	0.2595	0.1095	0	0	13.6995	14.1395	9.399	0	0	88	1.46667
103	1.5	1.48333		0.154	1.5	0.173	1.5	0.067	0	0	0	0	0.231	0.2595	0.1005	0	0	13.9305	14.399	9.4995	0	0	89	1.48333
104	1.5	1.5		0.154	1.5	0.174	1.5	0.068	0	0	0	0	0.231	0.261	0.102	0	0	14.1615	14.66	9.6015	0	0	90	1.5
105	1.5	1.51667		0.154	1.5	0.175	1.5	0.071	0	0	0	0	0.231	0.2625	0.1065	0	0	14.3925	14.9225	9.708	0	0	91	1.51667
106	1.5	1.53333		0.156	1.5	0.176	1.5	0.071	0	0	0	0	0.234	0.264	0.1065	0	0	14.6265	15.1865	9.8145	0	0	92	1.53333
107	1.5	1.55		0.157	1.5	0.177	1.5	0.072	0	0	0	0	0.2355	0.2655	0.108	0	0	14.862	15.452	9.9225	0	0	93	1.55
108	1.5	1.56667		0.157	1.5	0.177	1.5	0.075	0	0	0	0	0.2355	0.2655	0.1125	0	0	15.0975	15.7175	10.035	0	0	94	1.56667
109	1.5	1.58333		0.152	1.5	0.178	1.5	0.156	0	0	0	0	0.228	0.267	0.234	0	0	15.3255	15.9845	10.269	0	0	95	1.58333
110	1.5	1.6		0.152	1.5	0.178	1.5	0.153	0	0	0	0	0.228	0.267	0.2295	0	0	15.5535	16.2515	10.4985	0	0	96	1.6
111	1.5	1.61667		0.152	1.5	0.177	1.5	0.15	0	0	0	0	0.228	0.2655	0.225	0	0	15.7815	16.517	10.7235	0	0	97	1.61667
112	1.5	1.63333		0.152	1.5	0.858	1.5	0.149	0	0	0	0	0.228	1.287	0.2235	0	0	16.0095	17.804	10.947	0	0	98	1.63333
113	1.5	1.65		0.152	1.5	0.214	1.5	0.149	0	0	0	0	0.228	0.321	0.2235	0	0	16.2375	18.125	11.1705	0	0	99	1.65
114	1.5	1.66667		0.152	1.5	0.211	1.5	0.149	0	0	0	0	0.228	0.3165	0.2235	0	0	16.4655	18.4415	11.394	0	0	100	1.66667
115	1.5	1.68333		0.158	1.5	0.208	1.5	0.149	0	0	0	0	0.237	0.312	0.2235	0	0	16.7025	18.7535	11.6175	0	0	101	1.68333
116	1.5	1.7		0.164	1.5	0.205	1.5	0.149	0	0	0	0	0.246	0.3075	0.2235	0	0	16.9485	19.061	11.841	0	0	102	1.7
117	1.5	1.71667		0.165	1.5	0.203	1.5	0.15	0	0	0	0	0.2475	0.3045	0.225	0	0	17.196	19.3655	12.066	0	0	103	1.71667
118	1.5	1.73333		0.164	1.5	0.202	1.5	0.15	0	0	0	0	0.246	0.303	0.225	0	0	17.442	19.6685	12.291	0	0	104	1.73333
119	1.5	1.75		0.164	1.5	0.201	1.5	0.151	0	0	0	0	0.246	0.3015	0.2265	0	0	17.688	19.97	12.5175	0	0	105	1.75
120	1.5	1.76667		0.164	1.5	0.2	1.5	0.151	0	0	0	0	0.246	0.3	0.2265	0	0	17.934	20.27	12.744	0	0	106	1.76667
121	1.5	1.78333		0.164	1.5	0.2	1.5	0.151	0	0	0	0	0.246	0.3	0.2265	0	0	18.18	20.57	12.9705	0	0	107	1.78333
122	1.5	1.8		0.164	1.5	0.2	1.5	0.151	0	0	0	0	0.246	0.3	0.2265	0	0	18.426	20.87	13.197	0	0	108	1.8
123	1.5	1.81667		0.165	1.5	0.2	1.5	0.152	0	0	0	0	0.2475	0.3	0.228	0	0	18.6735	21.17	13.425	0	0	109	1.81667
124	1.5	1.83333		0.166	1.5	0.2	1.5	0.152	0	0	0	0	0.249	0.3	0.228	0	0	18.9225	21.47	13.653	0	0	110	1.83333
125	1.5	1.85		0.167	1.5	0.2	1.5	0.152	0	0	0	0	0.2505	0.3	0.228	0	0	19.173	21.77	13.881	0	0	111	1.85
126	1.5	1.86667		0.167	1.5	0.201	1.5	0.152	0	0	0	0	0.2505	0.3015	0.228	0	0	19.4235	22.0715	14.109	0	0	112	1.86667
127	1.5	1.88333		0.168	1.5	0.201	1.5	0.151	0	0	0	0	0.252	0.3015	0.2265	0	0	19.6755	22.373	14.3355	0	0	113	1.88333
128	1.5	1.9		0.168	1.5	0.201	1.5	0.151	0	0	0	0	0.252	0.3015	0.2265	0	0	19.9275	22.6745	14.562	0	0	114	1.9
129	1.5	1.91667		0.169	1.5	0.202	1.5	0.151	0	0	0	0	0.2535	0.303	0.2265	0	0	20.181	22.9775	14.7885	0	0	115	1.91667
130	1.5	1.93333		0.169	1.5	0.202	1.5	0.151	0	0	0	0	0.2535	0.303	0.2265	0	0	20.4345	23.2805	15.015	0	0	116	1.93333
131	1.5	1.95		0.169	1.5	0.202	1.5	0.151	0	0	0	0	0.2535	0.303	0.2265	0	0	20.688	23.5835	15.2415	0	0	117	1.95
132	1.5	1.96667		0.17	1.5	0.202	1.5	0.151	0	0	0	0	0.255	0.303	0.2265	0	0	20.943	23.8865	15.468	0	0	118	1.96667
133	1.5	1.98333		0.171	1.5	0.203	1.5	0.121	0	0	0	0	0.2565	0.3045	0.1815	0	0	21.1995	24.191	15.6495	0	0	119	1.98333
134	1.5	2		0.171	1.5	0.204	1.5	0.062	0	0	0	0	0.2565	0.306	0.093	0	0	21.456	24.497	15.7425	0	0	120	2
135	1.5	2.01667		0.171	1.5	0.205	1.5	0.067	0	0	0	0	0.2565	0.3075	0.1005	0	0	21.7125	24.8045	15.843	0	0	121	2.01667
136	1.5	2.03333		0.172	1.5	0.206	1.5	0.064	0	0	0	0	0.258	0.309	0.096	0	0	21.9705	25.1135	15.939	0	0	122	2.03333
137	1.5	2.05		0.173	1.5	0.206	1.5	0.068	0	0	0	0	0.2595	0.309	0.102	0	0	22.23	25.4225	16.041	0	0	123	2.05
138	1.5	2.06667		0.174	1.5	0.207	1.5	0.066	0	0	0	0	0.261	0.3105	0.099	0	0	22.491	25.733	16.14	0	0	124	2.06667
139	1.5	2.08333		0.173	1.5	0.208	1.5	0.202	0	0	0	0	0.2595	0.312	0.303	0	0	22.7505	26.045	16.443	0	0	125	2.08333
140	1.5	2.1		0.174	1.5	0.208	1.5	0.198	0	0	0	0	0.261	0.312	0.297	0	0	23.0115	26.357	16.74	0	0	126	2.1
141	1.5	2.11667		0.174	1.5	0.21	1.5	0.195	0	0	0	0	0.261	0.315	0.2925	0	0	23.2725	26.672	17.0325	0	0	127	2.11667
142	1.5	2.13333		0.174	3.14	0.241	1.5	0.194	0	0	0	0	0.261	0.75674	0.291	0	0	23.5335	27.4287	17.3235	0	0	128	2.13333
143	1.5	2.15		0.174	1.5	0.24	1.5	0.194	0	0	0	0	0.261	0.36	0.291	0	0	23.7945	27.7887	17.6145	0	0	129	2.15
144	1.5	2.16667		0.174	1.5	0.237	1.5	0.194	0	0	0	0	0.261	0.3555	0.291	0	0	24.0555	28.1442	17.9055	0	0	130	2.16667
145	1.5	2.18333		0.2	1.5	0.233	1.5	0.19	0	0	0	0	0.3	0.3495	0.285	0	0	24.3555	28.4937	18.1905	0	0	131	2.18333
146	1.5	2.2		0.2	1.5	0.23	1.5	0.182	0	0	0	0	0.3	0.345	0.273	0	0	24.6555	28.8387	18.4635	0	0	132	2.2
147	1.5	2.21667		0.197	1.5	0.228	1.5	0.012	0	0	0	0	0.2955	0.342	0.018	0	0	24.951	29.1807	18.4815	0	0	133	2.21667
148	1.5	2.23333		0.194	1.5	0.225	1.5	0.074	0	0	0	0	0.291	0.3375	0.111	0	0	25.242	29.5182	18.5925	0	0	134	2.23333
149	1.5	2.25		0.192	1.5	0.224	1.5	0.107	0	0	0	0	0.288	0.336	0.1605	0	0	25.53	29.8542	18.753	0	0	135	2.25
150	1.5	2.26667		0.19	1.5	0.224	1.5	0.121	0	0	0	0	0.285	0.336	0.1815	0	0	25.815	30.1902	18.9345	0	0	136	2.26667
151	1.5	2.28333		0.188	1.5	0.223	1.5	0.106	0	0	0	0	0.282	0.3345	0.159	0	0	26.097	30.5247	19.0935	0	0	137	2.28333
152	1.5	2.3		0.189	1.5	0.223	1.5	0.103	0	0	0	0	0.2835	0.3345	0.1545	0	0	26.3805	30.8592	19.248	0	0	138	2.3
153	1.5	2.31667		0.19	1.5	0.222	1.5	0.11	0	0	0	0	0.285	0.333	0.165	0	0	26.6655	31.1922	19.413	0	0	139	2.31667
154	1.5	2.33333		0.191	1.5	0.223	1.5	0.111	0	0	0	0	0.2865	0.3345	0.1665	0	0	26.952	31.5267	19.5795	0	0	140	2.33333
155	1.5	2.35		0.191	1.5	0.223	1.5	0.109	0	0	0	0	0.2865	0.3345	0.1635	0	0	27.2385	31.8612	19.743	0	0	141	2.35
156	1.5	2.36667		0.191	1.5	0.223	1.5	0.132	0	0	0	0	0.2865	0.3345	0.198	0	0	27.525	32.1957	19.941	0	0	142	2.36667
157	1.5	2.38333		0.191	1.5	0.223	1.5	0.133	0	0	0	0	0.2865	0.3345	0.1995	0	0	27.8115	32.5302	20.1405	0	0	143	2.38333
158	1.5	2.4		0.191	1.5	0.224	1.5	0.139	0	0	0	0	0.2865	0.336	0.2085	0	0	28.098	32.8662	20.349	0	0	144	2.4
159	1.5	2.41667		0.191	1.5	0.224	1.5	0.117	0	0	0	0	0.2865	0.336	0.1755	0	0	28.3845	33.2022	20.5245	0	0	145	2.41667
160	1.5	2.43333		0.191	1.5	0.224	1.5	0.108	0	0	0	0	0.2865	0.336	0.162	0	0	28.671	33.5382	20.6865	0	0	146	2.43333
161	1.5	2.45		0.191	1.5	0.224	1.5	0.121	0	0	0	0	0.2865	0.336	0.1815	0	0	28.9575	33.8742	20.868	0	0	147	2.45
162	1.5	2.46667		0.191	1.5	0.225	1.5	0.11	0	0	0	0	0.2865	0.3375	0.165	0	0	29.244	34.2117	21.033	0	0	148	2.46667
163	1.5	2.48333		0.191	1.5	0.225	1.5	0.109	0	0	0	0	0.2865	0.3375	0.1635	0	0	29.5305	34.5492	21.1965	0	0	149	2.48333
164	1.5	2.5		0.191	1.5	0.225	1.5	0.104	0	0	0	0	0.2865	0.3375	0.156	0	0	29.817	34.8867	21.3525	0	0	150	2.5
165	1.5	2.51667		0.191	1.5	0.225	1.5	0.103	0	0	0	0	0.2865	0.3375	0.1545	0	0	30.1035	35.2242	21.507	0	0	151	2.51667
166	1.5	2.53333		0.192	1.5	0.226	1.5	0.105	0	0	0	0	0.288	0.339	0.1575	0	0	30.3915	35.5632	21.6645	0	0	152	2.53333
167	1.5	2.55		0.192	1.5	0.226	1.5	0.107	0	0	0	0	0.288	0.339	0.1605	0	0	30.6795	35.9022	21.825	0	0	153	2.55
168	1.5	2.56667		0.192	1.5	0.226	1.5	0.104	0	0	0	0	0.288	0.339	0.156	0	0	30.9675	36.2412	21.981	0	0	154	2.56667
169	1.5	2.58333		0.192	1.5	0.227	1.5	0.046	0	0	0	0	0.288	0.3405	0.069	0	0	31.2555	36.5817	22.05	0	0	155	2.58333
170	1.5	2.6		0.192	1.5	0.227	1.5	0.106	0	0	0	0	0.288	0.3405	0.159	0	0	31.5435	36.9222	22.209	0	0	156	2.6
171	1.5	2.61667		0.192	1.5	0.227	1.5	0.115	0	0	0	0	0.288	0.3405	0.1725	0	0	31.8315	37.2627	22.3815	0	0	157	2.61667
172	1.5	2.63333		0.192	1.5	0.966	1.5	0.142	0	0	0	0	0.288	1.449	0.213	0	0	32.1195	38.7117	22.5945	0	0	158	2.63333
173	1.5	2.65		0.192	1.5	0.258	1.5	0.147	0	0	0	0	0.288	0.387	0.2205	0	0	32.4075	39.0987	22.815	0	0	159	2.65
174	1.5	2.66667		0.193	1.5	0.255	1.5	0.088	0	0	0	0	0.2895	0.3825	0.132	0	0	32.697	39.4812	22.947	0	0	160	2.66667
175	1.5	2.68333		0.226	1.5	0.25	1.5	0.093	0	0	0	0	0.339	0.375	0.1395	0	0	33.036	39.8562	23.0865	0	0	161	2.68333
176	1.5	2.7		0.222	1.5	0.247	1.5	0.091	0	0	0	0	0.333	0.3705	0.1365	0	0	33.369	40.2267	23.223	0	0	162	2.7
177	1.5	2.71667		0.218	1.5	0.244	1.5	0.088	0	0	0	0	0.327	0.366	0.132	0	0	33.696	40.5927	23.355	0	0	163	2.71667
178	1.5	2.73333		0.215	1.5	0.242	1.5	0.083	0	0	0	0	0.3225	0.363	0.1245	0	0	34.0185	40.9557	23.4795	0	0	164	2.73333
179	1.5	2.75		0.212	1.5	0.24	1.5	0.082	0	0	0	0	0.318	0.36	0.123	0	0	34.3365	41.3157	23.6025	0	0	165	2.75
180	1.5	2.76667		0.21	1.5	0.239	1.5	0.082	0	0	0	0	0.315	0.3585	0.123	0	0	34.6515	41.6742	23.7255	0	0	166	2.76667
181	1.5	2.78333		0.208	1.5	0.238	1.5	0.083	0	0	0	0	0.312	0.357	0.1245	0	0	34.9635	42.0312	23.85	0	0	167	2.78333
182	1.5	2.8		0.206	1.5	0.238	1.5	0.081	0	0	0	0	0.309	0.357	0.1215	0	0	35.2725	42.3882	23.9715	0	0	168	2.8
183	1.5	2.81667		0.205	1.5	0.237	1.5	0.081	0	0	0	0	0.3075	0.3555	0.1215	0	0	35.58	42.7437	24.093	0	0	169	2.81667
184	1.5	2.83333		0.204	1.5	0.237	1.5	0.079	0	0	0	0	0.306	0.3555	0.1185	0	0	35.886	43.0992	24.2115	0	0	170	2.83333
185	1.5	2.85		0.204	1.5	0.237	1.5	0.078	0	0	0	0	0.306	0.3555	0.117	0	0	36.192	43.4547	24.3285	0	0	171	2.85
186	1.5	2.86667		0.203	1.5	0.237	1.5	0.072	0	0	0	0	0.3045	0.3555	0.108	0	0	36.4965	43.8102	24.4365	0	0	172	2.86667
187	1.5	2.88333		0.203	1.5	0.236	1.5	0.072	0	0	0	0	0.3045	0.354	0.108	0	0	36.801	44.1642	24.5445	0	0	173	2.88333
188	1.5	2.9		0.203	1.5	0.236	1.5	0.071	0	0	0	0	0.3045	0.354	0.1065	0	0	37.1055	44.5182	24.651	0	0	174	2.9
189	1.5	2.91667		0.203	1.5	0.236	1.5	0.069	0	0	0	0	0.3045	0.354	0.1035	0	0	37.41	44.8722	24.7545	0	0	175	2.91667
190	1.5	2.93333		0.203	1.5	0.237	1.5	0.069	0	0	0	0	0.3045	0.3555	0.1035	0	0	37.7145	45.2277	24.858	0	0	176	2.93333
191	1.5	2.95		0.203	1.5	0.237	1.5	0.096	0	0	0	0	0.3045	0.3555	0.144	0	0	38.019	45.5832	25.002	0	0	177	2.95
192	1.5	2.96667		0.203	1.5	0.237	1.5	0.117	0	0	0	0	0.3045	0.3555	0.1755	0	0	38.3235	45.9387	25.1775	0	0	178	2.96667
193	1.5	2.98333		0.203	1.5	0.237	1.5	0.108	0	0	0	0	0.3045	0.3555	0.162	0	0	38.628	46.2942	25.3395	0	0	179	2.98333
194	1.5	3		0.203	1.5	0.237	1.5	0.089	0	0	0	0	0.3045	0.3555	0.1335	0	0	38.9325	46.6497	25.473	0	0	180	3
195	1.5	3.01667		0.203	1.5	0.238	1.5	0.081	0	0	0	0	0.3045	0.357	0.1215	0	0	39.237	47.0067	25.5945	0	0	181	3.01667
196	1.5	3.03333		0.203	1.5	0.238	1.5	0.087	0	0	0	0	0.3045	0.357	0.1305	0	0	39.5415	47.3637	25.725	0	0	182	3.03333
197	1.5	3.05		0.203	1.5	0.238	1.5	0.097	0	0	0	0	0.3045	0.357	0.1455	0	0	39.846	47.7207	25.8705	0	0	183	3.05
198	1.5	3.06667		0.203	1.5	0.238	1.5	0.09	0	0	0	0	0.3045	0.357	0.135	0	0	40.1505	48.0777	26.0055	0	0	184	3.06667
199	1.5	3.08333		0.203	1.5	0.238	1.5	0.197	0	0	0	0	0.3045	0.357	0.2955	0	0	40.455	48.4347	26.301	0	0	185	3.08333
200	1.5	3.1		0.203	1.5	0.238	1.5	0.192	0	0	0	0	0.3045	0.357	0.288	0	0	40.7595	48.7917	26.589	0	0	186	3.1
201	1.5	3.11667		0.203	1.5	0.238	1.5	0.189	0	0	0	0	0.3045	0.357	0.2835	0	0	41.064	49.1487	26.8725	0	0	187	3.11667
202	1.5	3.13333		0.203	3.32	0.271	1.5	0.188	0	0	0	0	0.3045	0.89972	0.282	0	0	41.3685	50.0484	27.1545	0	0	188	3.13333
203	1.5	3.15		0.203	1.5	0.272	1.5	0.188	0	0	0	0	0.3045	0.408	0.282	0	0	41.673	50.4564	27.4365	0	0	189	3.15
204	1.5	3.16667		0.203	1.5	0.268	1.5	0.188	0	0	0	0	0.3045	0.402	0.282	0	0	41.9775	50.8584	27.7185	0	0	190	3.16667
205	1.5	3.18333		0.237	1.5	0.265	1.5	0.188	0	0	0	0	0.3555	0.3975	0.282	0	0	42.333	51.2559	28.0005	0	0	191	3.18333
206	1.5	3.2		0.232	1.5	0.261	1.5	0.188	0	0	0	0	0.348	0.3915	0.282	0	0	42.681	51.6474	28.2825	0	0	192	3.2
207	1.5	3.21667		0.229	1.5	0.257	1.5	0.188	0	0	0	0	0.3435	0.3855	0.282	0	0	43.0245	52.0329	28.5645	0	0	193	3.21667
208	1.5	3.23333		0.225	1.5	0.255	1.5	0.188	0	0	0	0	0.3375	0.3825	0.282	0	0	43.362	52.4154	28.8465	0	0	194	3.23333
209	1.5	3.25		0.222	1.5	0.253	1.5	0.189	0	0	0	0	0.333	0.3795	0.2835	0	0	43.695	52.7949	29.13	0	0	195	3.25
210	1.5	3.26667		0.219	1.5	0.252	1.5	0.189	0	0	0	0	0.3285	0.378	0.2835	0	0	44.0235	53.1729	29.4135	0	0	196	3.26667
211	1.5	3.28333		0.217	1.5	0.251	1.5	0.189	0	0	0	0	0.3255	0.3765	0.2835	0	0	44.349	53.5494	29.697	0	0	197	3.28333
212	1.5	3.3		0.216	1.5	0.251	1.5	0.189	0	0	0	0	0.324	0.3765	0.2835	0	0	44.673	53.9259	29.9805	0	0	198	3.3
213	1.5	3.31667		0.214	1.5	0.25	1.5	0.189	0	0	0	0	0.321	0.375	0.2835	0	0	44.994	54.3009	30.264	0	0	199	3.31667
214	1.5	3.33333		0.214	1.5	0.25	1.5	0.19	0	0	0	0	0.321	0.375	0.285	0	0	45.315	54.6759	30.549	0	0	200	3.33333
215	1.5	3.35		0.213	1.5	0.25	1.5	0.19	0	0	0	0	0.3195	0.375	0.285	0	0	45.6345	55.0509	30.834	0	0	201	3.35
216	1.5	3.36667		0.213	1.5	0.249	1.5	0.19	0	0	0	0	0.3195	0.3735	0.285	0	0	45.954	55.4244	31.119	0	0	202	3.36667
217	1.5	3.38333		0.212	1.5	0.249	1.5	0.19	0	0	0	0	0.318	0.3735	0.285	0	0	46.272	55.7979	31.404	0	0	203	3.38333
218	1.5	3.4		0.212	1.5	0.249	1.5	0.19	0	0	0	0	0.318	0.3735	0.285	0	0	46.59	56.1714	31.689	0	0	204	3.4
219	1.5	3.41667		0.212	1.5	0.249	1.5	0.191	0	0	0	0	0.318	0.3735	0.2865	0	0	46.908	56.5449	31.9755	0	0	205	3.41667
220	1.5	3.43333		0.212	1.5	0.249	1.5	0.191	0	0	0	0	0.318	0.3735	0.2865	0	0	47.226	56.9184	32.262	0	0	206	3.43333
221	1.5	3.45		0.212	1.5	0.249	1.5	0.189	0	0	0	0	0.318	0.3735	0.2835	0	0	47.544	57.2919	32.5455	0	0	207	3.45
222	1.5	3.46667		0.211	1.5	0.249	1.5	0.186	0	0	0	0	0.3165	0.3735	0.279	0	0	47.8605	57.6654	32.8245	0	0	208	3.46667
223	1.5	3.48333		0.212	1.5	0.249	1.5	0.186	0	0	0	0	0.318	0.3735	0.279	0	0	48.1785	58.0389	33.1035	0	0	209	3.48333
224	1.5	3.5		0.211	1.5	0.25	1.5	0.187	0	0	0	0	0.3165	0.375	0.2805	0	0	48.495	58.4139	33.384	0	0	210	3.5
225	1.5	3.51667		0.211	1.5	0.25	1.5	0.187	0	0	0	0	0.3165	0.375	0.2805	0	0	48.8115	58.7889	33.6645	0	0	211	3.51667
226	1.5	3.53333		0.211	1.5	0.25	1.5	0.187	0	0	0	0	0.3165	0.375	0.2805	0	0	49.128	59.1639	33.945	0	0	212	3.53333
227	1.5	3.55		0.211	1.5	0.25	1.5	0.187	0	0	0	0	0.3165	0.375	0.2805	0	0	49.4445	59.5389	34.2255	0	0	213	3.55
228	1.5	3.56667		0.212	1.5	0.25	1.5	0.187	0	0	0	0	0.318	0.375	0.2805	0	0	49.7625	59.9139	34.506	0	0	214	3.56667
229	1.5	3.58333		0.211	1.5	0.251	1.5	0.18	0	0	0	0	0.3165	0.3765	0.27	0	0	50.079	60.2904	34.776	0	0	215	3.58333
230	1.5	3.6		0.211	1.5	0.251	1.5	0.189	0	0	0	0	0.3165	0.3765	0.2835	0	0	50.3955	60.6669	35.0595	0	0	216	3.6
231	1.5	3.61667		0.212	1.5	0.251	1.5	0.192	0	0	0	0	0.318	0.3765	0.288	0	0	50.7135	61.0434	35.3475	0	0	217	3.61667
232	1.5	3.63333		0.212	1.5	1	1.5	0.194	0	0	0	0	0.318	1.5	0.291	0	0	51.0315	62.5434	35.6385	0	0	218	3.63333
233	1.5	3.65		0.212	1.5	0.278	1.5	0.194	0	0	0	0	0.318	0.417	0.291	0	0	51.3495	62.9604	35.9295	0	0	219	3.65
234	1.5	3.66667		0.212	1.5	0.275	1.5	0.195	0	0	0	0	0.318	0.4125	0.2925	0	0	51.6675	63.3729	36.222	0	0	220	3.66667
235	1.5	3.68333		0.245	1.5	0.271	1.5	0.195	0	0	0	0	0.3675	0.4065	0.2925	0	0	52.035	63.7794	36.5145	0	0	221	3.68333
236	1.5	3.7		0.241	1.5	0.267	1.5	0.196	0	0	0	0	0.3615	0.4005	0.294	0	0	52.3965	64.1799	36.8085	0	0	222	3.7
237	1.5	3.71667		0.237	1.5	0.265	1.5	0.197	0	0	0	0	0.3555	0.3975	0.2955	0	0	52.752	64.5774	37.104	0	0	223	3.71667
238	1.5	3.73333		0.234	1.5	0.262	1.5	0.197	0	0	0	0	0.351	0.393	0.2955	0	0	53.103	64.9704	37.3995	0	0	224	3.73333
239	1.5	3.75		0.23	1.5	0.26	1.5	0.198	0	0	0	0	0.345	0.39	0.297	0	0	53.448	65.3604	37.6965	0	0	225	3.75
240	1.5	3.76667		0.228	1.5	0.259	1.5	0.198	0	0	0	0	0.342	0.3885	0.297	0	0	53.79	65.7489	37.9935	0	0	226	3.76667
241	1.5	3.78333		0.225	1.5	0.257	1.5	0.199	0	0	0	0	0.3375	0.3855	0.2985	0	0	54.1275	66.1344	38.292	0	0	227	3.78333
242	1.5	3.8		0.224	1.5	0.257	1.5	0.199	0	0	0	0	0.336	0.3855	0.2985	0	0	54.4635	66.5199	38.5905	0	0	228	3.8
243	1.5	3.81667		0.222	1.5	0.256	1.5	0.199	0	0	0	0	0.333	0.384	0.2985	0	0	54.7965	66.9039	38.889	0	0	229	3.81667
244	1.5	3.83333		0.221	1.5	0.256	1.5	0.199	0	0	0	0	0.3315	0.384	0.2985	0	0	55.128	67.2879	39.1875	0	0	230	3.83333
245	1.5	3.85		0.221	1.5	0.256	1.5	0.2	0	0	0	0	0.3315	0.384	0.3	0	0	55.4595	67.6719	39.4875	0	0	231	3.85
246	1.5	3.86667		0.22	1.5	0.256	1.5	0.2	0	0	0	0	0.33	0.384	0.3	0	0	55.7895	68.0559	39.7875	0	0	232	3.86667
247	1.5	3.88333		0.22	1.5	0.255	1.5	0.2	0	0	0	0	0.33	0.3825	0.3	0	0	56.1195	68.4384	40.0875	0	0	233	3.88333
248	1.5	3.9		0.22	1.5	0.255	1.5	0.201	0	0	0	0	0.33	0.3825	0.3015	0	0	56.4495	68.8209	40.389	0	0	234	3.9
249	1.5	3.91667		0.219	1.5	0.255	1.5	0.201	0	0	0	0	0.3285	0.3825	0.3015	0	0	56.778	69.2034	40.6905	0	0	235	3.91667
250	1.5	3.93333		0.219	1.5	0.255	1.5	0.201	0	0	0	0	0.3285	0.3825	0.3015	0	0	57.1065	69.5859	40.992	0	0	236	3.93333
251	1.5	3.95		0.219	1.5	0.255	1.5	0.202	0	0	0	0	0.3285	0.3825	0.303	0	0	57.435	69.9684	41.295	0	0	237	3.95
252	1.5	3.96667		0.219	1.5	0.255	1.5	0.202	0	0	0	0	0.3285	0.3825	0.303	0	0	57.7635	70.3509	41.598	0	0	238	3.96667
253	1.5	3.98333		0.219	1.5	0.255	1.5	0.202	0	0	0	0	0.3285	0.3825	0.303	0	0	58.092	70.7334	41.901	0	0	239	3.98333
254	1.5	4		0.219	1.5	0.255	1.5	0.202	0	0	0	0	0.3285	0.3825	0.303	0	0	58.4205	71.1159	42.204	0	0	240	4
255	1.5	4.01667		0.219	1.5	0.256	1.5	0.203	0	0	0	0	0.3285	0.384	0.3045	0	0	58.749	71.4999	42.5085	0	0	241	4.01667
256	1.5	4.03333		0.219	1.5	0.256	1.5	0.203	0	0	0	0	0.3285	0.384	0.3045	0	0	59.0775	71.8839	42.813	0	0	242	4.03333
257	1.5	4.05		0.218	1.5	0.256	1.5	0.203	0	0	0	0	0.327	0.384	0.3045	0	0	59.4045	72.2679	43.1175	0	0	243	4.05
258	1.5	4.06667		0.218	1.5	0.256	1.5	0.203	0	0	0	0	0.327	0.384	0.3045	0	0	59.7315	72.6519	43.422	0	0	244	4.06667
259	1.5	4.08333		0.218	1.5	0.256	1.5	0.233	0	0	0	0	0.327	0.384	0.3495	0	0	60.0585	73.0359	43.7715	0	0	245	4.08333
260	1.5	4.1		0.218	1.5	0.256	1.5	0.227	0	0	0	0	0.327	0.384	0.3405	0	0	60.3855	73.4199	44.112	0	0	246	4.1
261	1.5	4.11667		0.218	1.5	0.256	1.5	0.223	0	0	0	0	0.327	0.384	0.3345	0	0	60.7125	73.8039	44.4465	0	0	247	4.11667
262	1.5	4.13333		0.218	3.4	0.284	1.5	0.221	0	0	0	0	0.327	0.9656	0.3315	0	0	61.0395	74.7695	44.778	0	0	248	4.13333
263	1.5	4.15		0.218	1.5	0.283	1.5	0.22	0	0	0	0	0.327	0.4245	0.33	0	0	61.3665	75.194	45.108	0	0	249	4.15
264	1.5	4.16667		0.218	1.5	0.281	1.5	0.22	0	0	0	0	0.327	0.4215	0.33	0	0	61.6935	75.6155	45.438	0	0	250	4.16667
265	1.5	4.18333		0.25	1.5	0.277	1.5	0.219	0	0	0	0	0.375	0.4155	0.3285	0	0	62.0685	76.031	45.7665	0	0	251	4.18333
266	1.5	4.2		0.247	1.5	0.273	1.5	0.219	0	0	0	0	0.3705	0.4095	0.3285	0	0	62.439	76.4405	46.095	0	0	252	4.2
267	1.5	4.21667		0.243	1.5	0.27	1.5	0.218	0	0	0	0	0.3645	0.405	0.327	0	0	62.8035	76.8455	46.422	0	0	253	4.21667
268	1.5	4.23333		0.239	1.5	0.268	1.5	0.218	0	0	0	0	0.3585	0.402	0.327	0	0	63.162	77.2475	46.749	0	0	254	4.23333
269	1.5	4.25		0.236	1.5	0.266	1.5	0.218	0	0	0	0	0.354	0.399	0.327	0	0	63.516	77.6465	47.076	0	0	255	4.25
270	1.5	4.26667		0.234	1.5	0.265	1.5	0.218	0	0	0	0	0.351	0.3975	0.327	0	0	63.867	78.044	47.403	0	0	256	4.26667
271	1.5	4.28333		0.232	1.5	0.263	1.5	0.218	0	0	0	0	0.348	0.3945	0.327	0	0	64.215	78.4385	47.73	0	0	257	4.28333
272	1.5	4.3		0.231	1.5	0.262	1.5	0.217	0	0	0	0	0.3465	0.393	0.3255	0	0	64.5615	78.8315	48.0555	0	0	258	4.3
273	1.5	4.31667		0.229	1.5	0.262	1.5	0.209	0	0	0	0	0.3435	0.393	0.3135	0	0	64.905	79.2245	48.369	0	0	259	4.31667
274	1.5	4.33333		0.228	1.5	0.261	1.5	0.207	0	0	0	0	0.342	0.3915	0.3105	0	0	65.247	79.616	48.6795	0	0	260	4.33333
275	1.5	4.35		0.227	1.5	0.261	1.5	0.171	0	0	0	0	0.3405	0.3915	0.2565	0	0	65.5875	80.0075	48.936	0	0	261	4.35
276	1.5	4.36667		0.226	1.5	0.261	1.5	0.149	0	0	0	0	0.339	0.3915	0.2235	0	0	65.9265	80.399	49.1595	0	0	262	4.36667
277	1.5	4.38333		0.226	1.5	0.26	1.5	0.04	0	0	0	0	0.339	0.39	0.06	0	0	66.2655	80.789	49.2195	0	0	263	4.38333
278	1.5	4.4		0.225	1.5	0.26	1.5	0.035	0	0	0	0	0.3375	0.39	0.0525	0	0	66.603	81.179	49.272	0	0	264	4.4
279	1.5	4.41667		0.225	1.5	0.26	1.5	0.071	0	0	0	0	0.3375	0.39	0.1065	0	0	66.9405	81.569	49.3785	0	0	265	4.41667
280	1.5	4.43333		0.225	1.5	0.26	1.5	0.049	0	0	0	0	0.3375	0.39	0.0735	0	0	67.278	81.959	49.452	0	0	266	4.43333
281	1.5	4.45		0.225	1.5	0.26	1.5	0.073	0	0	0	0	0.3375	0.39	0.1095	0	0	67.6155	82.349	49.5615	0	0	267	4.45
282	1.5	4.46667		0.225	1.5	0.26	1.5	0.061	0	0	0	0	0.3375	0.39	0.0915	0	0	67.953	82.739	49.653	0	0	268	4.46667
283	1.5	4.48333		0.225	1.5	0.26	1.5	0.062	0	0	0	0	0.3375	0.39	0.093	0	0	68.2905	83.129	49.746	0	0	269	4.48333
284	1.5	4.5		0.224	1.5	0.26	1.5	0.066	0	0	0	0	0.336	0.39	0.099	0	0	68.6265	83.519	49.845	0	0	270	4.5
285	1.5	4.51667		0.224	1.5	0.26	1.5	0.055	0	0	0	0	0.336	0.39	0.0825	0	0	68.9625	83.909	49.9275	0	0	271	4.51667
286	1.5	4.53333		0.224	1.5	0.26	1.5	0.079	0	0	0	0	0.336	0.39	0.1185	0	0	69.2985	84.299	50.046	0	0	272	4.53333
287	1.5	4.55		0.224	1.5	0.26	1.5	0.054	0	0	0	0	0.336	0.39	0.081	0	0	69.6345	84.689	50.127	0	0	273	4.55
288	1.5	4.56667		0.224	1.5	0.26	1.5	0.068	0	0	0	0	0.336	0.39	0.102	0	0	69.9705	85.079	50.229	0	0	274	4.56667
289	1.5	4.58333		0.224	1.5	0.26	1.5	0.131	0	0	0	0	0.336	0.39	0.1965	0	0	70.3065	85.469	50.4255	0	0	275	4.58333
290	1.5	4.6		0.224	1.5	0.26	1.5	0.157	0	0	0	0	0.336	0.39	0.2355	0	0	70.6425	85.859	50.661	0	0	276	4.6
291	1.5	4.61667		0.224	1.5	0.26	1.5	0.162	0	0	0	0	0.336	0.39	0.243	0	0	70.9785	86.249	50.904	0	0	277	4.61667
292	1.5	4.63333		0.224	1.5	1	1.5	0.165	0	0	0	0	0.336	1.5	0.2475	0	0	71.3145	87.749	51.1515	0	0	278	4.63333
293	1.5	4.65		0.224	1.5	0.29	1.5	0.166	0	0	0	0	0.336	0.435	0.249	0	0	71.6505	88.184	51.4005	0	0	279	4.65
294	1.5	4.66667		0.223	1.5	0.286	1.5	0.167	0	0	0	0	0.3345	0.429	0.2505	0	0	71.985	88.613	51.651	0	0	280	4.66667
295	1.5	4.68333		0.255	1.5	0.282	1.5	0.168	0	0	0	0	0.3825	0.423	0.252	0	0	72.3675	89.036	51.903	0	0	281	4.68333
296	1.5	4.7		0.252	1.5	0.279	1.5	0.17	0	0	0	0	0.378	0.4185	0.255	0	0	72.7455	89.4545	52.158	0	0	282	4.7
297	1.5	4.71667		0.248	1.5	0.276	1.5	0.171	0	0	0	0	0.372	0.414	0.2565	0	0	73.1175	89.8685	52.4145	0	0	283	4.71667
298	1.5	4.73333		0.244	1.5	0.274	1.5	0.171	0	0	0	0	0.366	0.411	0.2565	0	0	73.4835	90.2795	52.671	0	0	284	4.73333
299	1.5	4.75		0.241	1.5	0.272	1.5	0.172	0	0	0	0	0.3615	0.408	0.258	0	0	73.845	90.6875	52.929	0	0	285	4.75
300	1.5	4.76667		0.238	1.5	0.271	1.5	0.172	0	0	0	0	0.357	0.4065	0.258	0	0	74.202	91.094	53.187	0	0	286	4.76667
301	1.5	4.78333		0.236	1.5	0.269	1.5	0.173	0	0	0	0	0.354	0.4035	0.2595	0	0	74.556	91.4975	53.4465	0	0	287	4.78333
302	1.5	4.8		0.235	1.5	0.269	1.5	0.173	0	0	0	0	0.3525	0.4035	0.2595	0	0	74.9085	91.901	53.706	0	0	288	4.8
303	1.5	4.81667		0.233	1.5	0.268	1.5	0.174	0	0	0	0	0.3495	0.402	0.261	0	0	75.258	92.303	53.967	0	0	289	4.81667
304	1.5	4.83333		0.232	1.5	0.267	1.5	0.174	0	0	0	0	0.348	0.4005	0.261	0	0	75.606	92.7035	54.228	0	0	290	4.83333
305	1.5	4.85		0.232	1.5	0.267	1.5	0.174	0	0	0	0	0.348	0.4005	0.261	0	0	75.954	93.104	54.489	0	0	291	4.85
306	1.5	4.86667		0.231	1.5	0.267	1.5	0.174	0	0	0	0	0.3465	0.4005	0.261	0	0	76.3005	93.5045	54.75	0	0	292	4.86667
307	1.5	4.88333		0.23	1.5	0.267	1.5	0.174	0	0	0	0	0.345	0.4005	0.261	0	0	76.6455	93.905	55.011	0	0	293	4.88333
308	1.5	4.9		0.23	1.5	0.267	1.5	0.174	0	0	0	0	0.345	0.4005	0.261	0	0	76.9905	94.3055	55.272	0	0	294	4.9
309	1.5	4.91667		0.23	1.5	0.267	1.5	0.175	0	0	0	0	0.345	0.4005	0.2625	0	0	77.3355	94.706	55.5345	0	0	295	4.91667
310	1.5	4.93333		0.229	1.5	0.266	1.5	0.175	0	0	0	0	0.3435	0.399	0.2625	0	0	77.679	95.105	55.797	0	0	296	4.93333
311	1.5	4.95		0.229	1.5	0.266	1.5	0.175	0	0	0	0	0.3435	0.399	0.2625	0	0	78.0225	95.504	56.0595	0	0	297	4.95
312	1.5	4.96667		0.229	1.5	0.266	1.5	0.175	0	0	0	0	0.3435	0.399	0.2625	0	0	78.366	95.903	56.322	0	0	298	4.96667
313	1.5	4.98333		0.229	1.5	0.266	1.5	0.175	0	0	0	0	0.3435	0.399	0.2625	0	0	78.7095	96.302	56.5845	0	0	299	4.98333
314	1.5	5		0.228	1.5	0.266	1.5	0.175	0	0	0	0	0.342	0.399	0.2625	0	0	79.0515	96.701	56.847	0	0	300	5
315	1.5	5.01667		0.228	1.5	0.266	1.5	0.176	0	0	0	0	0.342	0.399	0.264	0	0	79.3935	97.1	57.111	0	0	301	5.01667
316	1.5	5.03333		0.228	1.5	0.266	1.5	0.176	0	0	0	0	0.342	0.399	0.264	0	0	79.7355	97.499	57.375	0	0	302	5.03333
317	1.5	5.05		0.228	1.5	0.266	1.5	0.176	0	0	0	0	0.342	0.399	0.264	0	0	80.0775	97.898	57.639	0	0	303	5.05
318	1.5	5.06667		0.228	1.5	0.266	1.5	0.176	0	0	0	0	0.342	0.399	0.264	0	0	80.4195	98.297	57.903	0	0	304	5.06667
319	1.5	5.08333		0.228	1.5	0.266	1.5	0.138	0	0	0	0	0.342	0.399	0.207	0	0	80.7615	98.696	58.11	0	0	305	5.08333
320	1.5	5.1		0.228	1.5	0.266	1.5	0.17	0	0	0	0	0.342	0.399	0.255	0	0	81.1035	99.095	58.365	0	0	306	5.1
321	1.5	5.11667		0.228	1.5	0.267	1.5	0.184	0	0	0	0	0.342	0.4005	0.276	0	0	81.4455	99.4955	58.641	0	0	307	5.11667
322	1.5	5.13333		0.229	3.48	0.294	1.5	0.188	0	0	0	0	0.3435	1.02312	0.282	0	0	81.789	100.519	58.923	0	0	308	5.13333
323	1.5	5.15		0.229	1.5	0.29	1.5	0.19	0	0	0	0	0.3435	0.435	0.285	0	0	82.1325	100.954	59.208	0	0	309	5.15
324	1.5	5.16667		0.229	1.5	0.287	1.5	0.19	0	0	0	0	0.3435	0.4305	0.285	0	0	82.476	101.384	59.493	0	0	310	5.16667
325	1.5	5.18333		0.259	1.5	0.284	1.5	0.191	0	0	0	0	0.3885	0.426	0.2865	0	0	82.8645	101.81	59.7795	0	0	311	5.18333
326	1.5	5.2		0.256	1.5	0.28	1.5	0.192	0	0	0	0	0.384	0.42	0.288	0	0	83.2485	102.23	60.0675	0	0	312	5.2
327	1.5	5.21667		0.252	1.5	0.277	1.5	0.192	0	0	0	0	0.378	0.4155	0.288	0	0	83.6265	102.646	60.3555	0	0	313	5.21667
328	1.5	5.23333		0.249	1.5	0.274	1.5	0.193	0	0	0	0	0.3735	0.411	0.2895	0	0	84	103.057	60.645	0	0	314	5.23333
329	1.5	5.25		0.246	1.5	0.273	1.5	0.193	0	0	0	0	0.369	0.4095	0.2895	0	0	84.369	103.466	60.9345	0	0	315	5.25
330	1.5	5.26667		0.243	1.5	0.271	1.5	0.194	0	0	0	0	0.3645	0.4065	0.291	0	0	84.7335	103.873	61.2255	0	0	316	5.26667
331	1.5	5.28333		0.241	1.5	0.27	1.5	0.194	0	0	0	0	0.3615	0.405	0.291	0	0	85.095	104.278	61.5165	0	0	317	5.28333
332	1.5	5.3		0.24	1.5	0.269	1.5	0.194	0	0	0	0	0.36	0.4035	0.291	0	0	85.455	104.681	61.8075	0	0	318	5.3
333	1.5	5.31667		0.238	1.5	0.268	1.5	0.195	0	0	0	0	0.357	0.402	0.2925	0	0	85.812	105.083	62.1	0	0	319	5.31667
334	1.5	5.33333		0.237	1.5	0.268	1.5	0.195	0	0	0	0	0.3555	0.402	0.2925	0	0	86.1675	105.485	62.3925	0	0	320	5.33333
335	1.5	5.35		0.236	1.5	0.267	1.5	0.195	0	0	0	0	0.354	0.4005	0.2925	0	0	86.5215	105.886	62.685	0	0	321	5.35
336	1.5	5.36667		0.236	1.5	0.267	1.5	0.195	0	0	0	0	0.354	0.4005	0.2925	0	0	86.8755	106.286	62.9775	0	0	322	5.36667
337	1.5	5.38333		0.235	1.5	0.267	1.5	0.196	0	0	0	0	0.3525	0.4005	0.294	0	0	87.228	106.687	63.2715	0	0	323	5.38333
338	1.5	5.4		0.235	1.5	0.267	1.5	0.196	0	0	0	0	0.3525	0.4005	0.294	0	0	87.5805	107.087	63.5655	0	0	324	5.4
339	1.5	5.41667		0.234	1.5	0.266	1.5	0.196	0	0	0	0	0.351	0.399	0.294	0	0	87.9315	107.486	63.8595	0	0	325	5.41667
340	1.5	5.43333		0.234	1.5	0.266	1.5	0.197	0	0	0	0	0.351	0.399	0.2955	0	0	88.2825	107.885	64.155	0	0	326	5.43333
341	1.5	5.45		0.234	1.5	0.266	1.5	0.197	0	0	0	0	0.351	0.399	0.2955	0	0	88.6335	108.284	64.4505	0	0	327	5.45
342	1.5	5.46667		0.234	1.5	0.266	1.5	0.197	0	0	0	0	0.351	0.399	0.2955	0	0	88.9845	108.683	64.746	0	0	328	5.46667
343	1.5	5.48333		0.233	1.5	0.266	1.5	0.197	0	0	0	0	0.3495	0.399	0.2955	0	0	89.334	109.082	65.0415	0	0	329	5.48333
344	1.5	5.5		0.232	1.5	0.266	1.5	0.197	0	0	0	0	0.348	0.399	0.2955	0	0	89.682	109.481	65.337	0	0	330	5.5
345	1.5	5.51667		0.232	1.5	0.266	1.5	0.197	0	0	0	0	0.348	0.399	0.2955	0	0	90.03	109.88	65.6325	0	0	331	5.51667
346	1.5	5.53333		0.232	1.5	0.266	1.5	0.198	0	0	0	0	0.348	0.399	0.297	0	0	90.378	110.279	65.9295	0	0	332	5.53333
347	1.5	5.55		0.232	1.5	0.265	1.5	0.198	0	0	0	0	0.348	0.3975	0.297	0	0	90.726	110.677	66.2265	0	0	333	5.55
348	1.5	5.56667		0.232	1.5	0.265	1.5	0.198	0	0	0	0	0.348	0.3975	0.297	0	0	91.074	111.074	66.5235	0	0	334	5.56667
349	1.5	5.58333		0.232	1.5	0.266	1.5	0.2	0	0	0	0	0.348	0.399	0.3	0	0	91.422	111.473	66.8235	0	0	335	5.58333
350	1.5	5.6		0.232	1.5	0.266	1.5	0.218	0	0	0	0	0.348	0.399	0.327	0	0	91.77	111.872	67.1505	0	0	336	5.6
351	1.5	5.61667		0.232	1.5	0.266	1.5	0.221	0	0	0	0	0.348	0.399	0.3315	0	0	92.118	112.271	67.482	0	0	337	5.61667
352	1.5	5.63333		0.232	1.5	1	1.5	0.222	0	0	0	0	0.348	1.5	0.333	0	0	92.466	113.771	67.815	0	0	338	5.63333
353	1.5	5.65		0.232	1.5	0.296	1.5	0.222	0	0	0	0	0.348	0.444	0.333	0	0	92.814	114.215	68.148	0	0	339	5.65
354	1.5	5.66667		0.232	1.5	0.293	1.5	0.222	0	0	0	0	0.348	0.4395	0.333	0	0	93.162	114.655	68.481	0	0	340	5.66667
355	1.5	5.68333		0.262	1.5	0.29	1.5	0.223	0	0	0	0	0.393	0.435	0.3345	0	0	93.555	115.09	68.8155	0	0	341	5.68333
356	1.5	5.7		0.259	1.5	0.287	1.5	0.223	0	0	0	0	0.3885	0.4305	0.3345	0	0	93.9435	115.52	69.15	0	0	342	5.7
357	1.5	5.71667		0.255	1.5	0.284	1.5	0.223	0	0	0	0	0.3825	0.426	0.3345	0	0	94.326	115.946	69.4845	0	0	343	5.71667
358	1.5	5.73333		0.252	1.5	0.281	1.5	0.223	0	0	0	0	0.378	0.4215	0.3345	0	0	94.704	116.368	69.819	0	0	344	5.73333
359	1.5	5.75		0.249	1.5	0.279	1.5	0.224	0	0	0	0	0.3735	0.4185	0.336	0	0	95.0775	116.786	70.155	0	0	345	5.75
360	1.5	5.76667		0.246	1.5	0.277	1.5	0.224	0	0	0	0	0.369	0.4155	0.336	0	0	95.4465	117.202	70.491	0	0	346	5.76667
361	1.5	5.78333		0.244	1.5	0.276	1.5	0.224	0	0	0	0	0.366	0.414	0.336	0	0	95.8125	117.616	70.827	0	0	347	5.78333
362	1.5	5.8		0.243	1.5	0.276	1.5	0.224	0	0	0	0	0.3645	0.414	0.336	0	0	96.177	118.03	71.163	0	0	348	5.8
363	1.5	5.81667		0.241	1.5	0.275	1.5	0.224	0	0	0	0	0.3615	0.4125	0.336	0	0	96.5385	118.442	71.499	0	0	349	5.81667
364	1.5	5.83333		0.241	1.5	0.274	1.5	0.224	0	0	0	0	0.3615	0.411	0.336	0	0	96.9	118.853	71.835	0	0	350	5.83333
365	1.5	5.85		0.239	1.5	0.274	1.5	0.225	0	0	0	0	0.3585	0.411	0.3375	0	0	97.2585	119.264	72.1725	0	0	351	5.85
366	1.5	5.86667		0.239	1.5	0.274	1.5	0.225	0	0	0	0	0.3585	0.411	0.3375	0	0	97.617	119.675	72.51	0	0	352	5.86667
367	1.5	5.88333		0.238	1.5	0.274	1.5	0.225	0	0	0	0	0.357	0.411	0.3375	0	0	97.974	120.086	72.8475	0	0	353	5.88333
368	1.5	5.9		0.238	1.5	0.273	1.5	0.225	0	0	0	0	0.357	0.4095	0.3375	0	0	98.331	120.496	73.185	0	0	354	5.9
369	1.5	5.91667		0.237	1.5	0.273	1.5	0.225	0	0	0	0	0.3555	0.4095	0.3375	0	0	98.6865	120.905	73.5225	0	0	355	5.91667
370	1.5	5.93333		0.237	1.5	0.273	1.5	0.226	0	0	0	0	0.3555	0.4095	0.339	0	0	99.042	121.315	73.8615	0	0	356	5.93333
371	1.5	5.95		0.237	1.5	0.273	1.5	0.226	0	0	0	0	0.3555	0.4095	0.339	0	0	99.3975	121.724	74.2005	0	0	357	5.95
372	1.5	5.96667		0.236	1.5	0.273	1.5	0.226	0	0	0	0	0.354	0.4095	0.339	0	0	99.7515	122.134	74.5395	0	0	358	5.96667
373	1.5	5.98333		0.236	1.5	0.273	1.5	0.226	0	0	0	0	0.354	0.4095	0.339	0	0	100.105	122.543	74.8785	0	0	359	5.98333
374	1.5	6		0.235	1.5	0.273	1.5	0.226	0	0	0	0	0.3525	0.4095	0.339	0	0	100.458	122.953	75.2175	0	0	360	6
375	1.5	6.01667		0.235	1.5	0.273	1.5	0.226	0	0	0	0	0.3525	0.4095	0.339	0	0	100.81	123.362	75.5565	0	0	361	6.01667
376	1.5	6.03333		0.235	1.5	0.273	1.5	0.226	0	0	0	0	0.3525	0.4095	0.339	0	0	101.163	123.772	75.8955	0	0	362	6.03333
377	1.5	6.05		0.235	1.5	0.273	1.5	0.226	0	0	0	0	0.3525	0.4095	0.339	0	0	101.516	124.181	76.2345	0	0	363	6.05
378	1.5	6.06667		0.235	1.5	0.273	1.5	0.226	0	0	0	0	0.3525	0.4095	0.339	0	0	101.868	124.591	76.5735	0	0	364	6.06667
379	1.5	6.08333		0.235	1.5	0.273	1.5	0.246	0	0	0	0	0.3525	0.4095	0.369	0	0	102.221	125	76.9425	0	0	365	6.08333
380	1.5	6.1		0.235	1.5	0.273	1.5	0.241	0	0	0	0	0.3525	0.4095	0.3615	0	0	102.573	125.41	77.304	0	0	366	6.1
381	1.5	6.11667		0.235	1.5	0.273	1.5	0.236	0	0	0	0	0.3525	0.4095	0.354	0	0	102.925	125.819	77.658	0	0	367	6.11667
382	1.5	6.13333		0.234	3.53	0.305	1.5	0.234	0	0	0	0	0.351	1.07665	0.351	0	0	103.276	126.896	78.009	0	0	368	6.13333
383	1.5	6.15		0.235	1.5	0.297	1.5	0.233	0	0	0	0	0.3525	0.4455	0.3495	0	0	103.629	127.341	78.3585	0	0	369	6.15
384	1.5	6.16667		0.235	1.5	0.294	1.5	0.232	0	0	0	0	0.3525	0.441	0.348	0	0	103.981	127.782	78.7065	0	0	370	6.16667
385	1.5	6.18333		0.263	1.5	0.29	1.5	0.231	0	0	0	0	0.3945	0.435	0.3465	0	0	104.376	128.217	79.053	0	0	371	6.18333
386	1.5	6.2		0.26	1.5	0.287	1.5	0.231	0	0	0	0	0.39	0.4305	0.3465	0	0	104.766	128.648	79.3995	0	0	372	6.2
387	1.5	6.21667		0.258	1.5	0.283	1.5	0.231	0	0	0	0	0.387	0.4245	0.3465	0	0	105.153	129.072	79.746	0	0	373	6.21667
388	1.5	6.23333		0.254	1.5	0.281	1.5	0.231	0	0	0	0	0.381	0.4215	0.3465	0	0	105.534	129.494	80.0925	0	0	374	6.23333
389	1.5	6.25		0.251	1.5	0.279	1.5	0.231	0	0	0	0	0.3765	0.4185	0.3465	0	0	105.91	129.912	80.439	0	0	375	6.25
390	1.5	6.26667		0.248	1.5	0.278	1.5	0.23	0	0	0	0	0.372	0.417	0.345	0	0	106.282	130.329	80.784	0	0	376	6.26667
391	1.5	6.28333		0.246	1.5	0.277	1.5	0.23	0	0	0	0	0.369	0.4155	0.345	0	0	106.651	130.745	81.129	0	0	377	6.28333
392	1.5	6.3		0.245	1.5	0.276	1.5	0.23	0	0	0	0	0.3675	0.414	0.345	0	0	107.019	131.159	81.474	0	0	378	6.3
393	1.5	6.31667		0.244	1.5	0.275	1.5	0.23	0	0	0	0	0.366	0.4125	0.345	0	0	107.385	131.571	81.819	0	0	379	6.31667
394	1.5	6.33333		0.242	1.5	0.274	1.5	0.23	0	0	0	0	0.363	0.411	0.345	0	0	107.748	131.982	82.164	0	0	380	6.33333
395	1.5	6.35		0.242	1.5	0.274	1.5	0.23	0	0	0	0	0.363	0.411	0.345	0	0	108.111	132.393	82.509	0	0	381	6.35
396	1.5	6.36667		0.241	1.5	0.273	1.5	0.231	0	0	0	0	0.3615	0.4095	0.3465	0	0	108.472	132.803	82.8555	0	0	382	6.36667
397	1.5	6.38333		0.241	1.5	0.273	1.5	0.231	0	0	0	0	0.3615	0.4095	0.3465	0	0	108.834	133.212	83.202	0	0	383	6.38333
398	1.5	6.4		0.24	1.5	0.273	1.5	0.231	0	0	0	0	0.36	0.4095	0.3465	0	0	109.194	133.622	83.5485	0	0	384	6.4
399	1.5	6.41667		0.24	1.5	0.272	1.5	0.231	0	0	0	0	0.36	0.408	0.3465	0	0	109.554	134.03	83.895	0	0	385	6.41667
400	1.5	6.43333		0.24	1.5	0.272	1.5	0.231	0	0	0	0	0.36	0.408	0.3465	0	0	109.914	134.438	84.2415	0	0	386	6.43333
401	1.5	6.45		0.24	1.5	0.272	1.5	0.231	0	0	0	0	0.36	0.408	0.3465	0	0	110.274	134.846	84.588	0	0	387	6.45
402	1.5	6.46667		0.239	1.5	0.271	1.5	0.231	0	0	0	0	0.3585	0.4065	0.3465	0	0	110.632	135.252	84.9345	0	0	388	6.46667
403	1.5	6.48333		0.239	1.5	0.271	1.5	0.231	0	0	0	0	0.3585	0.4065	0.3465	0	0	110.991	135.659	85.281	0	0	389	6.48333
404	1.5	6.5		0.239	1.5	0.27	1.5	0.231	0	0	0	0	0.3585	0.405	0.3465	0	0	111.35	136.064	85.6275	0	0	390	6.5
405	1.5	6.51667		0.238	1.5	0.27	1.5	0.231	0	0	0	0	0.357	0.405	0.3465	0	0	111.707	136.469	85.974	0	0	391	6.51667
406	1.5	6.53333		0.239	1.5	0.27	1.5	0.231	0	0	0	0	0.3585	0.405	0.3465	0	0	112.065	136.874	86.3205	0	0	392	6.53333
407	1.5	6.55		0.238	1.5	0.27	1.5	0.231	0	0	0	0	0.357	0.405	0.3465	0	0	112.422	137.279	86.667	0	0	393	6.55
408	1.5	6.56667		0.238	1.5	0.27	1.5	0.231	0	0	0	0	0.357	0.405	0.3465	0	0	112.779	137.684	87.0135	0	0	394	6.56667
409	1.5	6.58333		0.238	1.5	0.269	1.5	0.249	0	0	0	0	0.357	0.4035	0.3735	0	0	113.136	138.087	87.387	0	0	395	6.58333
410	1.5	6.6		0.238	1.5	0.269	1.5	0.243	0	0	0	0	0.357	0.4035	0.3645	0	0	113.493	138.491	87.7515	0	0	396	6.6
411	1.5	6.61667		0.238	1.5	0.269	1.5	0.239	0	0	0	0	0.357	0.4035	0.3585	0	0	113.85	138.894	88.11	0	0	397	6.61667
412	1.5	6.63333		0.238	1.5	1	1.5	0.237	0	0	0	0	0.357	1.5	0.3555	0	0	114.207	140.394	88.4655	0	0	398	6.63333
413	1.5	6.65		0.239	1.5	0.297	1.5	0.236	0	0	0	0	0.3585	0.4455	0.354	0	0	114.566	140.84	88.8195	0	0	399	6.65
414	1.5	6.66667		0.239	1.5	0.295	1.5	0.235	0	0	0	0	0.3585	0.4425	0.3525	0	0	114.924	141.282	89.172	0	0	400	6.66667
415	1.5	6.68333		0.267	1.5	0.292	1.5	0.235	0	0	0	0	0.4005	0.438	0.3525	0	0	115.325	141.72	89.5245	0	0	401	6.68333
416	1.5	6.7		0.264	1.5	0.289	1.5	0.234	0	0	0	0	0.396	0.4335	0.351	0	0	115.721	142.154	89.8755	0	0	402	6.7
417	1.5	6.71667		0.26	1.5	0.286	1.5	0.234	0	0	0	0	0.39	0.429	0.351	0	0	116.111	142.583	90.2265	0	0	403	6.71667
418	1.5	6.73333		0.257	1.5	0.283	1.5	0.234	0	0	0	0	0.3855	0.4245	0.351	0	0	116.496	143.007	90.5775	0	0	404	6.73333
419	1.5	6.75		0.254	1.5	0.282	1.5	0.234	0	0	0	0	0.381	0.423	0.351	0	0	116.877	143.43	90.9285	0	0	405	6.75
420	1.5	6.76667		0.252	1.5	0.28	1.5	0.234	0	0	0	0	0.378	0.42	0.351	0	0	117.255	143.85	91.2795	0	0	406	6.76667
421	1.5	6.78333		0.251	1.5	0.279	1.5	0.234	0	0	0	0	0.3765	0.4185	0.351	0	0	117.632	144.269	91.6305	0	0	407	6.78333
422	1.5	6.8		0.249	1.5	0.278	1.5	0.233	0	0	0	0	0.3735	0.417	0.3495	0	0	118.005	144.686	91.98	0	0	408	6.8
423	1.5	6.81667		0.248	1.5	0.277	1.5	0.233	0	0	0	0	0.372	0.4155	0.3495	0	0	118.377	145.101	92.3295	0	0	409	6.81667
424	1.5	6.83333		0.246	1.5	0.277	1.5	0.233	0	0	0	0	0.369	0.4155	0.3495	0	0	118.746	145.517	92.679	0	0	410	6.83333
425	1.5	6.85		0.246	1.5	0.277	1.5	0.233	0	0	0	0	0.369	0.4155	0.3495	0	0	119.115	145.932	93.0285	0	0	411	6.85
426	1.5	6.86667		0.245	1.5	0.276	1.5	0.233	0	0	0	0	0.3675	0.414	0.3495	0	0	119.483	146.346	93.378	0	0	412	6.86667
427	1.5	6.88333		0.245	1.5	0.276	1.5	0.233	0	0	0	0	0.3675	0.414	0.3495	0	0	119.85	146.76	93.7275	0	0	413	6.88333
428	1.5	6.9		0.244	1.5	0.276	1.5	0.233	0	0	0	0	0.366	0.414	0.3495	0	0	120.216	147.174	94.077	0	0	414	6.9
429	1.5	6.91667		0.244	1.5	0.275	1.5	0.233	0	0	0	0	0.366	0.4125	0.3495	0	0	120.582	147.587	94.4265	0	0	415	6.91667
430	1.5	6.93333		0.244	1.5	0.275	1.5	0.234	0	0	0	0	0.366	0.4125	0.351	0	0	120.948	147.999	94.7775	0	0	416	6.93333
431	1.5	6.95		0.243	1.5	0.275	1.5	0.234	0	0	0	0	0.3645	0.4125	0.351	0	0	121.312	148.412	95.1285	0	0	417	6.95
432	1.5	6.96667		0.243	1.5	0.275	1.5	0.234	0	0	0	0	0.3645	0.4125	0.351	0	0	121.677	148.824	95.4795	0	0	418	6.96667
433	1.5	6.98333		0.243	1.5	0.275	1.5	0.234	0	0	0	0	0.3645	0.4125	0.351	0	0	122.042	149.237	95.8305	0	0	419	6.98333
434	1.5	7		0.243	1.5	0.274	1.5	0.234	0	0	0	0	0.3645	0.411	0.351	0	0	122.406	149.648	96.1815	0	0	420	7
435	1.5	7.01667		0.243	1.5	0.274	1.5	0.234	0	0	0	0	0.3645	0.411	0.351	0	0	122.771	150.059	96.5325	0	0	421	7.01667
436	1.5	7.03333		0.243	1.5	0.274	1.5	0.234	0	0	0	0	0.3645	0.411	0.351	0	0	123.135	150.47	96.8835	0	0	422	7.03333
437	1.5	7.05		0.242	1.5	0.274	1.5	0.234	0	0	0	0	0.363	0.411	0.351	0	0	123.498	150.881	97.2345	0	0	423	7.05
438	1.5	7.06667		0.242	1.5	0.274	1.5	0.234	0	0	0	0	0.363	0.411	0.351	0	0	123.861	151.292	97.5855	0	0	424	7.06667
439	1.5	7.08333		0.242	1.5	0.274	1.5	0.251	0	0	0	0	0.363	0.411	0.3765	0	0	124.224	151.703	97.962	0	0	425	7.08333
440	1.5	7.1		0.242	1.5	0.273	1.5	0.246	0	0	0	0	0.363	0.4095	0.369	0	0	124.587	152.112	98.331	0	0	426	7.1
441	1.5	7.11667		0.242	1.5	0.273	1.5	0.241	0	0	0	0	0.363	0.4095	0.3615	0	0	124.95	152.522	98.6925	0	0	427	7.11667
442	1.5	7.13333		0.242	3.57	0.308	1.5	0.239	0	0	0	0	0.363	1.09956	0.3585	0	0	125.313	153.621	99.051	0	0	428	7.13333
443	1.5	7.15		0.242	1.5	0.297	1.5	0.238	0	0	0	0	0.363	0.4455	0.357	0	0	125.676	154.067	99.408	0	0	429	7.15
444	1.5	7.16667		0.242	1.5	0.294	1.5	0.237	0	0	0	0	0.363	0.441	0.3555	0	0	126.039	154.508	99.7635	0	0	430	7.16667
445	1.5	7.18333		0.269	1.5	0.291	1.5	0.237	0	0	0	0	0.4035	0.4365	0.3555	0	0	126.443	154.944	100.119	0	0	431	7.18333
446	1.5	7.2		0.267	1.5	0.287	1.5	0.237	0	0	0	0	0.4005	0.4305	0.3555	0	0	126.843	155.375	100.475	0	0	432	7.2
447	1.5	7.21667		0.263	1.5	0.284	1.5	0.236	0	0	0	0	0.3945	0.426	0.354	0	0	127.238	155.801	100.829	0	0	433	7.21667
448	1.5	7.23333		0.26	1.5	0.282	1.5	0.236	0	0	0	0	0.39	0.423	0.354	0	0	127.628	156.224	101.183	0	0	434	7.23333
449	1.5	7.25		0.258	1.5	0.28	1.5	0.235	0	0	0	0	0.387	0.42	0.3525	0	0	128.015	156.644	101.535	0	0	435	7.25
450	1.5	7.26667		0.256	1.5	0.279	1.5	0.235	0	0	0	0	0.384	0.4185	0.3525	0	0	128.399	157.062	101.888	0	0	436	7.26667
451	1.5	7.28333		0.254	1.5	0.277	1.5	0.234	0	0	0	0	0.381	0.4155	0.351	0	0	128.78	157.478	102.239	0	0	437	7.28333
452	1.5	7.3		0.252	1.5	0.276	1.5	0.234	0	0	0	0	0.378	0.414	0.351	0	0	129.157	157.892	102.59	0	0	438	7.3
453	1.5	7.31667		0.251	1.5	0.275	1.5	0.234	0	0	0	0	0.3765	0.4125	0.351	0	0	129.534	158.304	102.941	0	0	439	7.31667
454	1.5	7.33333		0.25	1.5	0.274	1.5	0.234	0	0	0	0	0.375	0.411	0.351	0	0	129.909	158.715	103.292	0	0	440	7.33333
455	1.5	7.35		0.249	1.5	0.274	1.5	0.234	0	0	0	0	0.3735	0.411	0.351	0	0	130.282	159.126	103.643	0	0	441	7.35
456	1.5	7.36667		0.248	1.5	0.273	1.5	0.234	0	0	0	0	0.372	0.4095	0.351	0	0	130.655	159.536	103.994	0	0	442	7.36667
457	1.5	7.38333		0.248	1.5	0.273	1.5	0.234	0	0	0	0	0.372	0.4095	0.351	0	0	131.027	159.945	104.345	0	0	443	7.38333
458	1.5	7.4		0.247	1.5	0.272	1.5	0.234	0	0	0	0	0.3705	0.408	0.351	0	0	131.397	160.353	104.696	0	0	444	7.4
459	1.5	7.41667		0.247	1.5	0.272	1.5	0.233	0	0	0	0	0.3705	0.408	0.3495	0	0	131.768	160.761	105.045	0	0	445	7.41667
460	1.5	7.43333		0.247	1.5	0.272	1.5	0.233	0	0	0	0	0.3705	0.408	0.3495	0	0	132.138	161.169	105.395	0	0	446	7.43333
461	1.5	7.45		0.246	1.5	0.271	1.5	0.233	0	0	0	0	0.369	0.4065	0.3495	0	0	132.507	161.576	105.744	0	0	447	7.45
462	1.5	7.46667		0.246	1.5	0.271	1.5	0.234	0	0	0	0	0.369	0.4065	0.351	0	0	132.876	161.982	106.095	0	0	448	7.46667
463	1.5	7.48333		0.246	1.5	0.271	1.5	0.234	0	0	0	0	0.369	0.4065	0.351	0	0	133.245	162.389	106.446	0	0	449	7.48333
464	1.5	7.5		0.246	1.5	0.271	1.5	0.234	0	0	0	0	0.369	0.4065	0.351	0	0	133.614	162.795	106.797	0	0	450	7.5
465	1.5	7.51667		0.246	1.5	0.271	1.5	0.234	0	0	0	0	0.369	0.4065	0.351	0	0	133.983	163.202	107.148	0	0	451	7.51667
466	1.5	7.53333		0.246	1.5	0.271	1.5	0.234	0	0	0	0	0.369	0.4065	0.351	0	0	134.352	163.608	107.499	0	0	452	7.53333
467	1.5	7.55		0.246	1.5	0.271	1.5	0.234	0	0	0	0	0.369	0.4065	0.351	0	0	134.721	164.015	107.85	0	0	453	7.55
468	1.5	7.56667		0.245	1.5	0.27	1.5	0.234	0	0	0	0	0.3675	0.405	0.351	0	0	135.089	164.42	108.201	0	0	454	7.56667
469	1.5	7.58333		0.245	1.5	0.27	1.5	0.249	0	0	0	0	0.3675	0.405	0.3735	0	0	135.456	164.825	108.575	0	0	455	7.58333
470	1.5	7.6		0.245	1.5	0.27	1.5	0.243	0	0	0	0	0.3675	0.405	0.3645	0	0	135.824	165.23	108.939	0	0	456	7.6
471	1.5	7.61667		0.245	1.5	0.27	1.5	0.239	0	0	0	0	0.3675	0.405	0.3585	0	0	136.191	165.635	109.298	0	0	457	7.61667
472	1.5	7.63333		0.245	1.5	1.021	1.5	0.237	0	0	0	0	0.3675	1.5315	0.3555	0	0	136.559	167.166	109.653	0	0	458	7.63333
473	1.5	7.65		0.245	1.5	0.297	1.5	0.236	0	0	0	0	0.3675	0.4455	0.354	0	0	136.926	167.612	110.007	0	0	459	7.65
474	1.5	7.66667		0.245	1.5	0.294	1.5	0.235	0	0	0	0	0.3675	0.441	0.3525	0	0	137.294	168.053	110.36	0	0	460	7.66667
475	1.5	7.68333		0.271	1.5	0.291	1.5	0.235	0	0	0	0	0.4065	0.4365	0.3525	0	0	137.7	168.489	110.712	0	0	461	7.68333
476	1.5	7.7		0.269	1.5	0.288	1.5	0.235	0	0	0	0	0.4035	0.432	0.3525	0	0	138.104	168.921	111.065	0	0	462	7.7
477	1.5	7.71667		0.266	1.5	0.286	1.5	0.235	0	0	0	0	0.399	0.429	0.3525	0	0	138.503	169.35	111.417	0	0	463	7.71667
478	1.5	7.73333		0.263	1.5	0.283	1.5	0.234	0	0	0	0	0.3945	0.4245	0.351	0	0	138.897	169.775	111.768	0	0	464	7.73333
479	1.5	7.75		0.26	1.5	0.282	1.5	0.234	0	0	0	0	0.39	0.423	0.351	0	0	139.287	170.198	112.119	0	0	465	7.75
480	1.5	7.76667		0.258	1.5	0.279	1.5	0.234	0	0	0	0	0.387	0.4185	0.351	0	0	139.674	170.616	112.47	0	0	466	7.76667
481	1.5	7.78333		0.256	1.5	0.279	1.5	0.234	0	0	0	0	0.384	0.4185	0.351	0	0	140.058	171.035	112.821	0	0	467	7.78333
482	1.5	7.8		0.254	1.5	0.278	1.5	0.234	0	0	0	0	0.381	0.417	0.351	0	0	140.439	171.452	113.172	0	0	468	7.8
483	1.5	7.81667		0.254	1.5	0.277	1.5	0.234	0	0	0	0	0.381	0.4155	0.351	0	0	140.82	171.867	113.523	0	0	469	7.81667
484	1.5	7.83333		0.253	1.5	0.276	1.5	0.234	0	0	0	0	0.3795	0.414	0.351	0	0	141.2	172.281	113.874	0	0	470	7.83333
485	1.5	7.85		0.252	1.5	0.276	1.5	0.234	0	0	0	0	0.378	0.414	0.351	0	0	141.577	172.695	114.225	0	0	471	7.85
486	1.5	7.86667		0.251	1.5	0.276	1.5	0.233	0	0	0	0	0.3765	0.414	0.3495	0	0	141.954	173.109	114.575	0	0	472	7.86667
487	1.5	7.88333		0.251	1.5	0.275	1.5	0.233	0	0	0	0	0.3765	0.4125	0.3495	0	0	142.331	173.522	114.924	0	0	473	7.88333
488	1.5	7.9		0.251	1.5	0.275	1.5	0.233	0	0	0	0	0.3765	0.4125	0.3495	0	0	142.707	173.934	115.274	0	0	474	7.9
489	1.5	7.91667		0.25	1.5	0.274	1.5	0.233	0	0	0	0	0.375	0.411	0.3495	0	0	143.082	174.345	115.623	0	0	475	7.91667
490	1.5	7.93333		0.25	1.5	0.274	1.5	0.233	0	0	0	0	0.375	0.411	0.3495	0	0	143.457	174.756	115.973	0	0	476	7.93333
491	1.5	7.95		0.249	1.5	0.274	1.5	0.233	0	0	0	0	0.3735	0.411	0.3495	0	0	143.831	175.167	116.322	0	0	477	7.95
492	1.5	7.96667		0.249	1.5	0.274	1.5	0.233	0	0	0	0	0.3735	0.411	0.3495	0	0	144.204	175.578	116.672	0	0	478	7.96667
493	1.5	7.98333		0.249	1.5	0.273	1.5	0.233	0	0	0	0	0.3735	0.4095	0.3495	0	0	144.577	175.988	117.021	0	0	479	7.98333
494	1.5	8		0.249	1.5	0.273	1.5	0.233	0	0	0	0	0.3735	0.4095	0.3495	0	0	144.951	176.397	117.371	0	0	480	8
495	1.5	8.01667		0.249	1.5	0.273	1.5	0.233	0	0	0	0	0.3735	0.4095	0.3495	0	0	145.325	176.807	117.72	0	0	481	8.01667
496	1.5	8.03333		0.249	1.5	0.272	1.5	0.233	0	0	0	0	0.3735	0.408	0.3495	0	0	145.698	177.215	118.07	0	0	482	8.03333
497	1.5	8.05		0.249	1.5	0.272	1.5	0.233	0	0	0	0	0.3735	0.408	0.3495	0	0	146.072	177.623	118.419	0	0	483	8.05
498	1.5	8.06667		0.249	1.5	0.272	1.5	0.234	0	0	0	0	0.3735	0.408	0.351	0	0	146.445	178.031	118.77	0	0	484	8.06667
499	1.5	8.08333		0.248	1.5	0.272	1.5	0.226	0	0	0	0	0.372	0.408	0.339	0	0	146.817	178.439	119.109	0	0	485	8.08333
500	1.5	8.1		0.249	1.5	0.272	1.5	0.221	0	0	0	0	0.3735	0.408	0.3315	0	0	147.191	178.847	119.441	0	0	486	8.1
501	1.5	8.11667		0.249	1.5	0.272	1.5	0.218	0	0	0	0	0.3735	0.408	0.327	0	0	147.564	179.255	119.768	0	0	487	8.11667
502	1.5	8.13333		0.249	3.62	0.309	1.5	0.216	0	0	0	0	0.3735	1.11858	0.324	0	0	147.938	180.373	120.092	0	0	488	8.13333
503	1.5	8.15		0.249	1.5	0.296	1.5	0.215	0	0	0	0	0.3735	0.444	0.3225	0	0	148.311	180.817	120.414	0	0	489	8.15
504	1.5	8.16667		0.249	1.5	0.293	1.5	0.214	0	0	0	0	0.3735	0.4395	0.321	0	0	148.685	181.257	120.735	0	0	490	8.16667
505	1.5	8.18333		0.274	1.5	0.289	1.5	0.213	0	0	0	0	0.411	0.4335	0.3195	0	0	149.096	181.69	121.055	0	0	491	8.18333
506	1.5	8.2		0.272	1.5	0.286	1.5	0.213	0	0	0	0	0.408	0.429	0.3195	0	0	149.504	182.119	121.374	0	0	492	8.2
507	1.5	8.21667		0.268	1.5	0.283	1.5	0.213	0	0	0	0	0.402	0.4245	0.3195	0	0	149.906	182.544	121.694	0	0	493	8.21667
508	1.5	8.23333		0.266	1.5	0.281	1.5	0.213	0	0	0	0	0.399	0.4215	0.3195	0	0	150.305	182.965	122.013	0	0	494	8.23333
509	1.5	8.25		0.263	1.5	0.28	1.5	0.213	0	0	0	0	0.3945	0.42	0.3195	0	0	150.699	183.385	122.333	0	0	495	8.25
510	1.5	8.26667		0.261	1.5	0.279	1.5	0.213	0	0	0	0	0.3915	0.4185	0.3195	0	0	151.091	183.804	122.652	0	0	496	8.26667
511	1.5	8.28333		0.259	1.5	0.278	1.5	0.213	0	0	0	0	0.3885	0.417	0.3195	0	0	151.479	184.221	122.972	0	0	497	8.28333
512	1.5	8.3		0.258	1.5	0.277	1.5	0.213	0	0	0	0	0.387	0.4155	0.3195	0	0	151.866	184.636	123.291	0	0	498	8.3
513	1.5	8.31667		0.257	1.5	0.276	1.5	0.213	0	0	0	0	0.3855	0.414	0.3195	0	0	152.252	185.05	123.611	0	0	499	8.31667
514	1.5	8.33333		0.256	1.5	0.276	1.5	0.213	0	0	0	0	0.384	0.414	0.3195	0	0	152.636	185.464	123.93	0	0	500	8.33333
515	1.5	8.35		0.255	1.5	0.276	1.5	0.213	0	0	0	0	0.3825	0.414	0.3195	0	0	153.018	185.878	124.25	0	0	501	8.35
516	1.5	8.36667		0.254	1.5	0.276	1.5	0.213	0	0	0	0	0.381	0.414	0.3195	0	0	153.399	186.292	124.569	0	0	502	8.36667
517	1.5	8.38333		0.254	1.5	0.276	1.5	0.213	0	0	0	0	0.381	0.414	0.3195	0	0	153.78	186.706	124.889	0	0	503	8.38333
518	1.5	8.4		0.253	1.5	0.276	1.5	0.213	0	0	0	0	0.3795	0.414	0.3195	0	0	154.16	187.12	125.208	0	0	504	8.4
519	1.5	8.41667		0.253	1.5	0.276	1.5	0.213	0	0	0	0	0.3795	0.414	0.3195	0	0	154.539	187.534	125.528	0	0	505	8.41667
520	1.5	8.43333		0.252	1.5	0.277	1.5	0.213	0	0	0	0	0.378	0.4155	0.3195	0	0	154.917	187.95	125.847	0	0	506	8.43333
521	1.5	8.45		0.252	1.5	0.277	1.5	0.213	0	0	0	0	0.378	0.4155	0.3195	0	0	155.295	188.365	126.167	0	0	507	8.45
522	1.5	8.46667		0.252	1.5	0.277	1.5	0.213	0	0	0	0	0.378	0.4155	0.3195	0	0	155.673	188.781	126.486	0	0	508	8.46667
523	1.5	8.48333		0.251	1.5	0.277	1.5	0.213	0	0	0	0	0.3765	0.4155	0.3195	0	0	156.05	189.196	126.806	0	0	509	8.48333
524	1.5	8.5		0.252	1.5	0.277	1.5	0.212	0	0	0	0	0.378	0.4155	0.318	0	0	156.428	189.612	127.124	0	0	510	8.5
525	1.5	8.51667		0.252	1.5	0.276	1.5	0.213	0	0	0	0	0.378	0.414	0.3195	0	0	156.805	190.026	127.443	0	0	511	8.51667
526	1.5	8.53333		0.252	1.5	0.276	1.5	0.213	0	0	0	0	0.378	0.414	0.3195	0	0	157.184	190.44	127.763	0	0	512	8.53333
527	1.5	8.55		0.252	1.5	0.275	1.5	0.213	0	0	0	0	0.378	0.4125	0.3195	0	0	157.561	190.852	128.082	0	0	513	8.55
528	1.5	8.56667		0.252	1.5	0.275	1.5	0.213	0	0	0	0	0.378	0.4125	0.3195	0	0	157.94	191.265	128.402	0	0	514	8.56667
529	1.5	8.58333		0.251	1.5	0.275	1.5	0.192	0	0	0	0	0.3765	0.4125	0.288	0	0	158.316	191.677	128.69	0	0	515	8.58333
530	1.5	8.6		0.251	1.5	0.274	1.5	0.219	0	0	0	0	0.3765	0.411	0.3285	0	0	158.692	192.088	129.018	0	0	516	8.6
531	1.5	8.61667		0.251	1.5	0.274	1.5	0.222	0	0	0	0	0.3765	0.411	0.333	0	0	159.069	192.499	129.351	0	0	517	8.61667
532	1.5	8.63333		0.251	1.5	0.933	1.5	0.223	0	0	0	0	0.3765	1.3995	0.3345	0	0	159.446	193.899	129.686	0	0	518	8.63333
533	1.5	8.65		0.251	1.5	0.297	1.5	0.224	0	0	0	0	0.3765	0.4455	0.336	0	0	159.822	194.344	130.022	0	0	519	8.65
534	1.5	8.66667		0.251	1.5	0.294	1.5	0.224	0	0	0	0	0.3765	0.441	0.336	0	0	160.198	194.785	130.358	0	0	520	8.66667
535	1.5	8.68333		0.276	1.5	0.29	1.5	0.224	0	0	0	0	0.414	0.435	0.336	0	0	160.612	195.22	130.694	0	0	521	8.68333
536	1.5	8.7		0.274	1.5	0.287	1.5	0.225	0	0	0	0	0.411	0.4305	0.3375	0	0	161.023	195.651	131.031	0	0	522	8.7
537	1.5	8.71667		0.27	1.5	0.285	1.5	0.225	0	0	0	0	0.405	0.4275	0.3375	0	0	161.428	196.078	131.369	0	0	523	8.71667
538	1.5	8.73333		0.268	1.5	0.283	1.5	0.225	0	0	0	0	0.402	0.4245	0.3375	0	0	161.83	196.503	131.706	0	0	524	8.73333
539	1.5	8.75		0.265	1.5	0.28	1.5	0.225	0	0	0	0	0.3975	0.42	0.3375	0	0	162.228	196.923	132.044	0	0	525	8.75
540	1.5	8.76667		0.263	1.5	0.279	1.5	0.226	0	0	0	0	0.3945	0.4185	0.339	0	0	162.622	197.341	132.383	0	0	526	8.76667
541	1.5	8.78333		0.262	1.5	0.278	1.5	0.226	0	0	0	0	0.393	0.417	0.339	0	0	163.015	197.758	132.722	0	0	527	8.78333
542	1.5	8.8		0.26	1.5	0.277	1.5	0.226	0	0	0	0	0.39	0.4155	0.339	0	0	163.405	198.174	133.061	0	0	528	8.8
543	1.5	8.81667		0.259	1.5	0.276	1.5	0.226	0	0	0	0	0.3885	0.414	0.339	0	0	163.794	198.588	133.4	0	0	529	8.81667
544	1.5	8.83333		0.259	1.5	0.275	1.5	0.226	0	0	0	0	0.3885	0.4125	0.339	0	0	164.182	199	133.739	0	0	530	8.83333
545	1.5	8.85		0.258	1.5	0.274	1.5	0.226	0	0	0	0	0.387	0.411	0.339	0	0	164.569	199.411	134.078	0	0	531	8.85
546	1.5	8.86667		0.257	1.5	0.274	1.5	0.226	0	0	0	0	0.3855	0.411	0.339	0	0	164.955	199.822	134.417	0	0	532	8.86667
547	1.5	8.88333		0.257	1.5	0.273	1.5	0.227	0	0	0	0	0.3855	0.4095	0.3405	0	0	165.34	200.232	134.757	0	0	533	8.88333
548	1.5	8.9		0.256	1.5	0.273	1.5	0.227	0	0	0	0	0.384	0.4095	0.3405	0	0	165.724	200.641	135.098	0	0	534	8.9
549	1.5	8.91667		0.256	1.5	0.273	1.5	0.227	0	0	0	0	0.384	0.4095	0.3405	0	0	166.108	201.051	135.438	0	0	535	8.91667
550	1.5	8.93333		0.256	1.5	0.272	1.5	0.227	0	0	0	0	0.384	0.408	0.3405	0	0	166.492	201.459	135.779	0	0	536	8.93333
551	1.5	8.95		0.255	1.5	0.272	1.5	0.227	0	0	0	0	0.3825	0.408	0.3405	0	0	166.875	201.867	136.119	0	0	537	8.95
552	1.5	8.96667		0.255	1.5	0.271	1.5	0.227	0	0	0	0	0.3825	0.4065	0.3405	0	0	167.257	202.273	136.46	0	0	538	8.96667
553	1.5	8.98333		0.255	1.5	0.271	1.5	0.227	0	0	0	0	0.3825	0.4065	0.3405	0	0	167.64	202.68	136.8	0	0	539	8.98333
554	1.5	9		0.255	1.5	0.27	1.5	0.227	0	0	0	0	0.3825	0.405	0.3405	0	0	168.022	203.085	137.141	0	0	540	9
555	1.5	9.01667		0.254	1.5	0.27	1.5	0.227	0	0	0	0	0.381	0.405	0.3405	0	0	168.403	203.49	137.481	0	0	541	9.01667
556	1.5	9.03333		0.254	1.5	0.269	1.5	0.227	0	0	0	0	0.381	0.4035	0.3405	0	0	168.784	203.893	137.822	0	0	542	9.03333
557	1.5	9.05		0.254	1.5	0.269	1.5	0.227	0	0	0	0	0.381	0.4035	0.3405	0	0	169.165	204.297	138.162	0	0	543	9.05
558	1.5	9.06667		0.254	1.5	0.269	1.5	0.227	0	0	0	0	0.381	0.4035	0.3405	0	0	169.546	204.7	138.503	0	0	544	9.06667
559	1.5	9.08333		0.254	1.5	0.269	1.5	0.235	0	0	0	0	0.381	0.4035	0.3525	0	0	169.927	205.104	138.855	0	0	545	9.08333
560	1.5	9.1		0.254	1.5	0.269	1.5	0.226	0	0	0	0	0.381	0.4035	0.339	0	0	170.308	205.507	139.194	0	0	546	9.1
561	1.5	9.11667		0.254	1.5	0.269	1.5	0.222	0	0	0	0	0.381	0.4035	0.333	0	0	170.689	205.911	139.527	0	0	547	9.11667
562	1.5	9.13333		0.254	3.36	0.309	1.5	0.219	0	0	0	0	0.381	1.03824	0.3285	0	0	171.07	206.949	139.856	0	0	548	9.13333
563	1.5	9.15		0.254	1.5	0.292	1.5	0.218	0	0	0	0	0.381	0.438	0.327	0	0	171.451	207.387	140.183	0	0	549	9.15
564	1.5	9.16667		0.254	1.5	0.29	1.5	0.218	0	0	0	0	0.381	0.435	0.327	0	0	171.832	207.822	140.51	0	0	550	9.16667
565	1.5	9.18333		0.278	1.5	0.286	1.5	0.217	0	0	0	0	0.417	0.429	0.3255	0	0	172.249	208.251	140.835	0	0	551	9.18333
566	1.5	9.2		0.276	1.5	0.283	1.5	0.217	0	0	0	0	0.414	0.4245	0.3255	0	0	172.663	208.676	141.161	0	0	552	9.2
567	1.5	9.21667		0.273	1.5	0.281	1.5	0.216	0	0	0	0	0.4095	0.4215	0.324	0	0	173.073	209.097	141.485	0	0	553	9.21667
568	1.5	9.23333		0.27	1.5	0.279	1.5	0.216	0	0	0	0	0.405	0.4185	0.324	0	0	173.478	209.516	141.809	0	0	554	9.23333
569	1.5	9.25		0.267	1.5	0.277	1.5	0.215	0	0	0	0	0.4005	0.4155	0.3225	0	0	173.878	209.931	142.131	0	0	555	9.25
570	1.5	9.26667		0.265	1.5	0.275	1.5	0.215	0	0	0	0	0.3975	0.4125	0.3225	0	0	174.276	210.344	142.454	0	0	556	9.26667
571	1.5	9.28333		0.264	1.5	0.274	1.5	0.215	0	0	0	0	0.396	0.411	0.3225	0	0	174.672	210.755	142.776	0	0	557	9.28333
572	1.5	9.3		0.262	1.5	0.272	1.5	0.215	0	0	0	0	0.393	0.408	0.3225	0	0	175.065	211.163	143.099	0	0	558	9.3
573	1.5	9.31667		0.261	1.5	0.271	1.5	0.215	0	0	0	0	0.3915	0.4065	0.3225	0	0	175.456	211.569	143.421	0	0	559	9.31667
574	1.5	9.33333		0.26	1.5	0.27	1.5	0.215	0	0	0	0	0.39	0.405	0.3225	0	0	175.846	211.974	143.744	0	0	560	9.33333
575	1.5	9.35		0.259	1.5	0.27	1.5	0.215	0	0	0	0	0.3885	0.405	0.3225	0	0	176.235	212.379	144.066	0	0	561	9.35
576	1.5	9.36667		0.259	1.5	0.269	1.5	0.215	0	0	0	0	0.3885	0.4035	0.3225	0	0	176.623	212.783	144.389	0	0	562	9.36667
577	1.5	9.38333		0.258	1.5	0.269	1.5	0.215	0	0	0	0	0.387	0.4035	0.3225	0	0	177.01	213.186	144.711	0	0	563	9.38333
578	1.5	9.4		0.258	1.5	0.268	1.5	0.215	0	0	0	0	0.387	0.402	0.3225	0	0	177.397	213.588	145.034	0	0	564	9.4
579	1.5	9.41667		0.258	1.5	0.268	1.5	0.215	0	0	0	0	0.387	0.402	0.3225	0	0	177.784	213.99	145.356	0	0	565	9.41667
580	1.5	9.43333		0.257	1.5	0.267	1.5	0.215	0	0	0	0	0.3855	0.4005	0.3225	0	0	178.17	214.391	145.679	0	0	566	9.43333
581	1.5	9.45		0.257	1.5	0.267	1.5	0.215	0	0	0	0	0.3855	0.4005	0.3225	0	0	178.555	214.791	146.001	0	0	567	9.45
582	1.5	9.46667		0.257	1.5	0.267	1.5	0.215	0	0	0	0	0.3855	0.4005	0.3225	0	0	178.941	215.192	146.324	0	0	568	9.46667
583	1.5	9.48333		0.257	1.5	0.267	1.5	0.215	0	0	0	0	0.3855	0.4005	0.3225	0	0	179.326	215.592	146.646	0	0	569	9.48333
584	1.5	9.5		0.257	1.5	0.267	1.5	0.215	0	0	0	0	0.3855	0.4005	0.3225	0	0	179.712	215.993	146.969	0	0	570	9.5
585	1.5	9.51667		0.257	1.5	0.267	1.5	0.215	0	0	0	0	0.3855	0.4005	0.3225	0	0	180.097	216.393	147.291	0	0	571	9.51667
586	1.5	9.53333		0.257	1.5	0.267	1.5	0.215	0	0	0	0	0.3855	0.4005	0.3225	0	0	180.483	216.794	147.614	0	0	572	9.53333
587	1.5	9.55		0.257	1.5	0.267	1.5	0.215	0	0	0	0	0.3855	0.4005	0.3225	0	0	180.868	217.194	147.936	0	0	573	9.55
588	1.5	9.56667		0.256	1.5	0.267	1.5	0.215	0	0	0	0	0.384	0.4005	0.3225	0	0	181.252	217.595	148.259	0	0	574	9.56667
589	1.5	9.58333		0.257	1.5	0.267	1.5	0.238	0	0	0	0	0.3855	0.4005	0.357	0	0	181.638	217.995	148.616	0	0	575	9.58333
590	1.5	9.6		0.256	1.5	0.266	1.5	0.237	0	0	0	0	0.384	0.399	0.3555	0	0	182.022	218.394	148.971	0	0	576	9.6
591	1.5	9.61667		0.256	1.5	0.266	1.5	0.235	0	0	0	0	0.384	0.399	0.3525	0	0	182.406	218.793	149.324	0	0	577	9.61667
592	1.5	9.63333		0.256	1.5	0.828	1.5	0.234	0	0	0	0	0.384	1.242	0.351	0	0	182.79	220.035	149.675	0	0	578	9.63333
593	1.5	9.65		0.256	1.5	0.29	1.5	0.233	0	0	0	0	0.384	0.435	0.3495	0	0	183.174	220.47	150.024	0	0	579	9.65
594	1.5	9.66667		0.256	1.5	0.288	1.5	0.233	0	0	0	0	0.384	0.432	0.3495	0	0	183.558	220.902	150.374	0	0	580	9.66667
595	1.5	9.68333		0.279	1.5	0.285	1.5	0.233	0	0	0	0	0.4185	0.4275	0.3495	0	0	183.976	221.33	150.723	0	0	581	9.68333
596	1.5	9.7		0.277	1.5	0.284	1.5	0.233	0	0	0	0	0.4155	0.426	0.3495	0	0	184.392	221.756	151.073	0	0	582	9.7
597	1.5	9.71667		0.274	1.5	0.284	1.5	0.232	0	0	0	0	0.411	0.426	0.348	0	0	184.803	222.182	151.421	0	0	583	9.71667
598	1.5	9.73333		0.271	1.5	0.282	1.5	0.232	0	0	0	0	0.4065	0.423	0.348	0	0	185.209	222.605	151.769	0	0	584	9.73333
599	1.5	9.75		0.269	1.5	0.281	1.5	0.232	0	0	0	0	0.4035	0.4215	0.348	0	0	185.613	223.026	152.117	0	0	585	9.75
600	1.5	9.76667		0.267	1.5	0.28	1.5	0.232	0	0	0	0	0.4005	0.42	0.348	0	0	186.013	223.446	152.465	0	0	586	9.76667
601	1.5	9.78333		0.265	1.5	0.28	1.5	0.232	0	0	0	0	0.3975	0.42	0.348	0	0	186.411	223.866	152.813	0	0	587	9.78333
602	1.5	9.8		0.264	1.5	0.279	1.5	0.232	0	0	0	0	0.396	0.4185	0.348	0	0	186.807	224.285	153.161	0	0	588	9.8
603	1.5	9.81667		0.263	1.5	0.279	1.5	0.232	0	0	0	0	0.3945	0.4185	0.348	0	0	187.201	224.703	153.509	0	0	589	9.81667
604	1.5	9.83333		0.262	1.5	0.279	1.5	0.232	0	0	0	0	0.393	0.4185	0.348	0	0	187.594	225.122	153.857	0	0	590	9.83333
605	1.5	9.85		0.262	1.5	0.279	1.5	0.232	0	0	0	0	0.393	0.4185	0.348	0	0	187.987	225.54	154.205	0	0	591	9.85
606	1.5	9.86667		0.261	1.5	0.278	1.5	0.232	0	0	0	0	0.3915	0.417	0.348	0	0	188.379	225.957	154.553	0	0	592	9.86667
607	1.5	9.88333		0.261	1.5	0.278	1.5	0.232	0	0	0	0	0.3915	0.417	0.348	0	0	188.77	226.374	154.901	0	0	593	9.88333
608	1.5	9.9		0.26	1.5	0.278	1.5	0.232	0	0	0	0	0.39	0.417	0.348	0	0	189.16	226.791	155.249	0	0	594	9.9
609	1.5	9.91667		0.26	1.5	0.278	1.5	0.232	0	0	0	0	0.39	0.417	0.348	0	0	189.55	227.208	155.597	0	0	595	9.91667
610	1.5	9.93333		0.26	1.5	0.278	1.5	0.232	0	0	0	0	0.39	0.417	0.348	0	0	189.94	227.625	155.945	0	0	596	9.93333
611	1.5	9.95		0.26	1.5	0.278	1.5	0.232	0	0	0	0	0.39	0.417	0.348	0	0	190.33	228.042	156.293	0	0	597	9.95
612	1.5	9.96667		0.259	1.5	0.278	1.5	0.232	0	0	0	0	0.3885	0.417	0.348	0	0	190.719	228.459	156.641	0	0	598	9.96667
613	1.5	9.98333		0.259	1.5	0.279	1.5	0.232	0	0	0	0	0.3885	0.4185	0.348	0	0	191.107	228.878	156.989	0	0	599	9.98333
614	1.5	10		0.259	1.5	0.279	1.5	0.232	0	0	0	0	0.3885	0.4185	0.348	0	0	191.496	229.296	157.337	0	0	600	10
615	1.5	10.0167		0.259	1.5	0.279	1.5	0.232	0	0	0	0	0.3885	0.4185	0.348	0	0	191.884	229.715	157.685	0	0	601	10.0167
616	1.5	10.0333		0.259	1.5	0.278	1.5	0.231	0	0	0	0	0.3885	0.417	0.3465	0	0	192.273	230.132	158.031	0	0	602	10.0333
617	1.5	10.05		0.259	1.5	0.278	1.5	0.232	0	0	0	0	0.3885	0.417	0.348	0	0	192.661	230.549	158.379	0	0	603	10.05
618	1.5	10.0667		0.259	1.5	0.279	1.5	0.232	0	0	0	0	0.3885	0.4185	0.348	0	0	193.05	230.967	158.727	0	0	604	10.0667
619	1.5	10.0833		0.259	1.5	0.279	1.5	0.23	0	0	0	0	0.3885	0.4185	0.345	0	0	193.438	231.386	159.072	0	0	605	10.0833
620	1.5	10.1		0.259	1.5	0.278	1.5	0.226	0	0	0	0	0.3885	0.417	0.339	0	0	193.827	231.803	159.411	0	0	606	10.1
621	1.5	10.1167		0.259	1.5	0.279	1.5	0.223	0	0	0	0	0.3885	0.4185	0.3345	0	0	194.215	232.221	159.746	0	0	607	10.1167
622	1.5	10.1333		0.259	3.03	0.336	1.5	0.221	0	0	0	0	0.3885	1.01808	0.3315	0	0	194.604	233.239	160.077	0	0	608	10.1333
623	1.5	10.15		0.258	1.5	0.297	1.5	0.22	0	0	0	0	0.387	0.4455	0.33	0	0	194.991	233.685	160.407	0	0	609	10.15
624	1.5	10.1667		0.258	1.5	0.295	1.5	0.22	0	0	0	0	0.387	0.4425	0.33	0	0	195.378	234.127	160.737	0	0	610	10.1667
625	1.5	10.1833		0.281	1.5	0.292	1.5	0.219	0	0	0	0	0.4215	0.438	0.3285	0	0	195.799	234.565	161.066	0	0	611	10.1833
626	1.5	10.2		0.279	1.5	0.29	1.5	0.219	0	0	0	0	0.4185	0.435	0.3285	0	0	196.218	235	161.394	0	0	612	10.2
627	1.5	10.2167		0.276	1.5	0.287	1.5	0.219	0	0	0	0	0.414	0.4305	0.3285	0	0	196.632	235.431	161.723	0	0	613	10.2167
628	1.5	10.2333		0.273	1.5	0.286	1.5	0.219	0	0	0	0	0.4095	0.429	0.3285	0	0	197.041	235.86	162.051	0	0	614	10.2333
629	1.5	10.25		0.271	1.5	0.284	1.5	0.219	0	0	0	0	0.4065	0.426	0.3285	0	0	197.448	236.286	162.38	0	0	615	10.25
630	1.5	10.2667		0.269	1.5	0.283	1.5	0.219	0	0	0	0	0.4035	0.4245	0.3285	0	0	197.851	236.71	162.708	0	0	616	10.2667
631	1.5	10.2833		0.268	1.5	0.282	1.5	0.218	0	0	0	0	0.402	0.423	0.327	0	0	198.253	237.133	163.035	0	0	617	10.2833
632	1.5	10.3		0.266	1.5	0.281	1.5	0.218	0	0	0	0	0.399	0.4215	0.327	0	0	198.652	237.555	163.362	0	0	618	10.3
633	1.5	10.3167		0.265	1.5	0.28	1.5	0.218	0	0	0	0	0.3975	0.42	0.327	0	0	199.05	237.975	163.689	0	0	619	10.3167
634	1.5	10.3333		0.264	1.5	0.28	1.5	0.219	0	0	0	0	0.396	0.42	0.3285	0	0	199.446	238.395	164.018	0	0	620	10.3333
635	1.5	10.35		0.264	1.5	0.279	1.5	0.219	0	0	0	0	0.396	0.4185	0.3285	0	0	199.842	238.813	164.346	0	0	621	10.35
636	1.5	10.3667		0.263	1.5	0.279	1.5	0.218	0	0	0	0	0.3945	0.4185	0.327	0	0	200.236	239.232	164.673	0	0	622	10.3667
637	1.5	10.3833		0.263	1.5	0.279	1.5	0.218	0	0	0	0	0.3945	0.4185	0.327	0	0	200.631	239.65	165	0	0	623	10.3833
638	1.5	10.4		0.262	1.5	0.279	1.5	0.218	0	0	0	0	0.393	0.4185	0.327	0	0	201.024	240.069	165.327	0	0	624	10.4
639	1.5	10.4167		0.262	1.5	0.279	1.5	0.218	0	0	0	0	0.393	0.4185	0.327	0	0	201.417	240.487	165.654	0	0	625	10.4167
640	1.5	10.4333		0.262	1.5	0.279	1.5	0.218	0	0	0	0	0.393	0.4185	0.327	0	0	201.81	240.906	165.981	0	0	626	10.4333
641	1.5	10.45		0.262	1.5	0.279	1.5	0.218	0	0	0	0	0.393	0.4185	0.327	0	0	202.203	241.324	166.308	0	0	627	10.45
642	1.5	10.4667		0.262	1.5	0.278	1.5	0.218	0	0	0	0	0.393	0.417	0.327	0	0	202.596	241.741	166.635	0	0	628	10.4667
643	1.5	10.4833		0.262	1.5	0.278	1.5	0.218	0	0	0	0	0.393	0.417	0.327	0	0	202.989	242.158	166.962	0	0	629	10.4833
644	1.5	10.5		0.262	1.5	0.277	1.5	0.218	0	0	0	0	0.393	0.4155	0.327	0	0	203.382	242.574	167.289	0	0	630	10.5
645	1.5	10.5167		0.261	1.5	0.277	1.5	0.218	0	0	0	0	0.3915	0.4155	0.327	0	0	203.773	242.989	167.616	0	0	631	10.5167
646	1.5	10.5333		0.261	1.5	0.277	1.5	0.218	0	0	0	0	0.3915	0.4155	0.327	0	0	204.165	243.405	167.943	0	0	632	10.5333
647	1.5	10.55		0.261	1.5	0.277	1.5	0.219	0	0	0	0	0.3915	0.4155	0.3285	0	0	204.556	243.82	168.272	0	0	633	10.55
648	1.5	10.5667		0.26	1.5	0.276	1.5	0.219	0	0	0	0	0.39	0.414	0.3285	0	0	204.946	244.234	168.6	0	0	634	10.5667
649	1.5	10.5833		0.26	1.5	0.276	1.5	0.211	0	0	0	0	0.39	0.414	0.3165	0	0	205.336	244.648	168.917	0	0	635	10.5833
650	1.5	10.6		0.26	1.5	0.276	1.5	0.223	0	0	0	0	0.39	0.414	0.3345	0	0	205.726	245.062	169.251	0	0	636	10.6
651	1.5	10.6167		0.26	1.5	0.276	1.5	0.225	0	0	0	0	0.39	0.414	0.3375	0	0	206.116	245.476	169.589	0	0	637	10.6167
652	1.5	10.6333		0.26	1.64	0.296	1.5	0.225	0	0	0	0	0.39	0.48544	0.3375	0	0	206.506	245.962	169.926	0	0	638	10.6333
653	1.5	10.65		0.26	1.5	0.297	1.5	0.226	0	0	0	0	0.39	0.4455	0.339	0	0	206.896	246.407	170.265	0	0	639	10.65
654	1.5	10.6667		0.26	1.5	0.294	1.5	0.226	0	0	0	0	0.39	0.441	0.339	0	0	207.286	246.848	170.604	0	0	640	10.6667
655	1.5	10.6833		0.282	1.5	0.291	1.5	0.227	0	0	0	0	0.423	0.4365	0.3405	0	0	207.709	247.285	170.945	0	0	641	10.6833
656	1.5	10.7		0.28	1.5	0.288	1.5	0.227	0	0	0	0	0.42	0.432	0.3405	0	0	208.129	247.717	171.285	0	0	642	10.7
657	1.5	10.7167		0.277	1.5	0.286	1.5	0.227	0	0	0	0	0.4155	0.429	0.3405	0	0	208.545	248.146	171.626	0	0	643	10.7167
658	1.5	10.7333		0.274	1.5	0.284	1.5	0.227	0	0	0	0	0.411	0.426	0.3405	0	0	208.956	248.572	171.966	0	0	644	10.7333
659	1.5	10.75		0.272	1.5	0.282	1.5	0.227	0	0	0	0	0.408	0.423	0.3405	0	0	209.364	248.995	172.307	0	0	645	10.75
660	1.5	10.7667		0.27	1.5	0.281	1.5	0.227	0	0	0	0	0.405	0.4215	0.3405	0	0	209.769	249.416	172.647	0	0	646	10.7667
661	1.5	10.7833		0.268	1.5	0.28	1.5	0.227	0	0	0	0	0.402	0.42	0.3405	0	0	210.171	249.836	172.988	0	0	647	10.7833
662	1.5	10.8		0.267	1.5	0.279	1.5	0.227	0	0	0	0	0.4005	0.4185	0.3405	0	0	210.571	250.255	173.328	0	0	648	10.8
663	1.5	10.8167		0.266	1.5	0.279	1.5	0.227	0	0	0	0	0.399	0.4185	0.3405	0	0	210.97	250.673	173.669	0	0	649	10.8167
664	1.5	10.8333		0.265	1.5	0.278	1.5	0.227	0	0	0	0	0.3975	0.417	0.3405	0	0	211.368	251.09	174.009	0	0	650	10.8333
665	1.5	10.85		0.265	1.5	0.277	1.5	0.228	0	0	0	0	0.3975	0.4155	0.342	0	0	211.765	251.506	174.351	0	0	651	10.85
666	1.5	10.8667		0.264	1.5	0.277	1.5	0.228	0	0	0	0	0.396	0.4155	0.342	0	0	212.161	251.921	174.693	0	0	652	10.8667
667	1.5	10.8833		0.264	1.5	0.277	1.5	0.228	0	0	0	0	0.396	0.4155	0.342	0	0	212.557	252.337	175.035	0	0	653	10.8833
668	1.5	10.9		0.264	1.5	0.276	1.5	0.228	0	0	0	0	0.396	0.414	0.342	0	0	212.953	252.751	175.377	0	0	654	10.9
669	1.5	10.9167		0.263	1.5	0.276	1.5	0.228	0	0	0	0	0.3945	0.414	0.342	0	0	213.348	253.165	175.719	0	0	655	10.9167
670	1.5	10.9333		0.263	1.5	0.275	1.5	0.229	0	0	0	0	0.3945	0.4125	0.3435	0	0	213.742	253.577	176.063	0	0	656	10.9333
671	1.5	10.95		0.263	1.5	0.275	1.5	0.229	0	0	0	0	0.3945	0.4125	0.3435	0	0	214.137	253.99	176.406	0	0	657	10.95
672	1.5	10.9667		0.263	1.5	0.274	1.5	0.229	0	0	0	0	0.3945	0.411	0.3435	0	0	214.531	254.401	176.75	0	0	658	10.9667
673	1.5	10.9833		0.263	1.5	0.274	1.5	0.229	0	0	0	0	0.3945	0.411	0.3435	0	0	214.926	254.812	177.093	0	0	659	10.9833
674	1.5	11		0.263	1.5	0.274	1.5	0.229	0	0	0	0	0.3945	0.411	0.3435	0	0	215.32	255.223	177.437	0	0	660	11
675	1.5	11.0167		0.263	1.5	0.274	1.5	0.229	0	0	0	0	0.3945	0.411	0.3435	0	0	215.715	255.634	177.78	0	0	661	11.0167
676	1.5	11.0333		0.263	1.5	0.273	1.5	0.229	0	0	0	0	0.3945	0.4095	0.3435	0	0	216.109	256.043	178.124	0	0	662	11.0333
677	1.5	11.05		0.263	1.5	0.273	1.5	0.229	0	0	0	0	0.3945	0.4095	0.3435	0	0	216.504	256.453	178.467	0	0	663	11.05
678	1.5	11.0667		0.263	1.5	0.273	1.5	0.229	0	0	0	0	0.3945	0.4095	0.3435	0	0	216.898	256.862	178.811	0	0	664	11.0667
679	1.5	11.0833		0.263	1.5	0.272	1.5	0.228	0	0	0	0	0.3945	0.408	0.342	0	0	217.293	257.27	179.153	0	0	665	11.0833
680	1.5	11.1		0.263	1.5	0.272	1.5	0.223	0	0	0	0	0.3945	0.408	0.3345	0	0	217.687	257.678	179.487	0	0	666	11.1
681	1.5	11.1167		0.263	1.5	0.272	1.5	0.219	0	0	0	0	0.3945	0.408	0.3285	0	0	218.082	258.086	179.816	0	0	667	11.1167
682	1.5	11.1333		0.263	2.75	0.428	1.5	0.217	0	0	0	0	0.3945	1.177	0.3255	0	0	218.476	259.263	180.141	0	0	668	11.1333
683	1.5	11.15		0.262	1.5	0.294	1.5	0.216	0	0	0	0	0.393	0.441	0.324	0	0	218.869	259.704	180.465	0	0	669	11.15
684	1.5	11.1667		0.262	1.5	0.293	1.5	0.216	0	0	0	0	0.393	0.4395	0.324	0	0	219.262	260.144	180.789	0	0	670	11.1667
685	1.5	11.1833		0.284	1.5	0.291	1.5	0.216	0	0	0	0	0.426	0.4365	0.324	0	0	219.688	260.58	181.113	0	0	671	11.1833
686	1.5	11.2		0.282	1.5	0.288	1.5	0.216	0	0	0	0	0.423	0.432	0.324	0	0	220.111	261.012	181.437	0	0	672	11.2
687	1.5	11.2167		0.279	1.5	0.286	1.5	0.215	0	0	0	0	0.4185	0.429	0.3225	0	0	220.53	261.441	181.76	0	0	673	11.2167
688	1.5	11.2333		0.276	1.5	0.283	1.5	0.215	0	0	0	0	0.414	0.4245	0.3225	0	0	220.944	261.866	182.082	0	0	674	11.2333
689	1.5	11.25		0.274	1.5	0.282	1.5	0.215	0	0	0	0	0.411	0.423	0.3225	0	0	221.355	262.289	182.405	0	0	675	11.25
690	1.5	11.2667		0.273	1.5	0.273	1.5	0.214	0	0	0	0	0.4095	0.4095	0.321	0	0	221.764	262.698	182.726	0	0	676	11.2667
691	1.5	11.2833		0.271	1.5	0.277	1.5	0.214	0	0	0	0	0.4065	0.4155	0.321	0	0	222.171	263.114	183.047	0	0	677	11.2833
692	1.5	11.3		0.27	1.5	0.277	1.5	0.214	0	0	0	0	0.405	0.4155	0.321	0	0	222.576	263.529	183.368	0	0	678	11.3
693	1.5	11.3167		0.269	1.5	0.276	1.5	0.214	0	0	0	0	0.4035	0.414	0.321	0	0	222.979	263.943	183.689	0	0	679	11.3167
694	1.5	11.3333		0.268	1.5	0.276	1.5	0.214	0	0	0	0	0.402	0.414	0.321	0	0	223.381	264.357	184.01	0	0	680	11.3333
695	1.5	11.35		0.268	1.5	0.275	1.5	0.214	0	0	0	0	0.402	0.4125	0.321	0	0	223.783	264.77	184.331	0	0	681	11.35
696	1.5	11.3667		0.267	1.5	0.275	1.5	0.214	0	0	0	0	0.4005	0.4125	0.321	0	0	224.184	265.182	184.652	0	0	682	11.3667
697	1.5	11.3833		0.266	1.5	0.274	1.5	0.213	0	0	0	0	0.399	0.411	0.3195	0	0	224.583	265.593	184.971	0	0	683	11.3833
698	1.5	11.4		0.266	1.5	0.274	1.5	0.212	0	0	0	0	0.399	0.411	0.318	0	0	224.982	266.004	185.289	0	0	684	11.4
699	1.5	11.4167		0.266	1.5	0.274	1.5	0.212	0	0	0	0	0.399	0.411	0.318	0	0	225.381	266.415	185.607	0	0	685	11.4167
700	1.5	11.4333		0.265	1.5	0.274	1.5	0.212	0	0	0	0	0.3975	0.411	0.318	0	0	225.778	266.826	185.925	0	0	686	11.4333
701	1.5	11.45		0.265	1.5	0.274	1.5	0.212	0	0	0	0	0.3975	0.411	0.318	0	0	226.176	267.237	186.243	0	0	687	11.45
702	1.5	11.4667		0.265	1.5	0.273	1.5	0.212	0	0	0	0	0.3975	0.4095	0.318	0	0	226.573	267.647	186.561	0	0	688	11.4667
703	1.5	11.4833		0.265	1.5	0.273	1.5	0.212	0	0	0	0	0.3975	0.4095	0.318	0	0	226.971	268.056	186.879	0	0	689	11.4833
704	1.5	11.5		0.264	1.5	0.273	1.5	0.212	0	0	0	0	0.396	0.4095	0.318	0	0	227.367	268.466	187.197	0	0	690	11.5
705	1.5	11.5167		0.264	1.5	0.273	1.5	0.212	0	0	0	0	0.396	0.4095	0.318	0	0	227.763	268.875	187.515	0	0	691	11.5167
706	1.5	11.5333		0.264	1.5	0.273	1.5	0.212	0	0	0	0	0.396	0.4095	0.318	0	0	228.159	269.285	187.833	0	0	692	11.5333
707	1.5	11.55		0.264	1.5	0.273	1.5	0.212	0	0	0	0	0.396	0.4095	0.318	0	0	228.555	269.694	188.151	0	0	693	11.55
708	1.5	11.5667		0.264	1.5	0.273	1.5	0.212	0	0	0	0	0.396	0.4095	0.318	0	0	228.951	270.104	188.469	0	0	694	11.5667
709	1.5	11.5833		0.264	1.5	0.272	1.5	0.219	0	0	0	0	0.396	0.408	0.3285	0	0	229.347	270.512	188.798	0	0	695	11.5833
710	1.5	11.6		0.264	1.5	0.273	1.5	0.22	0	0	0	0	0.396	0.4095	0.33	0	0	229.743	270.921	189.128	0	0	696	11.6
711	1.5	11.6167		0.264	1.5	0.272	1.5	0.218	0	0	0	0	0.396	0.408	0.327	0	0	230.139	271.329	189.455	0	0	697	11.6167
712	1.5	11.6333		0.264	1.92	0.289	1.5	0.219	0	0	0	0	0.396	0.55488	0.3285	0	0	230.535	271.884	189.783	0	0	698	11.6333
713	1.5	11.65		0.264	1.5	0.289	1.5	0.219	0	0	0	0	0.396	0.4335	0.3285	0	0	230.931	272.318	190.112	0	0	699	11.65
714	1.5	11.6667		0.264	1.5	0.287	1.5	0.219	0	0	0	0	0.396	0.4305	0.3285	0	0	231.327	272.748	190.44	0	0	700	11.6667
715	1.5	11.6833		0.285	1.5	0.284	1.5	0.219	0	0	0	0	0.4275	0.426	0.3285	0	0	231.754	273.174	190.769	0	0	701	11.6833
716	1.5	11.7		0.282	1.5	0.282	1.5	0.22	0	0	0	0	0.423	0.423	0.33	0	0	232.177	273.597	191.099	0	0	702	11.7
717	1.5	11.7167		0.28	1.5	0.28	1.5	0.22	0	0	0	0	0.42	0.42	0.33	0	0	232.597	274.017	191.429	0	0	703	11.7167
718	1.5	11.7333		0.277	1.5	0.279	1.5	0.22	0	0	0	0	0.4155	0.4185	0.33	0	0	233.013	274.436	191.759	0	0	704	11.7333
719	1.5	11.75		0.275	1.5	0.277	1.5	0.22	0	0	0	0	0.4125	0.4155	0.33	0	0	233.425	274.851	192.089	0	0	705	11.75
720	1.5	11.7667		0.273	1.5	0.275	1.5	0.22	0	0	0	0	0.4095	0.4125	0.33	0	0	233.835	275.264	192.419	0	0	706	11.7667
721	1.5	11.7833		0.272	1.5	0.274	1.5	0.22	0	0	0	0	0.408	0.411	0.33	0	0	234.243	275.675	192.749	0	0	707	11.7833
722	1.5	11.8		0.27	1.5	0.274	1.5	0.218	0	0	0	0	0.405	0.411	0.327	0	0	234.648	276.086	193.076	0	0	708	11.8
723	1.5	11.8167		0.269	1.5	0.273	1.5	0.217	0	0	0	0	0.4035	0.4095	0.3255	0	0	235.051	276.495	193.401	0	0	709	11.8167
724	1.5	11.8333		0.268	1.5	0.273	1.5	0.217	0	0	0	0	0.402	0.4095	0.3255	0	0	235.453	276.905	193.727	0	0	710	11.8333
725	1.5	11.85		0.268	1.5	0.272	1.5	0.218	0	0	0	0	0.402	0.408	0.327	0	0	235.855	277.313	194.054	0	0	711	11.85
726	1.5	11.8667		0.267	1.5	0.271	1.5	0.218	0	0	0	0	0.4005	0.4065	0.327	0	0	236.256	277.719	194.381	0	0	712	11.8667
727	1.5	11.8833		0.267	1.5	0.271	1.5	0.218	0	0	0	0	0.4005	0.4065	0.327	0	0	236.656	278.126	194.708	0	0	713	11.8833
728	1.5	11.9		0.266	1.5	0.271	1.5	0.217	0	0	0	0	0.399	0.4065	0.3255	0	0	237.055	278.532	195.033	0	0	714	11.9
729	1.5	11.9167		0.266	1.5	0.271	1.5	0.217	0	0	0	0	0.399	0.4065	0.3255	0	0	237.454	278.939	195.359	0	0	715	11.9167
730	1.5	11.9333		0.266	1.5	0.271	1.5	0.217	0	0	0	0	0.399	0.4065	0.3255	0	0	237.853	279.345	195.684	0	0	716	11.9333
731	1.5	11.95		0.265	1.5	0.271	1.5	0.216	0	0	0	0	0.3975	0.4065	0.324	0	0	238.251	279.752	196.008	0	0	717	11.95
732	1.5	11.9667		0.265	1.5	0.271	1.5	0.216	0	0	0	0	0.3975	0.4065	0.324	0	0	238.648	280.158	196.332	0	0	718	11.9667
733	1.5	11.9833		0.265	1.5	0.271	1.5	0.216	0	0	0	0	0.3975	0.4065	0.324	0	0	239.046	280.565	196.656	0	0	719	11.9833
734	1.5	12		0.265	1.5	0.27	1.5	0.215	0	0	0	0	0.3975	0.405	0.3225	0	0	239.443	280.97	196.979	0	0	720	12
735	1.5	12.0167		0.265	1.5	0.27	1.5	0.215	0	0	0	0	0.3975	0.405	0.3225	0	0	239.841	281.375	197.301	0	0	721	12.0167
736	1.5	12.0333		0.265	1.5	0.27	1.5	0.215	0	0	0	0	0.3975	0.405	0.3225	0	0	240.238	281.78	197.624	0	0	722	12.0333
737	1.5	12.05		0.265	1.5	0.27	1.5	0.215	0	0	0	0	0.3975	0.405	0.3225	0	0	240.636	282.185	197.946	0	0	723	12.05
738	1.5	12.0667		0.265	1.5	0.271	1.5	0.215	0	0	0	0	0.3975	0.4065	0.3225	0	0	241.033	282.591	198.269	0	0	724	12.0667
739	1.5	12.0833		0.265	1.5	0.272	1.5	0.222	0	0	0	0	0.3975	0.408	0.333	0	0	241.431	282.999	198.602	0	0	725	12.0833
740	1.5	12.1		0.265	1.5	0.273	1.5	0.229	0	0	0	0	0.3975	0.4095	0.3435	0	0	241.828	283.409	198.945	0	0	726	12.1
741	1.5	12.1167		0.265	1.5	0.273	1.5	0.227	0	0	0	0	0.3975	0.4095	0.3405	0	0	242.226	283.818	199.286	0	0	727	12.1167
742	1.5	12.1333		0.265	2.44	0.527	1.5	0.226	0	0	0	0	0.3975	1.28588	0.339	0	0	242.623	285.104	199.625	0	0	728	12.1333
743	1.5	12.15		0.265	1.5	0.298	1.5	0.226	0	0	0	0	0.3975	0.447	0.339	0	0	243.021	285.551	199.964	0	0	729	12.15
744	1.5	12.1667		0.265	1.5	0.296	1.5	0.225	0	0	0	0	0.3975	0.444	0.3375	0	0	243.418	285.995	200.301	0	0	730	12.1667
745	1.5	12.1833		0.285	1.5	0.293	1.5	0.224	0	0	0	0	0.4275	0.4395	0.336	0	0	243.846	286.434	200.637	0	0	731	12.1833
746	1.5	12.2		0.284	1.5	0.29	1.5	0.224	0	0	0	0	0.426	0.435	0.336	0	0	244.272	286.869	200.973	0	0	732	12.2
747	1.5	12.2167		0.281	1.5	0.288	1.5	0.224	0	0	0	0	0.4215	0.432	0.336	0	0	244.693	287.301	201.309	0	0	733	12.2167
748	1.5	12.2333		0.279	1.5	0.287	1.5	0.224	0	0	0	0	0.4185	0.4305	0.336	0	0	245.112	287.732	201.645	0	0	734	12.2333
749	1.5	12.25		0.277	1.5	0.285	1.5	0.224	0	0	0	0	0.4155	0.4275	0.336	0	0	245.527	288.159	201.981	0	0	735	12.25
750	1.5	12.2667		0.275	1.5	0.284	1.5	0.224	0	0	0	0	0.4125	0.426	0.336	0	0	245.94	288.585	202.317	0	0	736	12.2667
751	1.5	12.2833		0.274	1.5	0.283	1.5	0.224	0	0	0	0	0.411	0.4245	0.336	0	0	246.351	289.01	202.653	0	0	737	12.2833
752	1.5	12.3		0.273	1.5	0.282	1.5	0.224	0	0	0	0	0.4095	0.423	0.336	0	0	246.76	289.433	202.989	0	0	738	12.3
753	1.5	12.3167		0.272	1.5	0.282	1.5	0.224	0	0	0	0	0.408	0.423	0.336	0	0	247.168	289.856	203.325	0	0	739	12.3167
754	1.5	12.3333		0.271	1.5	0.281	1.5	0.224	0	0	0	0	0.4065	0.4215	0.336	0	0	247.575	290.277	203.661	0	0	740	12.3333
755	1.5	12.35		0.27	1.5	0.281	1.5	0.224	0	0	0	0	0.405	0.4215	0.336	0	0	247.98	290.699	203.997	0	0	741	12.35
756	1.5	12.3667		0.27	1.5	0.281	1.5	0.224	0	0	0	0	0.405	0.4215	0.336	0	0	248.385	291.12	204.333	0	0	742	12.3667
757	1.5	12.3833		0.269	1.5	0.28	1.5	0.224	0	0	0	0	0.4035	0.42	0.336	0	0	248.788	291.54	204.669	0	0	743	12.3833
758	1.5	12.4		0.269	1.5	0.28	1.5	0.224	0	0	0	0	0.4035	0.42	0.336	0	0	249.192	291.96	205.005	0	0	744	12.4
759	1.5	12.4167		0.269	1.5	0.279	1.5	0.225	0	0	0	0	0.4035	0.4185	0.3375	0	0	249.595	292.379	205.343	0	0	745	12.4167
760	1.5	12.4333		0.268	1.5	0.279	1.5	0.225	0	0	0	0	0.402	0.4185	0.3375	0	0	249.997	292.797	205.68	0	0	746	12.4333
761	1.5	12.45		0.268	1.5	0.279	1.5	0.225	0	0	0	0	0.402	0.4185	0.3375	0	0	250.399	293.216	206.018	0	0	747	12.45
762	1.5	12.4667		0.268	1.5	0.279	1.5	0.224	0	0	0	0	0.402	0.4185	0.336	0	0	250.801	293.634	206.354	0	0	748	12.4667
763	1.5	12.4833		0.268	1.5	0.279	1.5	0.225	0	0	0	0	0.402	0.4185	0.3375	0	0	251.203	294.053	206.691	0	0	749	12.4833
764	1.5	12.5		0.268	1.5	0.278	1.5	0.225	0	0	0	0	0.402	0.417	0.3375	0	0	251.605	294.47	207.029	0	0	750	12.5
765	1.5	12.5167		0.268	1.5	0.278	1.5	0.225	0	0	0	0	0.402	0.417	0.3375	0	0	252.007	294.887	207.366	0	0	751	12.5167
766	1.5	12.5333		0.268	1.5	0.278	1.5	0.225	0	0	0	0	0.402	0.417	0.3375	0	0	252.409	295.304	207.704	0	0	752	12.5333
767	1.5	12.55		0.268	1.5	0.278	1.5	0.225	0	0	0	0	0.402	0.417	0.3375	0	0	252.811	295.721	208.041	0	0	753	12.55
768	1.5	12.5667		0.267	1.5	0.277	1.5	0.225	0	0	0	0	0.4005	0.4155	0.3375	0	0	253.212	296.136	208.379	0	0	754	12.5667
769	1.5	12.5833		0.267	1.5	0.277	1.5	0.235	0	0	0	0	0.4005	0.4155	0.3525	0	0	253.612	296.552	208.731	0	0	755	12.5833
770	1.5	12.6		0.267	1.5	0.277	1.5	0.228	0	0	0	0	0.4005	0.4155	0.342	0	0	254.013	296.967	209.073	0	0	756	12.6
771	1.5	12.6167		0.267	1.5	0.276	1.5	0.226	0	0	0	0	0.4005	0.414	0.339	0	0	254.413	297.381	209.412	0	0	757	12.6167
772	1.5	12.6333		0.267	2.21	0.295	1.5	0.224	0	0	0	0	0.4005	0.65195	0.336	0	0	254.814	298.033	209.748	0	0	758	12.6333
773	1.5	12.65		0.267	1.5	0.296	1.5	0.224	0	0	0	0	0.4005	0.444	0.336	0	0	255.214	298.477	210.084	0	0	759	12.65
774	1.5	12.6667		0.267	1.5	0.293	1.5	0.223	0	0	0	0	0.4005	0.4395	0.3345	0	0	255.615	298.917	210.419	0	0	760	12.6667
775	1.5	12.6833		0.286	1.5	0.291	1.5	0.223	0	0	0	0	0.429	0.4365	0.3345	0	0	256.044	299.353	210.753	0	0	761	12.6833
776	1.5	12.7		0.285	1.5	0.288	1.5	0.222	0	0	0	0	0.4275	0.432	0.333	0	0	256.471	299.785	211.086	0	0	762	12.7
777	1.5	12.7167		0.282	1.5	0.286	1.5	0.222	0	0	0	0	0.423	0.429	0.333	0	0	256.894	300.214	211.419	0	0	763	12.7167
778	1.5	12.7333		0.28	1.5	0.283	1.5	0.222	0	0	0	0	0.42	0.4245	0.333	0	0	257.314	300.639	211.752	0	0	764	12.7333
779	1.5	12.75		0.278	1.5	0.282	1.5	0.222	0	0	0	0	0.417	0.423	0.333	0	0	257.731	301.062	212.085	0	0	765	12.75
780	1.5	12.7667		0.276	1.5	0.281	1.5	0.222	0	0	0	0	0.414	0.4215	0.333	0	0	258.145	301.483	212.418	0	0	766	12.7667
781	1.5	12.7833		0.275	1.5	0.28	1.5	0.222	0	0	0	0	0.4125	0.42	0.333	0	0	258.558	301.903	212.751	0	0	767	12.7833
782	1.5	12.8		0.273	1.5	0.279	1.5	0.222	0	0	0	0	0.4095	0.4185	0.333	0	0	258.967	302.322	213.084	0	0	768	12.8
783	1.5	12.8167		0.273	1.5	0.278	1.5	0.222	0	0	0	0	0.4095	0.417	0.333	0	0	259.377	302.739	213.417	0	0	769	12.8167
784	1.5	12.8333		0.272	1.5	0.277	1.5	0.222	0	0	0	0	0.408	0.4155	0.333	0	0	259.785	303.154	213.75	0	0	770	12.8333
785	1.5	12.85		0.271	1.5	0.277	1.5	0.222	0	0	0	0	0.4065	0.4155	0.333	0	0	260.191	303.57	214.083	0	0	771	12.85
786	1.5	12.8667		0.27	1.5	0.276	1.5	0.221	0	0	0	0	0.405	0.414	0.3315	0	0	260.596	303.984	214.415	0	0	772	12.8667
787	1.5	12.8833		0.27	1.5	0.276	1.5	0.221	0	0	0	0	0.405	0.414	0.3315	0	0	261.001	304.398	214.746	0	0	773	12.8833
788	1.5	12.9		0.269	1.5	0.275	1.5	0.221	0	0	0	0	0.4035	0.4125	0.3315	0	0	261.405	304.81	215.078	0	0	774	12.9
789	1.5	12.9167		0.269	1.5	0.275	1.5	0.221	0	0	0	0	0.4035	0.4125	0.3315	0	0	261.808	305.223	215.409	0	0	775	12.9167
790	1.5	12.9333		0.269	1.5	0.274	1.5	0.221	0	0	0	0	0.4035	0.411	0.3315	0	0	262.212	305.634	215.741	0	0	776	12.9333
791	1.5	12.95		0.269	1.5	0.274	1.5	0.221	0	0	0	0	0.4035	0.411	0.3315	0	0	262.615	306.045	216.072	0	0	777	12.95
792	1.5	12.9667		0.268	1.5	0.273	1.5	0.222	0	0	0	0	0.402	0.4095	0.333	0	0	263.017	306.454	216.405	0	0	778	12.9667
793	1.5	12.9833		0.268	1.5	0.273	1.5	0.222	0	0	0	0	0.402	0.4095	0.333	0	0	263.419	306.864	216.738	0	0	779	12.9833
794	1.5	13		0.268	1.5	0.272	1.5	0.222	0	0	0	0	0.402	0.408	0.333	0	0	263.821	307.272	217.071	0	0	780	13
795	1.5	13.0167		0.268	1.5	0.272	1.5	0.222	0	0	0	0	0.402	0.408	0.333	0	0	264.223	307.68	217.404	0	0	781	13.0167
796	1.5	13.0333		0.268	1.5	0.271	1.5	0.222	0	0	0	0	0.402	0.4065	0.333	0	0	264.625	308.086	217.737	0	0	782	13.0333
797	1.5	13.05		0.268	1.5	0.271	1.5	0.222	0	0	0	0	0.402	0.4065	0.333	0	0	265.027	308.493	218.07	0	0	783	13.05
798	1.5	13.0667		0.268	1.5	0.27	1.5	0.222	0	0	0	0	0.402	0.405	0.333	0	0	265.429	308.898	218.403	0	0	784	13.0667
799	1.5	13.0833		0.268	1.5	0.27	1.5	0.241	0	0	0	0	0.402	0.405	0.3615	0	0	265.831	309.303	218.765	0	0	785	13.0833
800	1.5	13.1		0.268	1.5	0.27	1.5	0.243	0	0	0	0	0.402	0.405	0.3645	0	0	266.233	309.708	219.129	0	0	786	13.1
801	1.5	13.1167		0.268	1.5	0.269	1.5	0.24	0	0	0	0	0.402	0.4035	0.36	0	0	266.635	310.111	219.489	0	0	787	13.1167
802	1.5	13.1333		0.268	2.15	0.622	1.5	0.239	0	0	0	0	0.402	1.3373	0.3585	0	0	267.037	311.449	219.848	0	0	788	13.1333
803	1.5	13.15		0.267	1.5	0.287	1.5	0.237	0	0	0	0	0.4005	0.4305	0.3555	0	0	267.438	311.879	220.203	0	0	789	13.15
804	1.5	13.1667		0.268	1.5	0.286	1.5	0.236	0	0	0	0	0.402	0.429	0.354	0	0	267.84	312.308	220.557	0	0	790	13.1667
805	1.5	13.1833		0.286	1.5	0.282	1.5	0.236	0	0	0	0	0.429	0.423	0.354	0	0	268.269	312.731	220.911	0	0	791	13.1833
806	1.5	13.2		0.285	1.5	0.28	1.5	0.235	0	0	0	0	0.4275	0.42	0.3525	0	0	268.696	313.151	221.264	0	0	792	13.2
807	1.5	13.2167		0.282	1.5	0.276	1.5	0.235	0	0	0	0	0.423	0.414	0.3525	0	0	269.119	313.565	221.616	0	0	793	13.2167
808	1.5	13.2333		0.28	1.5	0.274	1.5	0.227	0	0	0	0	0.42	0.411	0.3405	0	0	269.539	313.976	221.957	0	0	794	13.2333
809	1.5	13.25		0.278	1.5	0.273	1.5	0.226	0	0	0	0	0.417	0.4095	0.339	0	0	269.956	314.386	222.296	0	0	795	13.25
810	1.5	13.2667		0.276	1.5	0.272	1.5	0.226	0	0	0	0	0.414	0.408	0.339	0	0	270.37	314.794	222.635	0	0	796	13.2667
811	1.5	13.2833		0.275	1.5	0.27	1.5	0.225	0	0	0	0	0.4125	0.405	0.3375	0	0	270.783	315.199	222.972	0	0	797	13.2833
812	1.5	13.3		0.274	1.5	0.269	1.5	0.225	0	0	0	0	0.411	0.4035	0.3375	0	0	271.194	315.602	223.31	0	0	798	13.3
813	1.5	13.3167		0.273	1.5	0.269	1.5	0.226	0	0	0	0	0.4095	0.4035	0.339	0	0	271.603	316.006	223.649	0	0	799	13.3167
814	1.5	13.3333		0.272	1.5	0.268	1.5	0.226	0	0	0	0	0.408	0.402	0.339	0	0	272.011	316.408	223.988	0	0	800	13.3333
815	1.5	13.35		0.272	1.5	0.268	1.5	0.225	0	0	0	0	0.408	0.402	0.3375	0	0	272.419	316.81	224.325	0	0	801	13.35
816	1.5	13.3667		0.271	1.5	0.267	1.5	0.225	0	0	0	0	0.4065	0.4005	0.3375	0	0	272.826	317.21	224.663	0	0	802	13.3667
817	1.5	13.3833		0.27	1.5	0.267	1.5	0.225	0	0	0	0	0.405	0.4005	0.3375	0	0	273.231	317.611	225	0	0	803	13.3833
818	1.5	13.4		0.27	1.5	0.267	1.5	0.225	0	0	0	0	0.405	0.4005	0.3375	0	0	273.636	318.011	225.338	0	0	804	13.4
819	1.5	13.4167		0.27	1.5	0.267	1.5	0.225	0	0	0	0	0.405	0.4005	0.3375	0	0	274.041	318.412	225.675	0	0	805	13.4167
820	1.5	13.4333		0.27	1.5	0.267	1.5	0.225	0	0	0	0	0.405	0.4005	0.3375	0	0	274.446	318.812	226.013	0	0	806	13.4333
821	1.5	13.45		0.27	1.5	0.267	1.5	0.225	0	0	0	0	0.405	0.4005	0.3375	0	0	274.851	319.213	226.35	0	0	807	13.45
822	1.5	13.4667		0.269	1.5	0.267	1.5	0.225	0	0	0	0	0.4035	0.4005	0.3375	0	0	275.254	319.613	226.688	0	0	808	13.4667
823	1.5	13.4833		0.269	1.5	0.267	1.5	0.225	0	0	0	0	0.4035	0.4005	0.3375	0	0	275.658	320.014	227.025	0	0	809	13.4833
824	1.5	13.5		0.269	1.5	0.267	1.5	0.225	0	0	0	0	0.4035	0.4005	0.3375	0	0	276.061	320.414	227.363	0	0	810	13.5
825	1.5	13.5167		0.269	1.5	0.267	1.5	0.226	0	0	0	0	0.4035	0.4005	0.339	0	0	276.465	320.815	227.702	0	0	811	13.5167
826	1.5	13.5333		0.269	1.5	0.267	1.5	0.225	0	0	0	0	0.4035	0.4005	0.3375	0	0	276.868	321.215	228.039	0	0	812	13.5333
827	1.5	13.55		0.269	1.5	0.267	1.5	0.225	0	0	0	0	0.4035	0.4005	0.3375	0	0	277.272	321.616	228.377	0	0	813	13.55
828	1.5	13.5667		0.269	1.5	0.267	1.5	0.225	0	0	0	0	0.4035	0.4005	0.3375	0	0	277.675	322.016	228.714	0	0	814	13.5667
829	1.5	13.5833		0.268	1.5	0.267	1.5	0.25	0	0	0	0	0.402	0.4005	0.375	0	0	278.077	322.417	229.089	0	0	815	13.5833
830	1.5	13.6		0.268	1.5	0.267	1.5	0.238	0	0	0	0	0.402	0.4005	0.357	0	0	278.479	322.817	229.446	0	0	816	13.6
831	1.5	13.6167		0.268	1.5	0.267	1.5	0.235	0	0	0	0	0.402	0.4005	0.3525	0	0	278.881	323.218	229.799	0	0	817	13.6167
832	1.5	13.6333		0.268	1.5	0.416	1.5	0.234	0	0	0	0	0.402	0.624	0.351	0	0	279.283	323.842	230.15	0	0	818	13.6333
833	1.5	13.65		0.268	1.5	0.289	1.5	0.233	0	0	0	0	0.402	0.4335	0.3495	0	0	279.685	324.275	230.499	0	0	819	13.65
834	1.5	13.6667		0.268	1.5	0.287	1.5	0.231	0	0	0	0	0.402	0.4305	0.3465	0	0	280.087	324.706	230.846	0	0	820	13.6667
835	1.5	13.6833		0.287	1.5	0.284	1.5	0.231	0	0	0	0	0.4305	0.426	0.3465	0	0	280.518	325.132	231.192	0	0	821	13.6833
836	1.5	13.7		0.285	1.5	0.282	1.5	0.231	0	0	0	0	0.4275	0.423	0.3465	0	0	280.945	325.555	231.539	0	0	822	13.7
837	1.5	13.7167		0.282	1.5	0.28	1.5	0.231	0	0	0	0	0.423	0.42	0.3465	0	0	281.368	325.975	231.885	0	0	823	13.7167
838	1.5	13.7333		0.28	1.5	0.279	1.5	0.23	0	0	0	0	0.42	0.4185	0.345	0	0	281.788	326.393	232.23	0	0	824	13.7333
839	1.5	13.75		0.278	1.5	0.278	1.5	0.23	0	0	0	0	0.417	0.417	0.345	0	0	282.205	326.81	232.575	0	0	825	13.75
840	1.5	13.7667		0.277	1.5	0.277	1.5	0.226	0	0	0	0	0.4155	0.4155	0.339	0	0	282.621	327.226	232.914	0	0	826	13.7667
841	1.5	13.7833		0.276	1.5	0.276	1.5	0.225	0	0	0	0	0.414	0.414	0.3375	0	0	283.035	327.64	233.252	0	0	827	13.7833
842	1.5	13.8		0.274	1.5	0.276	1.5	0.225	0	0	0	0	0.411	0.414	0.3375	0	0	283.446	328.054	233.589	0	0	828	13.8
843	1.5	13.8167		0.274	1.5	0.275	1.5	0.225	0	0	0	0	0.411	0.4125	0.3375	0	0	283.857	328.466	233.927	0	0	829	13.8167
844	1.5	13.8333		0.273	1.5	0.275	1.5	0.225	0	0	0	0	0.4095	0.4125	0.3375	0	0	284.266	328.879	234.264	0	0	830	13.8333
845	1.5	13.85		0.272	1.5	0.275	1.5	0.225	0	0	0	0	0.408	0.4125	0.3375	0	0	284.674	329.291	234.602	0	0	831	13.85
846	1.5	13.8667		0.271	1.5	0.275	1.5	0.225	0	0	0	0	0.4065	0.4125	0.3375	0	0	285.081	329.704	234.939	0	0	832	13.8667
847	1.5	13.8833		0.271	1.5	0.275	1.5	0.225	0	0	0	0	0.4065	0.4125	0.3375	0	0	285.487	330.116	235.277	0	0	833	13.8833
848	1.5	13.9		0.271	1.5	0.274	1.5	0.225	0	0	0	0	0.4065	0.411	0.3375	0	0	285.894	330.527	235.614	0	0	834	13.9
849	1.5	13.9167		0.27	1.5	0.274	1.5	0.225	0	0	0	0	0.405	0.411	0.3375	0	0	286.299	330.938	235.952	0	0	835	13.9167
850	1.5	13.9333		0.27	1.5	0.273	1.5	0.225	0	0	0	0	0.405	0.4095	0.3375	0	0	286.704	331.348	236.289	0	0	836	13.9333
851	1.5	13.95		0.27	1.5	0.273	1.5	0.225	0	0	0	0	0.405	0.4095	0.3375	0	0	287.109	331.757	236.627	0	0	837	13.95
852	1.5	13.9667		0.27	1.5	0.273	1.5	0.225	0	0	0	0	0.405	0.4095	0.3375	0	0	287.514	332.167	236.964	0	0	838	13.9667
853	1.5	13.9833		0.27	1.5	0.273	1.5	0.225	0	0	0	0	0.405	0.4095	0.3375	0	0	287.919	332.576	237.302	0	0	839	13.9833
854	1.5	14		0.269	1.5	0.272	1.5	0.225	0	0	0	0	0.4035	0.408	0.3375	0	0	288.322	332.984	237.639	0	0	840	14
855	1.5	14.0167		0.269	1.5	0.272	1.5	0.225	0	0	0	0	0.4035	0.408	0.3375	0	0	288.726	333.392	237.977	0	0	841	14.0167
856	1.5	14.0333		0.269	1.5	0.272	1.5	0.225	0	0	0	0	0.4035	0.408	0.3375	0	0	289.129	333.8	238.314	0	0	842	14.0333
857	1.5	14.05		0.269	1.5	0.272	1.5	0.225	0	0	0	0	0.4035	0.408	0.3375	0	0	289.533	334.208	238.652	0	0	843	14.05
858	1.5	14.0667		0.269	1.5	0.271	1.5	0.225	0	0	0	0	0.4035	0.4065	0.3375	0	0	289.936	334.615	238.989	0	0	844	14.0667
859	1.5	14.0833		0.269	1.5	0.271	1.5	0.192	0	0	0	0	0.4035	0.4065	0.288	0	0	290.34	335.021	239.277	0	0	845	14.0833
860	1.5	14.1		0.269	1.5	0.27	1.5	0.223	0	0	0	0	0.4035	0.405	0.3345	0	0	290.743	335.426	239.612	0	0	846	14.1
861	1.5	14.1167		0.269	1.5	0.269	1.5	0.227	0	0	0	0	0.4035	0.4035	0.3405	0	0	291.147	335.83	239.952	0	0	847	14.1167
862	1.5	14.1333		0.269	1.85	0.719	1.5	0.228	0	0	0	0	0.4035	1.33015	0.342	0	0	291.55	337.16	240.294	0	0	848	14.1333
863	1.5	14.15		0.269	1.5	0.287	1.5	0.228	0	0	0	0	0.4035	0.4305	0.342	0	0	291.954	337.59	240.636	0	0	849	14.15
864	1.5	14.1667		0.269	1.5	0.285	1.5	0.229	0	0	0	0	0.4035	0.4275	0.3435	0	0	292.357	338.018	240.98	0	0	850	14.1667
865	1.5	14.1833		0.286	1.5	0.282	1.5	0.229	0	0	0	0	0.429	0.423	0.3435	0	0	292.786	338.441	241.323	0	0	851	14.1833
866	1.5	14.2		0.285	1.5	0.28	1.5	0.229	0	0	0	0	0.4275	0.42	0.3435	0	0	293.214	338.861	241.667	0	0	852	14.2
867	1.5	14.2167		0.282	1.5	0.278	1.5	0.229	0	0	0	0	0.423	0.417	0.3435	0	0	293.637	339.278	242.01	0	0	853	14.2167
868	1.5	14.2333		0.28	1.5	0.277	1.5	0.229	0	0	0	0	0.42	0.4155	0.3435	0	0	294.057	339.693	242.354	0	0	854	14.2333
869	1.5	14.25		0.279	1.5	0.276	1.5	0.229	0	0	0	0	0.4185	0.414	0.3435	0	0	294.475	340.107	242.697	0	0	855	14.25
870	1.5	14.2667		0.276	1.5	0.275	1.5	0.23	0	0	0	0	0.414	0.4125	0.345	0	0	294.889	340.52	243.042	0	0	856	14.2667
871	1.5	14.2833		0.275	1.5	0.275	1.5	0.23	0	0	0	0	0.4125	0.4125	0.345	0	0	295.302	340.932	243.387	0	0	857	14.2833
872	1.5	14.3		0.274	1.5	0.274	1.5	0.23	0	0	0	0	0.411	0.411	0.345	0	0	295.713	341.343	243.732	0	0	858	14.3
873	1.5	14.3167		0.274	1.5	0.274	1.5	0.23	0	0	0	0	0.411	0.411	0.345	0	0	296.124	341.754	244.077	0	0	859	14.3167
874	1.5	14.3333		0.273	1.5	0.274	1.5	0.23	0	0	0	0	0.4095	0.411	0.345	0	0	296.533	342.165	244.422	0	0	860	14.3333
875	1.5	14.35		0.273	1.5	0.274	1.5	0.23	0	0	0	0	0.4095	0.411	0.345	0	0	296.943	342.576	244.767	0	0	861	14.35
876	1.5	14.3667		0.272	1.5	0.273	1.5	0.23	0	0	0	0	0.408	0.4095	0.345	0	0	297.351	342.986	245.112	0	0	862	14.3667
877	1.5	14.3833		0.271	1.5	0.274	1.5	0.23	0	0	0	0	0.4065	0.411	0.345	0	0	297.757	343.397	245.457	0	0	863	14.3833
878	1.5	14.4		0.271	1.5	0.275	1.5	0.23	0	0	0	0	0.4065	0.4125	0.345	0	0	298.164	343.809	245.802	0	0	864	14.4
879	1.5	14.4167		0.271	1.5	0.275	1.5	0.23	0	0	0	0	0.4065	0.4125	0.345	0	0	298.57	344.222	246.147	0	0	865	14.4167
880	1.5	14.4333		0.271	1.5	0.275	1.5	0.23	0	0	0	0	0.4065	0.4125	0.345	0	0	298.977	344.634	246.492	0	0	866	14.4333
881	1.5	14.45		0.271	1.5	0.275	1.5	0.23	0	0	0	0	0.4065	0.4125	0.345	0	0	299.383	345.047	246.837	0	0	867	14.45
882	1.5	14.4667		0.27	1.5	0.275	1.5	0.231	0	0	0	0	0.405	0.4125	0.3465	0	0	299.788	345.459	247.184	0	0	868	14.4667
883	1.5	14.4833		0.27	1.5	0.275	1.5	0.231	0	0	0	0	0.405	0.4125	0.3465	0	0	300.193	345.872	247.53	0	0	869	14.4833
884	1.5	14.5		0.27	1.5	0.275	1.5	0.231	0	0	0	0	0.405	0.4125	0.3465	0	0	300.598	346.284	247.877	0	0	870	14.5
885	1.5	14.5167		0.27	1.5	0.275	1.5	0.231	0	0	0	0	0.405	0.4125	0.3465	0	0	301.003	346.697	248.223	0	0	871	14.5167
886	1.5	14.5333		0.27	1.5	0.274	1.5	0.231	0	0	0	0	0.405	0.411	0.3465	0	0	301.408	347.108	248.57	0	0	872	14.5333
887	1.5	14.55		0.27	1.5	0.274	1.5	0.231	0	0	0	0	0.405	0.411	0.3465	0	0	301.813	347.519	248.916	0	0	873	14.55
888	1.5	14.5667		0.27	1.5	0.274	1.5	0.231	0	0	0	0	0.405	0.411	0.3465	0	0	302.218	347.93	249.263	0	0	874	14.5667
889	1.5	14.5833		0.27	1.5	0.274	1.5	0.228	0	0	0	0	0.405	0.411	0.342	0	0	302.623	348.341	249.605	0	0	875	14.5833
890	1.5	14.6		0.27	1.5	0.274	1.5	0.223	0	0	0	0	0.405	0.411	0.3345	0	0	303.028	348.752	249.939	0	0	876	14.6
891	1.5	14.6167		0.27	1.5	0.274	1.5	0.22	0	0	0	0	0.405	0.411	0.33	0	0	303.433	349.163	250.269	0	0	877	14.6167
892	1.5	14.6333		0.27	2.79	0.305	1.5	0.218	0	0	0	0	0.405	0.85095	0.327	0	0	303.838	350.014	250.596	0	0	878	14.6333
893	1.5	14.65		0.27	1.5	0.3	1.5	0.217	0	0	0	0	0.405	0.45	0.3255	0	0	304.243	350.464	250.922	0	0	879	14.65
894	1.5	14.6667		0.27	1.5	0.298	1.5	0.216	0	0	0	0	0.405	0.447	0.324	0	0	304.648	350.911	251.246	0	0	880	14.6667
895	1.5	14.6833		0.287	1.5	0.296	1.5	0.216	0	0	0	0	0.4305	0.444	0.324	0	0	305.079	351.355	251.57	0	0	881	14.6833
896	1.5	14.7		0.286	1.5	0.294	1.5	0.215	0	0	0	0	0.429	0.441	0.3225	0	0	305.508	351.796	251.892	0	0	882	14.7
897	1.5	14.7167		0.283	1.5	0.292	1.5	0.213	0	0	0	0	0.4245	0.438	0.3195	0	0	305.932	352.234	252.212	0	0	883	14.7167
898	1.5	14.7333		0.281	1.5	0.29	1.5	0.212	0	0	0	0	0.4215	0.435	0.318	0	0	306.354	352.669	252.53	0	0	884	14.7333
899	1.5	14.75		0.28	1.5	0.289	1.5	0.211	0	0	0	0	0.42	0.4335	0.3165	0	0	306.774	353.102	252.846	0	0	885	14.75
900	1.5	14.7667		0.278	1.5	0.288	1.5	0.211	0	0	0	0	0.417	0.432	0.3165	0	0	307.191	353.534	253.163	0	0	886	14.7667
901	1.5	14.7833		0.277	1.5	0.287	1.5	0.204	0	0	0	0	0.4155	0.4305	0.306	0	0	307.606	353.965	253.469	0	0	887	14.7833
902	1.5	14.8		0.276	1.5	0.287	1.5	0.203	0	0	0	0	0.414	0.4305	0.3045	0	0	308.02	354.395	253.773	0	0	888	14.8
903	1.5	14.8167		0.275	1.5	0.286	1.5	0.2	0	0	0	0	0.4125	0.429	0.3	0	0	308.433	354.824	254.073	0	0	889	14.8167
904	1.5	14.8333		0.274	1.5	0.285	1.5	0.2	0	0	0	0	0.411	0.4275	0.3	0	0	308.844	355.252	254.373	0	0	890	14.8333
905	1.5	14.85		0.273	1.5	0.285	1.5	0.198	0	0	0	0	0.4095	0.4275	0.297	0	0	309.253	355.679	254.67	0	0	891	14.85
906	1.5	14.8667		0.273	1.5	0.284	1.5	0.198	0	0	0	0	0.4095	0.426	0.297	0	0	309.663	356.105	254.967	0	0	892	14.8667
907	1.5	14.8833		0.272	1.5	0.284	1.5	0.198	0	0	0	0	0.408	0.426	0.297	0	0	310.071	356.531	255.264	0	0	893	14.8833
908	1.5	14.9		0.272	1.5	0.284	1.5	0.198	0	0	0	0	0.408	0.426	0.297	0	0	310.479	356.957	255.561	0	0	894	14.9
909	1.5	14.9167		0.272	1.5	0.283	1.5	0.198	0	0	0	0	0.408	0.4245	0.297	0	0	310.887	357.382	255.858	0	0	895	14.9167
910	1.5	14.9333		0.272	1.5	0.283	1.5	0.198	0	0	0	0	0.408	0.4245	0.297	0	0	311.295	357.806	256.155	0	0	896	14.9333
911	1.5	14.95		0.271	1.5	0.282	1.5	0.198	0	0	0	0	0.4065	0.423	0.297	0	0	311.701	358.229	256.452	0	0	897	14.95
912	1.5	14.9667		0.271	1.5	0.283	1.5	0.197	0	0	0	0	0.4065	0.4245	0.2955	0	0	312.108	358.654	256.748	0	0	898	14.9667
913	1.5	14.9833		0.271	1.5	0.283	1.5	0.198	0	0	0	0	0.4065	0.4245	0.297	0	0	312.514	359.078	257.045	0	0	899	14.9833
914	1.5	15		0.271	1.5	0.282	1.5	0.197	0	0	0	0	0.4065	0.423	0.2955	0	0	312.921	359.501	257.34	0	0	900	15
915	1.5	15.0167		0.271	1.5	0.282	1.5	0.197	0	0	0	0	0.4065	0.423	0.2955	0	0	313.327	359.924	257.636	0	0	901	15.0167
916	1.5	15.0333		0.271	1.5	0.281	1.5	0.197	0	0	0	0	0.4065	0.4215	0.2955	0	0	313.734	360.346	257.931	0	0	902	15.0333
917	1.5	15.05		0.271	1.5	0.281	1.5	0.197	0	0	0	0	0.4065	0.4215	0.2955	0	0	314.14	360.767	258.227	0	0	903	15.05
918	1.5	15.0667		0.271	1.5	0.281	1.5	0.197	0	0	0	0	0.4065	0.4215	0.2955	0	0	314.547	361.189	258.522	0	0	904	15.0667
919	1.5	15.0833		0.271	1.5	0.281	1.5	0.207	0	0	0	0	0.4065	0.4215	0.3105	0	0	314.953	361.61	258.833	0	0	905	15.0833
920	1.5	15.1		0.271	1.5	0.28	1.5	0.22	0	0	0	0	0.4065	0.42	0.33	0	0	315.36	362.03	259.163	0	0	906	15.1
921	1.5	15.1167		0.271	1.5	0.28	1.5	0.223	0	0	0	0	0.4065	0.42	0.3345	0	0	315.766	362.45	259.497	0	0	907	15.1167
922	1.5	15.1333		0.27	1.5	0.819	1.5	0.223	0	0	0	0	0.405	1.2285	0.3345	0	0	316.171	363.679	259.832	0	0	908	15.1333
923	1.5	15.15		0.27	1.5	0.295	1.5	0.224	0	0	0	0	0.405	0.4425	0.336	0	0	316.576	364.121	260.168	0	0	909	15.15
924	1.5	15.1667		0.27	1.5	0.293	1.5	0.223	0	0	0	0	0.405	0.4395	0.3345	0	0	316.981	364.561	260.502	0	0	910	15.1667
925	1.5	15.1833		0.287	1.5	0.29	1.5	0.223	0	0	0	0	0.4305	0.435	0.3345	0	0	317.412	364.996	260.837	0	0	911	15.1833
926	1.5	15.2		0.286	1.5	0.288	1.5	0.223	0	0	0	0	0.429	0.432	0.3345	0	0	317.841	365.428	261.171	0	0	912	15.2
927	1.5	15.2167		0.284	1.5	0.286	1.5	0.224	0	0	0	0	0.426	0.429	0.336	0	0	318.267	365.857	261.507	0	0	913	15.2167
928	1.5	15.2333		0.282	1.5	0.285	1.5	0.224	0	0	0	0	0.423	0.4275	0.336	0	0	318.69	366.284	261.843	0	0	914	15.2333
929	1.5	15.25		0.279	1.5	0.284	1.5	0.224	0	0	0	0	0.4185	0.426	0.336	0	0	319.108	366.71	262.179	0	0	915	15.25
930	1.5	15.2667		0.278	1.5	0.283	1.5	0.224	0	0	0	0	0.417	0.4245	0.336	0	0	319.525	367.135	262.515	0	0	916	15.2667
931	1.5	15.2833		0.277	1.5	0.282	1.5	0.224	0	0	0	0	0.4155	0.423	0.336	0	0	319.941	367.558	262.851	0	0	917	15.2833
932	1.5	15.3		0.275	1.5	0.281	1.5	0.224	0	0	0	0	0.4125	0.4215	0.336	0	0	320.353	367.979	263.187	0	0	918	15.3
933	1.5	15.3167		0.274	1.5	0.28	1.5	0.224	0	0	0	0	0.411	0.42	0.336	0	0	320.764	368.399	263.523	0	0	919	15.3167
934	1.5	15.3333		0.273	1.5	0.28	1.5	0.225	0	0	0	0	0.4095	0.42	0.3375	0	0	321.174	368.819	263.861	0	0	920	15.3333
935	1.5	15.35		0.273	1.5	0.28	1.5	0.225	0	0	0	0	0.4095	0.42	0.3375	0	0	321.583	369.239	264.198	0	0	921	15.35
936	1.5	15.3667		0.273	1.5	0.28	1.5	0.225	0	0	0	0	0.4095	0.42	0.3375	0	0	321.993	369.659	264.536	0	0	922	15.3667
937	1.5	15.3833		0.272	1.5	0.28	1.5	0.225	0	0	0	0	0.408	0.42	0.3375	0	0	322.401	370.079	264.873	0	0	923	15.3833
938	1.5	15.4		0.272	1.5	0.279	1.5	0.225	0	0	0	0	0.408	0.4185	0.3375	0	0	322.809	370.498	265.211	0	0	924	15.4
939	1.5	15.4167		0.272	1.5	0.279	1.5	0.225	0	0	0	0	0.408	0.4185	0.3375	0	0	323.217	370.916	265.548	0	0	925	15.4167
940	1.5	15.4333		0.272	1.5	0.279	1.5	0.225	0	0	0	0	0.408	0.4185	0.3375	0	0	323.625	371.335	265.886	0	0	926	15.4333
941	1.5	15.45		0.271	1.5	0.278	1.5	0.225	0	0	0	0	0.4065	0.417	0.3375	0	0	324.031	371.752	266.223	0	0	927	15.45
942	1.5	15.4667		0.271	1.5	0.278	1.5	0.225	0	0	0	0	0.4065	0.417	0.3375	0	0	324.438	372.169	266.561	0	0	928	15.4667
943	1.5	15.4833		0.271	1.5	0.278	1.5	0.225	0	0	0	0	0.4065	0.417	0.3375	0	0	324.844	372.586	266.898	0	0	929	15.4833
944	1.5	15.5		0.271	1.5	0.278	1.5	0.225	0	0	0	0	0.4065	0.417	0.3375	0	0	325.251	373.003	267.236	0	0	930	15.5
945	1.5	15.5167		0.27	1.5	0.278	1.5	0.225	0	0	0	0	0.405	0.417	0.3375	0	0	325.656	373.42	267.573	0	0	931	15.5167
946	1.5	15.5333		0.27	1.5	0.277	1.5	0.225	0	0	0	0	0.405	0.4155	0.3375	0	0	326.061	373.835	267.911	0	0	932	15.5333
947	1.5	15.55		0.271	1.5	0.277	1.5	0.225	0	0	0	0	0.4065	0.4155	0.3375	0	0	326.467	374.251	268.248	0	0	933	15.55
948	1.5	15.5667		0.27	1.5	0.277	1.5	0.225	0	0	0	0	0.405	0.4155	0.3375	0	0	326.872	374.666	268.586	0	0	934	15.5667
949	1.5	15.5833		0.27	1.5	0.276	1.5	0.192	0	0	0	0	0.405	0.414	0.288	0	0	327.277	375.08	268.874	0	0	935	15.5833
950	1.5	15.6		0.27	1.5	0.276	1.5	0.213	0	0	0	0	0.405	0.414	0.3195	0	0	327.682	375.494	269.193	0	0	936	15.6
951	1.5	15.6167		0.27	1.5	0.276	1.5	0.219	0	0	0	0	0.405	0.414	0.3285	0	0	328.087	375.908	269.522	0	0	937	15.6167
952	1.5	15.6333		0.27	3.12	0.3	1.5	0.221	0	0	0	0	0.405	0.936	0.3315	0	0	328.492	376.844	269.853	0	0	938	15.6333
953	1.5	15.65		0.27	1.5	0.292	1.5	0.222	0	0	0	0	0.405	0.438	0.333	0	0	328.897	377.282	270.186	0	0	939	15.65
954	1.5	15.6667		0.281	1.5	0.291	1.5	0.222	0	0	0	0	0.4215	0.4365	0.333	0	0	329.319	377.719	270.519	0	0	940	15.6667
955	1.5	15.6833		0.286	1.5	0.289	1.5	0.222	0	0	0	0	0.429	0.4335	0.333	0	0	329.748	378.152	270.852	0	0	941	15.6833
956	1.5	15.7		0.285	1.5	0.286	1.5	0.222	0	0	0	0	0.4275	0.429	0.333	0	0	330.175	378.581	271.185	0	0	942	15.7
957	1.5	15.7167		0.283	1.5	0.285	1.5	0.223	0	0	0	0	0.4245	0.4275	0.3345	0	0	330.6	379.009	271.52	0	0	943	15.7167
958	1.5	15.7333		0.281	1.5	0.283	1.5	0.223	0	0	0	0	0.4215	0.4245	0.3345	0	0	331.021	379.433	271.854	0	0	944	15.7333
959	1.5	15.75		0.279	1.5	0.282	1.5	0.223	0	0	0	0	0.4185	0.423	0.3345	0	0	331.44	379.856	272.189	0	0	945	15.75
960	1.5	15.7667		0.277	1.5	0.281	1.5	0.223	0	0	0	0	0.4155	0.4215	0.3345	0	0	331.855	380.278	272.523	0	0	946	15.7667
961	1.5	15.7833		0.276	1.5	0.28	1.5	0.223	0	0	0	0	0.414	0.42	0.3345	0	0	332.269	380.698	272.858	0	0	947	15.7833
962	1.5	15.8		0.275	1.5	0.279	1.5	0.223	0	0	0	0	0.4125	0.4185	0.3345	0	0	332.682	381.116	273.192	0	0	948	15.8
963	1.5	15.8167		0.274	1.5	0.278	1.5	0.223	0	0	0	0	0.411	0.417	0.3345	0	0	333.093	381.533	273.527	0	0	949	15.8167
964	1.5	15.8333		0.274	1.5	0.278	1.5	0.223	0	0	0	0	0.411	0.417	0.3345	0	0	333.504	381.95	273.861	0	0	950	15.8333
965	1.5	15.85		0.273	1.5	0.277	1.5	0.224	0	0	0	0	0.4095	0.4155	0.336	0	0	333.913	382.366	274.197	0	0	951	15.85
966	1.5	15.8667		0.273	1.5	0.28	1.5	0.223	0	0	0	0	0.4095	0.42	0.3345	0	0	334.323	382.786	274.532	0	0	952	15.8667
967	1.5	15.8833		0.272	1.5	0.282	1.5	0.224	0	0	0	0	0.408	0.423	0.336	0	0	334.731	383.209	274.868	0	0	953	15.8833
968	1.5	15.9		0.272	1.5	0.283	1.5	0.224	0	0	0	0	0.408	0.4245	0.336	0	0	335.139	383.633	275.204	0	0	954	15.9
969	1.5	15.9167		0.272	1.5	0.283	1.5	0.224	0	0	0	0	0.408	0.4245	0.336	0	0	335.547	384.058	275.54	0	0	955	15.9167
970	1.5	15.9333		0.272	1.5	0.283	1.5	0.224	0	0	0	0	0.408	0.4245	0.336	0	0	335.955	384.482	275.876	0	0	956	15.9333
971	1.5	15.95		0.272	1.5	0.283	1.5	0.224	0	0	0	0	0.408	0.4245	0.336	0	0	336.363	384.907	276.212	0	0	957	15.95
972	1.5	15.9667		0.271	1.5	0.283	1.5	0.224	0	0	0	0	0.4065	0.4245	0.336	0	0	336.769	385.331	276.548	0	0	958	15.9667
973	1.5	15.9833		0.272	1.5	0.283	1.5	0.224	0	0	0	0	0.408	0.4245	0.336	0	0	337.177	385.756	276.884	0	0	959	15.9833
974	1.5	16		0.272	1.5	0.283	1.5	0.223	0	0	0	0	0.408	0.4245	0.3345	0	0	337.585	386.18	277.218	0	0	960	16
975	1.5	16.0167		0.272	1.5	0.283	1.5	0.223	0	0	0	0	0.408	0.4245	0.3345	0	0	337.993	386.605	277.553	0	0	961	16.0167
976	1.5	16.0333		0.271	1.5	0.282	1.5	0.223	0	0	0	0	0.4065	0.423	0.3345	0	0	338.4	387.028	277.887	0	0	962	16.0333
977	1.5	16.05		0.271	1.5	0.282	1.5	0.223	0	0	0	0	0.4065	0.423	0.3345	0	0	338.806	387.451	278.222	0	0	963	16.05
978	1.5	16.0667		0.271	1.5	0.282	1.5	0.223	0	0	0	0	0.4065	0.423	0.3345	0	0	339.213	387.874	278.556	0	0	964	16.0667
979	1.5	16.0833		0.271	1.5	0.282	1.5	0.197	0	0	0	0	0.4065	0.423	0.2955	0	0	339.619	388.297	278.852	0	0	965	16.0833
980	1.5	16.1		0.271	1.5	0.282	1.5	0.22	0	0	0	0	0.4065	0.423	0.33	0	0	340.026	388.72	279.182	0	0	966	16.1
981	1.5	16.1167		0.271	1.5	0.281	1.5	0.225	0	0	0	0	0.4065	0.4215	0.3375	0	0	340.432	389.141	279.519	0	0	967	16.1167
982	1.5	16.1333		0.271	1.5	0.914	1.5	0.227	0	0	0	0	0.4065	1.371	0.3405	0	0	340.839	390.512	279.86	0	0	968	16.1333
983	1.5	16.15		0.27	1.5	0.292	1.5	0.228	0	0	0	0	0.405	0.438	0.342	0	0	341.244	390.95	280.202	0	0	969	16.15
984	1.5	16.1667		0.346	1.5	0.29	1.5	0.228	0	0	0	0	0.519	0.435	0.342	0	0	341.763	391.385	280.544	0	0	970	16.1667
985	1.5	16.1833		0.287	1.5	0.287	1.5	0.229	0	0	0	0	0.4305	0.4305	0.3435	0	0	342.193	391.816	280.887	0	0	971	16.1833
986	1.5	16.2		0.285	1.5	0.286	1.5	0.229	0	0	0	0	0.4275	0.429	0.3435	0	0	342.621	392.245	281.231	0	0	972	16.2
987	1.5	16.2167		0.283	1.5	0.285	1.5	0.229	0	0	0	0	0.4245	0.4275	0.3435	0	0	343.045	392.672	281.574	0	0	973	16.2167
988	1.5	16.2333		0.281	1.5	0.283	1.5	0.23	0	0	0	0	0.4215	0.4245	0.345	0	0	343.467	393.097	281.919	0	0	974	16.2333
989	1.5	16.25		0.279	1.5	0.282	1.5	0.23	0	0	0	0	0.4185	0.423	0.345	0	0	343.885	393.52	282.264	0	0	975	16.25
990	1.5	16.2667		0.277	1.5	0.282	1.5	0.23	0	0	0	0	0.4155	0.423	0.345	0	0	344.301	393.943	282.609	0	0	976	16.2667
991	1.5	16.2833		0.276	1.5	0.281	1.5	0.23	0	0	0	0	0.414	0.4215	0.345	0	0	344.715	394.364	282.954	0	0	977	16.2833
992	1.5	16.3		0.275	1.5	0.28	1.5	0.23	0	0	0	0	0.4125	0.42	0.345	0	0	345.127	394.784	283.299	0	0	978	16.3
993	1.5	16.3167		0.274	1.5	0.28	1.5	0.23	0	0	0	0	0.411	0.42	0.345	0	0	345.538	395.204	283.644	0	0	979	16.3167
994	1.5	16.3333		0.274	1.5	0.279	1.5	0.23	0	0	0	0	0.411	0.4185	0.345	0	0	345.949	395.623	283.989	0	0	980	16.3333
995	1.5	16.35		0.273	1.5	0.28	1.5	0.23	0	0	0	0	0.4095	0.42	0.345	0	0	346.359	396.043	284.334	0	0	981	16.35
996	1.5	16.3667		0.273	1.5	0.279	1.5	0.23	0	0	0	0	0.4095	0.4185	0.345	0	0	346.768	396.461	284.679	0	0	982	16.3667
997	1.5	16.3833		0.272	1.5	0.279	1.5	0.23	0	0	0	0	0.408	0.4185	0.345	0	0	347.176	396.88	285.024	0	0	983	16.3833
998	1.5	16.4		0.272	1.5	0.279	1.5	0.23	0	0	0	0	0.408	0.4185	0.345	0	0	347.584	397.298	285.369	0	0	984	16.4
999	1.5	16.4167		0.272	1.5	0.279	1.5	0.231	0	0	0	0	0.408	0.4185	0.3465	0	0	347.992	397.717	285.716	0	0	985	16.4167
1000	1.5	16.4333		0.272	1.5	0.279	1.5	0.231	0	0	0	0	0.408	0.4185	0.3465	0	0	348.4	398.135	286.062	0	0	986	16.4333
1001	1.5	16.45		0.272	1.5	0.279	1.5	0.231	0	0	0	0	0.408	0.4185	0.3465	0	0	348.808	398.554	286.409	0	0	987	16.45
1002	1.5	16.4667		0.272	1.5	0.279	1.5	0.231	0	0	0	0	0.408	0.4185	0.3465	0	0	349.216	398.972	286.755	0	0	988	16.4667
1003	1.5	16.4833		0.272	1.5	0.278	1.5	0.231	0	0	0	0	0.408	0.417	0.3465	0	0	349.624	399.389	287.102	0	0	989	16.4833
1004	1.5	16.5		0.272	1.5	0.278	1.5	0.231	0	0	0	0	0.408	0.417	0.3465	0	0	350.032	399.806	287.448	0	0	990	16.5
1005	1.5	16.5167		0.272	1.5	0.278	1.5	0.231	0	0	0	0	0.408	0.417	0.3465	0	0	350.44	400.223	287.795	0	0	991	16.5167
1006	1.5	16.5333		0.272	1.5	0.278	1.5	0.231	0	0	0	0	0.408	0.417	0.3465	0	0	350.848	400.64	288.141	0	0	992	16.5333
1007	1.5	16.55		0.272	1.5	0.278	1.5	0.231	0	0	0	0	0.408	0.417	0.3465	0	0	351.256	401.057	288.488	0	0	993	16.55
1008	1.5	16.5667		0.271	1.5	0.278	1.5	0.231	0	0	0	0	0.4065	0.417	0.3465	0	0	351.663	401.474	288.834	0	0	994	16.5667
1009	1.5	16.5833		0.271	1.5	0.278	1.5	0.237	0	0	0	0	0.4065	0.417	0.3555	0	0	352.069	401.891	289.19	0	0	995	16.5833
1010	1.5	16.6		0.271	1.5	0.278	1.5	0.235	0	0	0	0	0.4065	0.417	0.3525	0	0	352.476	402.308	289.542	0	0	996	16.6
1011	1.5	16.6167		0.271	1.5	0.278	1.5	0.232	0	0	0	0	0.4065	0.417	0.348	0	0	352.882	402.725	289.89	0	0	997	16.6167
1012	1.5	16.6333		0.271	3.44	0.297	1.5	0.23	0	0	0	0	0.4065	1.02168	0.345	0	0	353.289	403.747	290.235	0	0	998	16.6333
1013	1.5	16.65		0.271	1.5	0.29	1.5	0.229	0	0	0	0	0.4065	0.435	0.3435	0	0	353.695	404.182	290.579	0	0	999	16.65
1014	1.5	16.6667		0.409	1.5	0.288	1.5	0.222	0	0	0	0	0.6135	0.432	0.333	0	0	354.309	404.614	290.912	0	0	1000	16.6667
1015	1.5	16.6833		0.287	1.5	0.286	1.5	0.22	0	0	0	0	0.4305	0.429	0.33	0	0	354.739	405.043	291.242	0	0	1001	16.6833
1016	1.5	16.7		0.286	1.5	0.284	1.5	0.219	0	0	0	0	0.429	0.426	0.3285	0	0	355.168	405.469	291.57	0	0	1002	16.7
1017	1.5	16.7167		0.284	1.5	0.283	1.5	0.219	0	0	0	0	0.426	0.4245	0.3285	0	0	355.594	405.893	291.899	0	0	1003	16.7167
1018	1.5	16.7333		0.282	1.5	0.281	1.5	0.218	0	0	0	0	0.423	0.4215	0.327	0	0	356.017	406.315	292.226	0	0	1004	16.7333
1019	1.5	16.75		0.28	1.5	0.28	1.5	0.218	0	0	0	0	0.42	0.42	0.327	0	0	356.437	406.735	292.553	0	0	1005	16.75
1020	1.5	16.7667		0.278	1.5	0.279	1.5	0.218	0	0	0	0	0.417	0.4185	0.327	0	0	356.854	407.153	292.88	0	0	1006	16.7667
1021	1.5	16.7833		0.277	1.5	0.278	1.5	0.217	0	0	0	0	0.4155	0.417	0.3255	0	0	357.27	407.57	293.205	0	0	1007	16.7833
1022	1.5	16.8		0.276	1.5	0.278	1.5	0.217	0	0	0	0	0.414	0.417	0.3255	0	0	357.684	407.987	293.531	0	0	1008	16.8
1023	1.5	16.8167		0.276	1.5	0.278	1.5	0.217	0	0	0	0	0.414	0.417	0.3255	0	0	358.098	408.404	293.856	0	0	1009	16.8167
1024	1.5	16.8333		0.275	1.5	0.277	1.5	0.217	0	0	0	0	0.4125	0.4155	0.3255	0	0	358.51	408.82	294.182	0	0	1010	16.8333
1025	1.5	16.85		0.274	1.5	0.277	1.5	0.217	0	0	0	0	0.411	0.4155	0.3255	0	0	358.921	409.235	294.507	0	0	1011	16.85
1026	1.5	16.8667		0.273	1.5	0.277	1.5	0.217	0	0	0	0	0.4095	0.4155	0.3255	0	0	359.331	409.651	294.833	0	0	1012	16.8667
1027	1.5	16.8833		0.273	1.5	0.277	1.5	0.216	0	0	0	0	0.4095	0.4155	0.324	0	0	359.74	410.066	295.157	0	0	1013	16.8833
1028	1.5	16.9		0.273	1.5	0.276	1.5	0.216	0	0	0	0	0.4095	0.414	0.324	0	0	360.15	410.48	295.481	0	0	1014	16.9
1029	1.5	16.9167		0.272	1.5	0.276	1.5	0.216	0	0	0	0	0.408	0.414	0.324	0	0	360.558	410.894	295.805	0	0	1015	16.9167
1030	1.5	16.9333		0.272	1.5	0.276	1.5	0.216	0	0	0	0	0.408	0.414	0.324	0	0	360.966	411.308	296.129	0	0	1016	16.9333
1031	1.5	16.95		0.272	1.5	0.276	1.5	0.215	0	0	0	0	0.408	0.414	0.3225	0	0	361.374	411.722	296.451	0	0	1017	16.95
1032	1.5	16.9667		0.271	1.5	0.276	1.5	0.215	0	0	0	0	0.4065	0.414	0.3225	0	0	361.78	412.136	296.774	0	0	1018	16.9667
1033	1.5	16.9833		0.271	1.5	0.276	1.5	0.215	0	0	0	0	0.4065	0.414	0.3225	0	0	362.187	412.55	297.096	0	0	1019	16.9833
1034	1.5	17		0.271	1.5	0.275	1.5	0.215	0	0	0	0	0.4065	0.4125	0.3225	0	0	362.593	412.963	297.419	0	0	1020	17
1035	1.5	17.0167		0.271	1.5	0.275	1.5	0.215	0	0	0	0	0.4065	0.4125	0.3225	0	0	363	413.375	297.741	0	0	1021	17.0167
1036	1.5	17.0333		0.27	1.5	0.275	1.5	0.215	0	0	0	0	0.405	0.4125	0.3225	0	0	363.405	413.788	298.064	0	0	1022	17.0333
1037	1.5	17.05		0.27	1.5	0.275	1.5	0.215	0	0	0	0	0.405	0.4125	0.3225	0	0	363.81	414.2	298.386	0	0	1023	17.05
1038	1.5	17.0667		0.27	1.5	0.275	1.5	0.215	0	0	0	0	0.405	0.4125	0.3225	0	0	364.215	414.613	298.709	0	0	1024	17.0667
1039	1.5	17.0833		0.27	1.5	0.275	1.5	0.186	0	0	0	0	0.405	0.4125	0.279	0	0	364.62	415.025	298.988	0	0	1025	17.0833
1040	1.5	17.1		0.27	1.5	0.275	1.5	0.213	0	0	0	0	0.405	0.4125	0.3195	0	0	365.025	415.438	299.307	0	0	1026	17.1
1041	1.5	17.1167		0.27	1.5	0.274	1.5	0.219	0	0	0	0	0.405	0.411	0.3285	0	0	365.43	415.849	299.636	0	0	1027	17.1167
1042	1.5	17.1333		0.27	1.5	0.995	1.5	0.221	0	0	0	0	0.405	1.4925	0.3315	0	0	365.835	417.341	299.967	0	0	1028	17.1333
1043	1.5	17.15		0.27	1.5	0.29	1.5	0.222	0	0	0	0	0.405	0.435	0.333	0	0	366.24	417.776	300.3	0	0	1029	17.15
1044	1.5	17.1667		0.461	1.5	0.288	1.5	0.223	0	0	0	0	0.6915	0.432	0.3345	0	0	366.931	418.208	300.635	0	0	1030	17.1667
1045	1.5	17.1833		0.286	1.5	0.286	1.5	0.223	0	0	0	0	0.429	0.429	0.3345	0	0	367.36	418.637	300.969	0	0	1031	17.1833
1046	1.5	17.2		0.285	1.5	0.285	1.5	0.223	0	0	0	0	0.4275	0.4275	0.3345	0	0	367.788	419.065	301.304	0	0	1032	17.2
1047	1.5	17.2167		0.283	1.5	0.283	1.5	0.224	0	0	0	0	0.4245	0.4245	0.336	0	0	368.212	419.489	301.64	0	0	1033	17.2167
1048	1.5	17.2333		0.282	1.5	0.282	1.5	0.224	0	0	0	0	0.423	0.423	0.336	0	0	368.635	419.912	301.976	0	0	1034	17.2333
1049	1.5	17.25		0.28	1.5	0.281	1.5	0.224	0	0	0	0	0.42	0.4215	0.336	0	0	369.055	420.334	302.312	0	0	1035	17.25
1050	1.5	17.2667		0.279	1.5	0.28	1.5	0.224	0	0	0	0	0.4185	0.42	0.336	0	0	369.474	420.754	302.648	0	0	1036	17.2667
1051	1.5	17.2833		0.278	1.5	0.28	1.5	0.224	0	0	0	0	0.417	0.42	0.336	0	0	369.891	421.174	302.984	0	0	1037	17.2833
1052	1.5	17.3		0.276	1.5	0.279	1.5	0.224	0	0	0	0	0.414	0.4185	0.336	0	0	370.305	421.592	303.32	0	0	1038	17.3
1053	1.5	17.3167		0.276	1.5	0.279	1.5	0.224	0	0	0	0	0.414	0.4185	0.336	0	0	370.719	422.011	303.656	0	0	1039	17.3167
1054	1.5	17.3333		0.275	1.5	0.279	1.5	0.224	0	0	0	0	0.4125	0.4185	0.336	0	0	371.131	422.429	303.992	0	0	1040	17.3333
1055	1.5	17.35		0.274	1.5	0.279	1.5	0.224	0	0	0	0	0.411	0.4185	0.336	0	0	371.542	422.848	304.328	0	0	1041	17.35
1056	1.5	17.3667		0.274	1.5	0.279	1.5	0.224	0	0	0	0	0.411	0.4185	0.336	0	0	371.953	423.266	304.664	0	0	1042	17.3667
1057	1.5	17.3833		0.273	1.5	0.279	1.5	0.224	0	0	0	0	0.4095	0.4185	0.336	0	0	372.363	423.685	305	0	0	1043	17.3833
1058	1.5	17.4		0.273	1.5	0.279	1.5	0.224	0	0	0	0	0.4095	0.4185	0.336	0	0	372.772	424.103	305.336	0	0	1044	17.4
1059	1.5	17.4167		0.273	1.5	0.278	1.5	0.224	0	0	0	0	0.4095	0.417	0.336	0	0	373.182	424.52	305.672	0	0	1045	17.4167
1060	1.5	17.4333		0.273	1.5	0.277	1.5	0.223	0	0	0	0	0.4095	0.4155	0.3345	0	0	373.591	424.936	306.006	0	0	1046	17.4333
1061	1.5	17.45		0.273	1.5	0.277	1.5	0.223	0	0	0	0	0.4095	0.4155	0.3345	0	0	374.001	425.351	306.341	0	0	1047	17.45
1062	1.5	17.4667		0.273	1.5	0.277	1.5	0.223	0	0	0	0	0.4095	0.4155	0.3345	0	0	374.41	425.767	306.675	0	0	1048	17.4667
1063	1.5	17.4833		0.273	1.5	0.277	1.5	0.223	0	0	0	0	0.4095	0.4155	0.3345	0	0	374.82	426.182	307.01	0	0	1049	17.4833
1064	1.5	17.5		0.273	1.5	0.276	1.5	0.223	0	0	0	0	0.4095	0.414	0.3345	0	0	375.229	426.596	307.344	0	0	1050	17.5
1065	1.5	17.5167		0.273	1.5	0.277	1.5	0.223	0	0	0	0	0.4095	0.4155	0.3345	0	0	375.639	427.012	307.679	0	0	1051	17.5167
1066	1.5	17.5333		0.272	1.5	0.276	1.5	0.223	0	0	0	0	0.408	0.414	0.3345	0	0	376.047	427.426	308.013	0	0	1052	17.5333
1067	1.5	17.55		0.272	1.5	0.276	1.5	0.223	0	0	0	0	0.408	0.414	0.3345	0	0	376.455	427.84	308.348	0	0	1053	17.55
1068	1.5	17.5667		0.272	1.5	0.276	1.5	0.223	0	0	0	0	0.408	0.414	0.3345	0	0	376.863	428.254	308.682	0	0	1054	17.5667
1069	1.5	17.5833		0.272	1.5	0.275	1.5	0.2	0	0	0	0	0.408	0.4125	0.3	0	0	377.271	428.666	308.982	0	0	1055	17.5833
1070	1.5	17.6		0.272	1.5	0.275	1.5	0.222	0	0	0	0	0.408	0.4125	0.333	0	0	377.679	429.079	309.315	0	0	1056	17.6
1071	1.5	17.6167		0.272	1.5	0.275	1.5	0.226	0	0	0	0	0.408	0.4125	0.339	0	0	378.087	429.491	309.654	0	0	1057	17.6167
1072	1.5	17.6333		0.272	3.62	0.3	1.5	0.227	0	0	0	0	0.408	1.086	0.3405	0	0	378.495	430.577	309.995	0	0	1058	17.6333
1073	1.5	17.65		0.273	1.5	0.291	1.5	0.228	0	0	0	0	0.4095	0.4365	0.342	0	0	378.904	431.014	310.337	0	0	1059	17.65
1074	1.5	17.6667		0.514	1.5	0.289	1.5	0.228	0	0	0	0	0.771	0.4335	0.342	0	0	379.675	431.447	310.679	0	0	1060	17.6667
1075	1.5	17.6833		0.288	1.5	0.287	1.5	0.229	0	0	0	0	0.432	0.4305	0.3435	0	0	380.107	431.878	311.022	0	0	1061	17.6833
1076	1.5	17.7		0.286	1.5	0.284	1.5	0.229	0	0	0	0	0.429	0.426	0.3435	0	0	380.536	432.304	311.366	0	0	1062	17.7
1077	1.5	17.7167		0.285	1.5	0.283	1.5	0.229	0	0	0	0	0.4275	0.4245	0.3435	0	0	380.964	432.728	311.709	0	0	1063	17.7167
1078	1.5	17.7333		0.283	1.5	0.282	1.5	0.229	0	0	0	0	0.4245	0.423	0.3435	0	0	381.388	433.151	312.053	0	0	1064	17.7333
1079	1.5	17.75		0.281	1.5	0.281	1.5	0.23	0	0	0	0	0.4215	0.4215	0.345	0	0	381.81	433.573	312.398	0	0	1065	17.75
1080	1.5	17.7667		0.28	1.5	0.28	1.5	0.23	0	0	0	0	0.42	0.42	0.345	0	0	382.23	433.993	312.743	0	0	1066	17.7667
1081	1.5	17.7833		0.279	1.5	0.279	1.5	0.229	0	0	0	0	0.4185	0.4185	0.3435	0	0	382.648	434.411	313.086	0	0	1067	17.7833
1082	1.5	17.8		0.278	1.5	0.279	1.5	0.229	0	0	0	0	0.417	0.4185	0.3435	0	0	383.065	434.83	313.43	0	0	1068	17.8
1083	1.5	17.8167		0.277	1.5	0.278	1.5	0.23	0	0	0	0	0.4155	0.417	0.345	0	0	383.481	435.247	313.775	0	0	1069	17.8167
1084	1.5	17.8333		0.276	1.5	0.277	1.5	0.23	0	0	0	0	0.414	0.4155	0.345	0	0	383.895	435.662	314.12	0	0	1070	17.8333
1085	1.5	17.85		0.276	1.5	0.277	1.5	0.23	0	0	0	0	0.414	0.4155	0.345	0	0	384.309	436.078	314.465	0	0	1071	17.85
1086	1.5	17.8667		0.276	1.5	0.277	1.5	0.23	0	0	0	0	0.414	0.4155	0.345	0	0	384.723	436.493	314.81	0	0	1072	17.8667
1087	1.5	17.8833		0.275	1.5	0.277	1.5	0.23	0	0	0	0	0.4125	0.4155	0.345	0	0	385.135	436.909	315.155	0	0	1073	17.8833
1088	1.5	17.9		0.275	1.5	0.276	1.5	0.231	0	0	0	0	0.4125	0.414	0.3465	0	0	385.548	437.323	315.501	0	0	1074	17.9
1089	1.5	17.9167		0.275	1.5	0.276	1.5	0.231	0	0	0	0	0.4125	0.414	0.3465	0	0	385.96	437.737	315.848	0	0	1075	17.9167
1090	1.5	17.9333		0.274	1.5	0.276	1.5	0.231	0	0	0	0	0.411	0.414	0.3465	0	0	386.371	438.151	316.194	0	0	1076	17.9333
1091	1.5	17.95		0.274	1.5	0.275	1.5	0.231	0	0	0	0	0.411	0.4125	0.3465	0	0	386.782	438.563	316.541	0	0	1077	17.95
1092	1.5	17.9667		0.274	1.5	0.275	1.5	0.231	0	0	0	0	0.411	0.4125	0.3465	0	0	387.193	438.976	316.887	0	0	1078	17.9667
1093	1.5	17.9833		0.274	1.5	0.275	1.5	0.231	0	0	0	0	0.411	0.4125	0.3465	0	0	387.604	439.388	317.234	0	0	1079	17.9833
1094	1.5	18		0.274	1.5	0.274	1.5	0.231	0	0	0	0	0.411	0.411	0.3465	0	0	388.015	439.799	317.58	0	0	1080	18
1095	1.5	18.0167		0.274	1.5	0.274	1.5	0.231	0	0	0	0	0.411	0.411	0.3465	0	0	388.426	440.21	317.927	0	0	1081	18.0167
1096	1.5	18.0333		0.274	1.5	0.274	1.5	0.231	0	0	0	0	0.411	0.411	0.3465	0	0	388.837	440.621	318.273	0	0	1082	18.0333
1097	1.5	18.05		0.274	1.5	0.273	1.5	0.231	0	0	0	0	0.411	0.4095	0.3465	0	0	389.248	441.031	318.62	0	0	1083	18.05
1098	1.5	18.0667		0.274	1.5	0.273	1.5	0.231	0	0	0	0	0.411	0.4095	0.3465	0	0	389.659	441.44	318.966	0	0	1084	18.0667
1099	1.5	18.0833		0.273	1.5	0.273	1.5	0.236	0	0	0	0	0.4095	0.4095	0.354	0	0	390.069	441.85	319.32	0	0	1085	18.0833
1100	1.5	18.1		0.273	1.5	0.272	1.5	0.231	0	0	0	0	0.4095	0.408	0.3465	0	0	390.478	442.258	319.667	0	0	1086	18.1
1101	1.5	18.1167		0.273	1.5	0.272	1.5	0.226	0	0	0	0	0.4095	0.408	0.339	0	0	390.888	442.666	320.006	0	0	1087	18.1167
1102	1.5	18.1333		0.273	1.5	1	1.5	0.225	0	0	0	0	0.4095	1.5	0.3375	0	0	391.297	444.166	320.343	0	0	1088	18.1333
1103	1.5	18.15		0.273	1.5	0.288	1.5	0.223	0	0	0	0	0.4095	0.432	0.3345	0	0	391.707	444.598	320.678	0	0	1089	18.15
1104	1.5	18.1667		0.568	1.5	0.285	1.5	0.222	0	0	0	0	0.852	0.4275	0.333	0	0	392.559	445.025	321.011	0	0	1090	18.1667
1105	1.5	18.1833		0.288	1.5	0.283	1.5	0.222	0	0	0	0	0.432	0.4245	0.333	0	0	392.991	445.45	321.344	0	0	1091	18.1833
1106	1.5	18.2		0.286	1.5	0.282	1.5	0.221	0	0	0	0	0.429	0.423	0.3315	0	0	393.42	445.873	321.675	0	0	1092	18.2
1107	1.5	18.2167		0.285	1.5	0.28	1.5	0.22	0	0	0	0	0.4275	0.42	0.33	0	0	393.847	446.293	322.005	0	0	1093	18.2167
1108	1.5	18.2333		0.283	1.5	0.279	1.5	0.22	0	0	0	0	0.4245	0.4185	0.33	0	0	394.272	446.711	322.335	0	0	1094	18.2333
1109	1.5	18.25		0.281	1.5	0.278	1.5	0.22	0	0	0	0	0.4215	0.417	0.33	0	0	394.693	447.128	322.665	0	0	1095	18.25
1110	1.5	18.2667		0.28	1.5	0.277	1.5	0.22	0	0	0	0	0.42	0.4155	0.33	0	0	395.113	447.544	322.995	0	0	1096	18.2667
1111	1.5	18.2833		0.279	1.5	0.276	1.5	0.22	0	0	0	0	0.4185	0.414	0.33	0	0	395.532	447.958	323.325	0	0	1097	18.2833
1112	1.5	18.3		0.278	1.5	0.275	1.5	0.22	0	0	0	0	0.417	0.4125	0.33	0	0	395.949	448.37	323.655	0	0	1098	18.3
1113	1.5	18.3167		0.278	1.5	0.274	1.5	0.219	0	0	0	0	0.417	0.411	0.3285	0	0	396.366	448.781	323.984	0	0	1099	18.3167
1114	1.5	18.3333		0.277	1.5	0.274	1.5	0.219	0	0	0	0	0.4155	0.411	0.3285	0	0	396.781	449.192	324.312	0	0	1100	18.3333
1115	1.5	18.35		0.276	1.5	0.273	1.5	0.219	0	0	0	0	0.414	0.4095	0.3285	0	0	397.195	449.602	324.641	0	0	1101	18.35
1116	1.5	18.3667		0.276	1.5	0.273	1.5	0.219	0	0	0	0	0.414	0.4095	0.3285	0	0	397.609	450.011	324.969	0	0	1102	18.3667
1117	1.5	18.3833		0.276	1.5	0.273	1.5	0.218	0	0	0	0	0.414	0.4095	0.327	0	0	398.023	450.421	325.296	0	0	1103	18.3833
1118	1.5	18.4		0.276	1.5	0.273	1.5	0.218	0	0	0	0	0.414	0.4095	0.327	0	0	398.437	450.83	325.623	0	0	1104	18.4
1119	1.5	18.4167		0.276	1.5	0.273	1.5	0.218	0	0	0	0	0.414	0.4095	0.327	0	0	398.851	451.24	325.95	0	0	1105	18.4167
1120	1.5	18.4333		0.275	1.5	0.273	1.5	0.218	0	0	0	0	0.4125	0.4095	0.327	0	0	399.264	451.649	326.277	0	0	1106	18.4333
1121	1.5	18.45		0.275	1.5	0.273	1.5	0.218	0	0	0	0	0.4125	0.4095	0.327	0	0	399.676	452.059	326.604	0	0	1107	18.45
1122	1.5	18.4667		0.275	1.5	0.273	1.5	0.218	0	0	0	0	0.4125	0.4095	0.327	0	0	400.089	452.468	326.931	0	0	1108	18.4667
1123	1.5	18.4833		0.275	1.5	0.272	1.5	0.218	0	0	0	0	0.4125	0.408	0.327	0	0	400.501	452.876	327.258	0	0	1109	18.4833
1124	1.5	18.5		0.274	1.5	0.272	1.5	0.218	0	0	0	0	0.411	0.408	0.327	0	0	400.912	453.284	327.585	0	0	1110	18.5
1125	1.5	18.5167		0.274	1.5	0.272	1.5	0.217	0	0	0	0	0.411	0.408	0.3255	0	0	401.323	453.692	327.911	0	0	1111	18.5167
1126	1.5	18.5333		0.274	1.5	0.272	1.5	0.217	0	0	0	0	0.411	0.408	0.3255	0	0	401.734	454.1	328.236	0	0	1112	18.5333
1127	1.5	18.55		0.274	1.5	0.272	1.5	0.217	0	0	0	0	0.411	0.408	0.3255	0	0	402.145	454.508	328.562	0	0	1113	18.55
1128	1.5	18.5667		0.274	1.5	0.272	1.5	0.217	0	0	0	0	0.411	0.408	0.3255	0	0	402.556	454.916	328.887	0	0	1114	18.5667
1129	1.5	18.5833		0.274	1.5	0.272	1.5	0.193	0	0	0	0	0.411	0.408	0.2895	0	0	402.967	455.324	329.177	0	0	1115	18.5833
1130	1.5	18.6		0.274	1.5	0.272	1.5	0.228	0	0	0	0	0.411	0.408	0.342	0	0	403.378	455.732	329.519	0	0	1116	18.6
1131	1.5	18.6167		0.274	1.5	0.272	1.5	0.234	0	0	0	0	0.411	0.408	0.351	0	0	403.789	456.14	329.87	0	0	1117	18.6167
1132	1.5	18.6333		0.274	3.66	0.299	1.5	0.236	0	0	0	0	0.411	1.09434	0.354	0	0	404.2	457.235	330.224	0	0	1118	18.6333
1133	1.5	18.65		0.274	1.5	0.291	1.5	0.231	0	0	0	0	0.411	0.4365	0.3465	0	0	404.611	457.671	330.57	0	0	1119	18.65
1134	1.5	18.6667		0.62	1.5	0.289	1.5	0.23	0	0	0	0	0.93	0.4335	0.345	0	0	405.541	458.105	330.915	0	0	1120	18.6667
1135	1.5	18.6833		0.289	1.5	0.287	1.5	0.23	0	0	0	0	0.4335	0.4305	0.345	0	0	405.975	458.535	331.26	0	0	1121	18.6833
1136	1.5	18.7		0.287	1.5	0.286	1.5	0.23	0	0	0	0	0.4305	0.429	0.345	0	0	406.405	458.964	331.605	0	0	1122	18.7
1137	1.5	18.7167		0.285	1.5	0.284	1.5	0.231	0	0	0	0	0.4275	0.426	0.3465	0	0	406.833	459.39	331.952	0	0	1123	18.7167
1138	1.5	18.7333		0.284	1.5	0.283	1.5	0.231	0	0	0	0	0.426	0.4245	0.3465	0	0	407.259	459.815	332.298	0	0	1124	18.7333
1139	1.5	18.75		0.282	1.5	0.282	1.5	0.231	0	0	0	0	0.423	0.423	0.3465	0	0	407.682	460.238	332.645	0	0	1125	18.75
1140	1.5	18.7667		0.281	1.5	0.281	1.5	0.231	0	0	0	0	0.4215	0.4215	0.3465	0	0	408.103	460.659	332.991	0	0	1126	18.7667
1141	1.5	18.7833		0.28	1.5	0.281	1.5	0.231	0	0	0	0	0.42	0.4215	0.3465	0	0	408.523	461.081	333.338	0	0	1127	18.7833
1142	1.5	18.8		0.279	1.5	0.28	1.5	0.231	0	0	0	0	0.4185	0.42	0.3465	0	0	408.942	461.501	333.684	0	0	1128	18.8
1143	1.5	18.8167		0.279	1.5	0.28	1.5	0.23	0	0	0	0	0.4185	0.42	0.345	0	0	409.36	461.921	334.029	0	0	1129	18.8167
1144	1.5	18.8333		0.278	1.5	0.279	1.5	0.231	0	0	0	0	0.417	0.4185	0.3465	0	0	409.777	462.339	334.376	0	0	1130	18.8333
1145	1.5	18.85		0.278	1.5	0.279	1.5	0.231	0	0	0	0	0.417	0.4185	0.3465	0	0	410.194	462.758	334.722	0	0	1131	18.85
1146	1.5	18.8667		0.277	1.5	0.278	1.5	0.231	0	0	0	0	0.4155	0.417	0.3465	0	0	410.61	463.175	335.069	0	0	1132	18.8667
1147	1.5	18.8833		0.277	1.5	0.278	1.5	0.231	0	0	0	0	0.4155	0.417	0.3465	0	0	411.025	463.592	335.415	0	0	1133	18.8833
1148	1.5	18.9		0.277	1.5	0.278	1.5	0.231	0	0	0	0	0.4155	0.417	0.3465	0	0	411.441	464.009	335.762	0	0	1134	18.9
1149	1.5	18.9167		0.277	1.5	0.277	1.5	0.231	0	0	0	0	0.4155	0.4155	0.3465	0	0	411.856	464.424	336.108	0	0	1135	18.9167
1150	1.5	18.9333		0.277	1.5	0.277	1.5	0.231	0	0	0	0	0.4155	0.4155	0.3465	0	0	412.272	464.84	336.455	0	0	1136	18.9333
1151	1.5	18.95		0.276	1.5	0.277	1.5	0.231	0	0	0	0	0.414	0.4155	0.3465	0	0	412.686	465.255	336.801	0	0	1137	18.95
1152	1.5	18.9667		0.276	1.5	0.277	1.5	0.231	0	0	0	0	0.414	0.4155	0.3465	0	0	413.1	465.671	337.148	0	0	1138	18.9667
1153	1.5	18.9833		0.276	1.5	0.275	1.5	0.231	0	0	0	0	0.414	0.4125	0.3465	0	0	413.514	466.083	337.494	0	0	1139	18.9833
1154	1.5	19		0.276	1.5	0.275	1.5	0.231	0	0	0	0	0.414	0.4125	0.3465	0	0	413.928	466.496	337.841	0	0	1140	19
1155	1.5	19.0167		0.276	1.5	0.275	1.5	0.231	0	0	0	0	0.414	0.4125	0.3465	0	0	414.342	466.908	338.187	0	0	1141	19.0167
1156	1.5	19.0333		0.276	1.5	0.275	1.5	0.231	0	0	0	0	0.414	0.4125	0.3465	0	0	414.756	467.321	338.534	0	0	1142	19.0333
1157	1.5	19.05		0.276	1.5	0.275	1.5	0.231	0	0	0	0	0.414	0.4125	0.3465	0	0	415.17	467.733	338.88	0	0	1143	19.05
1158	1.5	19.0667		0.276	1.5	0.275	1.5	0.231	0	0	0	0	0.414	0.4125	0.3465	0	0	415.584	468.146	339.227	0	0	1144	19.0667
1159	1.5	19.0833		0.276	1.5	0.275	1.5	0.231	0	0	0	0	0.414	0.4125	0.3465	0	0	415.998	468.558	339.573	0	0	1145	19.0833
1160	1.5	19.1		0.276	1.5	0.276	1.5	0.228	0	0	0	0	0.414	0.414	0.342	0	0	416.412	468.972	339.915	0	0	1146	19.1
1161	1.5	19.1167		0.276	1.5	0.276	1.5	0.225	0	0	0	0	0.414	0.414	0.3375	0	0	416.826	469.386	340.253	0	0	1147	19.1167
1162	1.5	19.1333		0.276	1.5	1	1.5	0.223	0	0	0	0	0.414	1.5	0.3345	0	0	417.24	470.886	340.587	0	0	1148	19.1333
1163	1.5	19.15		0.276	1.5	0.292	1.5	0.222	0	0	0	0	0.414	0.438	0.333	0	0	417.654	471.324	340.92	0	0	1149	19.15
1164	1.5	19.1667		0.673	1.5	0.289	1.5	0.221	0	0	0	0	1.0095	0.4335	0.3315	0	0	418.663	471.758	341.252	0	0	1150	19.1667
1165	1.5	19.1833		0.29	1.5	0.287	1.5	0.221	0	0	0	0	0.435	0.4305	0.3315	0	0	419.098	472.188	341.583	0	0	1151	19.1833
1166	1.5	19.2		0.288	1.5	0.286	1.5	0.221	0	0	0	0	0.432	0.429	0.3315	0	0	419.53	472.617	341.915	0	0	1152	19.2
1167	1.5	19.2167		0.286	1.5	0.284	1.5	0.22	0	0	0	0	0.429	0.426	0.33	0	0	419.959	473.043	342.245	0	0	1153	19.2167
1168	1.5	19.2333		0.285	1.5	0.283	1.5	0.22	0	0	0	0	0.4275	0.4245	0.33	0	0	420.387	473.468	342.575	0	0	1154	19.2333
1169	1.5	19.25		0.283	1.5	0.283	1.5	0.22	0	0	0	0	0.4245	0.4245	0.33	0	0	420.811	473.892	342.905	0	0	1155	19.25
1170	1.5	19.2667		0.282	1.5	0.282	1.5	0.22	0	0	0	0	0.423	0.423	0.33	0	0	421.234	474.315	343.235	0	0	1156	19.2667
1171	1.5	19.2833		0.28	1.5	0.281	1.5	0.22	0	0	0	0	0.42	0.4215	0.33	0	0	421.654	474.737	343.565	0	0	1157	19.2833
1172	1.5	19.3		0.28	1.5	0.281	1.5	0.22	0	0	0	0	0.42	0.4215	0.33	0	0	422.074	475.158	343.895	0	0	1158	19.3
1173	1.5	19.3167		0.279	1.5	0.281	1.5	0.22	0	0	0	0	0.4185	0.4215	0.33	0	0	422.493	475.58	344.225	0	0	1159	19.3167
1174	1.5	19.3333		0.279	1.5	0.281	1.5	0.22	0	0	0	0	0.4185	0.4215	0.33	0	0	422.911	476.001	344.555	0	0	1160	19.3333
1175	1.5	19.35		0.278	1.5	0.28	1.5	0.22	0	0	0	0	0.417	0.42	0.33	0	0	423.328	476.421	344.885	0	0	1161	19.35
1176	1.5	19.3667		0.278	1.5	0.28	1.5	0.22	0	0	0	0	0.417	0.42	0.33	0	0	423.745	476.841	345.215	0	0	1162	19.3667
1177	1.5	19.3833		0.278	1.5	0.28	1.5	0.22	0	0	0	0	0.417	0.42	0.33	0	0	424.162	477.261	345.545	0	0	1163	19.3833
1178	1.5	19.4		0.278	1.5	0.28	1.5	0.22	0	0	0	0	0.417	0.42	0.33	0	0	424.579	477.681	345.875	0	0	1164	19.4
1179	1.5	19.4167		0.278	1.5	0.279	1.5	0.219	0	0	0	0	0.417	0.4185	0.3285	0	0	424.996	478.1	346.203	0	0	1165	19.4167
1180	1.5	19.4333		0.277	1.5	0.279	1.5	0.219	0	0	0	0	0.4155	0.4185	0.3285	0	0	425.412	478.518	346.532	0	0	1166	19.4333
1181	1.5	19.45		0.277	1.5	0.279	1.5	0.219	0	0	0	0	0.4155	0.4185	0.3285	0	0	425.827	478.937	346.86	0	0	1167	19.45
1182	1.5	19.4667		0.277	1.5	0.278	1.5	0.219	0	0	0	0	0.4155	0.417	0.3285	0	0	426.243	479.354	347.189	0	0	1168	19.4667
1183	1.5	19.4833		0.277	1.5	0.283	1.5	0.219	0	0	0	0	0.4155	0.4245	0.3285	0	0	426.658	479.778	347.517	0	0	1169	19.4833
1184	1.5	19.5		0.277	1.5	0.284	1.5	0.219	0	0	0	0	0.4155	0.426	0.3285	0	0	427.074	480.204	347.846	0	0	1170	19.5
1185	1.5	19.5167		0.277	1.5	0.283	1.5	0.219	0	0	0	0	0.4155	0.4245	0.3285	0	0	427.489	480.629	348.174	0	0	1171	19.5167
1186	1.5	19.5333		0.277	1.5	0.283	1.5	0.219	0	0	0	0	0.4155	0.4245	0.3285	0	0	427.905	481.053	348.503	0	0	1172	19.5333
1187	1.5	19.55		0.277	1.5	0.282	1.5	0.219	0	0	0	0	0.4155	0.423	0.3285	0	0	428.32	481.476	348.831	0	0	1173	19.55
1188	1.5	19.5667		0.277	1.5	0.283	1.5	0.219	0	0	0	0	0.4155	0.4245	0.3285	0	0	428.736	481.901	349.16	0	0	1174	19.5667
1189	1.5	19.5833		0.277	1.5	0.284	1.5	0.206	0	0	0	0	0.4155	0.426	0.309	0	0	429.151	482.327	349.469	0	0	1175	19.5833
1190	1.5	19.6		0.277	1.5	0.284	1.5	0.232	0	0	0	0	0.4155	0.426	0.348	0	0	429.567	482.753	349.817	0	0	1176	19.6
1191	1.5	19.6167		0.277	1.5	0.284	1.5	0.237	0	0	0	0	0.4155	0.426	0.3555	0	0	429.982	483.179	350.172	0	0	1177	19.6167
1192	1.5	19.6333		0.277	3.63	0.303	1.5	0.238	0	0	0	0	0.4155	1.09989	0.357	0	0	430.398	484.279	350.529	0	0	1178	19.6333
1193	1.5	19.65		0.277	1.5	0.293	1.5	0.239	0	0	0	0	0.4155	0.4395	0.3585	0	0	430.813	484.718	350.888	0	0	1179	19.65
1194	1.5	19.6667		0.725	1.5	0.291	1.5	0.239	0	0	0	0	1.0875	0.4365	0.3585	0	0	431.901	485.155	351.246	0	0	1180	19.6667
1195	1.5	19.6833		0.291	1.5	0.289	1.5	0.24	0	0	0	0	0.4365	0.4335	0.36	0	0	432.337	485.588	351.606	0	0	1181	19.6833
1196	1.5	19.7		0.289	1.5	0.288	1.5	0.24	0	0	0	0	0.4335	0.432	0.36	0	0	432.771	486.02	351.966	0	0	1182	19.7
1197	1.5	19.7167		0.287	1.5	0.286	1.5	0.241	0	0	0	0	0.4305	0.429	0.3615	0	0	433.201	486.449	352.328	0	0	1183	19.7167
1198	1.5	19.7333		0.286	1.5	0.285	1.5	0.241	0	0	0	0	0.429	0.4275	0.3615	0	0	433.63	486.877	352.689	0	0	1184	19.7333
1199	1.5	19.75		0.285	1.5	0.284	1.5	0.241	0	0	0	0	0.4275	0.426	0.3615	0	0	434.058	487.303	353.051	0	0	1185	19.75
1200	1.5	19.7667		0.284	1.5	0.283	1.5	0.241	0	0	0	0	0.426	0.4245	0.3615	0	0	434.484	487.727	353.412	0	0	1186	19.7667
1201	1.5	19.7833		0.282	1.5	0.283	1.5	0.241	0	0	0	0	0.423	0.4245	0.3615	0	0	434.907	488.152	353.774	0	0	1187	19.7833
1202	1.5	19.8		0.281	1.5	0.282	1.5	0.242	0	0	0	0	0.4215	0.423	0.363	0	0	435.328	488.575	354.137	0	0	1188	19.8
1203	1.5	19.8167		0.281	1.5	0.282	1.5	0.241	0	0	0	0	0.4215	0.423	0.3615	0	0	435.75	488.998	354.498	0	0	1189	19.8167
1204	1.5	19.8333		0.281	1.5	0.282	1.5	0.242	0	0	0	0	0.4215	0.423	0.363	0	0	436.171	489.421	354.861	0	0	1190	19.8333
1205	1.5	19.85		0.28	1.5	0.282	1.5	0.242	0	0	0	0	0.42	0.423	0.363	0	0	436.591	489.844	355.224	0	0	1191	19.85
1206	1.5	19.8667		0.279	1.5	0.281	1.5	0.242	0	0	0	0	0.4185	0.4215	0.363	0	0	437.01	490.265	355.587	0	0	1192	19.8667
1207	1.5	19.8833		0.279	1.5	0.281	1.5	0.242	0	0	0	0	0.4185	0.4215	0.363	0	0	437.428	490.687	355.95	0	0	1193	19.8833
1208	1.5	19.9		0.279	1.5	0.281	1.5	0.242	0	0	0	0	0.4185	0.4215	0.363	0	0	437.847	491.108	356.313	0	0	1194	19.9
1209	1.5	19.9167		0.278	1.5	0.282	1.5	0.242	0	0	0	0	0.417	0.423	0.363	0	0	438.264	491.531	356.676	0	0	1195	19.9167
1210	1.5	19.9333		0.278	1.5	0.283	1.5	0.242	0	0	0	0	0.417	0.4245	0.363	0	0	438.681	491.956	357.039	0	0	1196	19.9333
1211	1.5	19.95		0.278	1.5	0.283	1.5	0.242	0	0	0	0	0.417	0.4245	0.363	0	0	439.098	492.38	357.402	0	0	1197	19.95
1212	1.5	19.9667		0.278	1.5	0.282	1.5	0.242	0	0	0	0	0.417	0.423	0.363	0	0	439.515	492.803	357.765	0	0	1198	19.9667
1213	1.5	19.9833		0.278	1.5	0.283	1.5	0.242	0	0	0	0	0.417	0.4245	0.363	0	0	439.932	493.228	358.128	0	0	1199	19.9833
1214	1.5	20		0.278	1.5	0.283	1.5	0.242	0	0	0	0	0.417	0.4245	0.363	0	0	440.349	493.652	358.491	0	0	1200	20
1215	1.5	20.0167		0.278	1.5	0.283	1.5	0.243	0	0	0	0	0.417	0.4245	0.3645	0	0	440.766	494.077	358.856	0	0	1201	20.0167
1216	1.5	20.0333		0.278	1.5	0.282	1.5	0.243	0	0	0	0	0.417	0.423	0.3645	0	0	441.183	494.5	359.22	0	0	1202	20.0333
1217	1.5	20.05		0.278	1.5	0.282	1.5	0.243	0	0	0	0	0.417	0.423	0.3645	0	0	441.6	494.923	359.585	0	0	1203	20.05
1218	1.5	20.0667		0.278	1.5	0.282	1.5	0.243	0	0	0	0	0.417	0.423	0.3645	0	0	442.017	495.346	359.949	0	0	1204	20.0667
1219	1.5	20.0833		0.278	1.5	0.281	1.5	0.229	0	0	0	0	0.417	0.4215	0.3435	0	0	442.434	495.767	360.293	0	0	1205	20.0833
1220	1.5	20.1		0.278	1.5	0.281	1.5	0.226	0	0	0	0	0.417	0.4215	0.339	0	0	442.851	496.189	360.632	0	0	1206	20.1
1221	1.5	20.1167		0.278	1.5	0.281	1.5	0.222	0	0	0	0	0.417	0.4215	0.333	0	0	443.268	496.61	360.965	0	0	1207	20.1167
1222	1.5	20.1333		0.278	1.5	1	1.5	0.22	0	0	0	0	0.417	1.5	0.33	0	0	443.685	498.11	361.295	0	0	1208	20.1333
1223	1.5	20.15		0.278	1.5	0.292	1.5	0.217	0	0	0	0	0.417	0.438	0.3255	0	0	444.102	498.548	361.62	0	0	1209	20.15
1224	1.5	20.1667		0.775	1.5	0.29	1.5	0.214	0	0	0	0	1.1625	0.435	0.321	0	0	445.264	498.983	361.941	0	0	1210	20.1667
1225	1.5	20.1833		0.291	1.5	0.289	1.5	0.213	0	0	0	0	0.4365	0.4335	0.3195	0	0	445.701	499.417	362.261	0	0	1211	20.1833
1226	1.5	20.2		0.29	1.5	0.287	1.5	0.212	0	0	0	0	0.435	0.4305	0.318	0	0	446.136	499.847	362.579	0	0	1212	20.2
1227	1.5	20.2167		0.288	1.5	0.286	1.5	0.212	0	0	0	0	0.432	0.429	0.318	0	0	446.568	500.276	362.897	0	0	1213	20.2167
1228	1.5	20.2333		0.287	1.5	0.284	1.5	0.211	0	0	0	0	0.4305	0.426	0.3165	0	0	446.998	500.702	363.213	0	0	1214	20.2333
1229	1.5	20.25		0.285	1.5	0.283	1.5	0.211	0	0	0	0	0.4275	0.4245	0.3165	0	0	447.426	501.127	363.53	0	0	1215	20.25
1230	1.5	20.2667		0.284	1.5	0.282	1.5	0.211	0	0	0	0	0.426	0.423	0.3165	0	0	447.852	501.55	363.846	0	0	1216	20.2667
1231	1.5	20.2833		0.283	1.5	0.282	1.5	0.211	0	0	0	0	0.4245	0.423	0.3165	0	0	448.276	501.973	364.163	0	0	1217	20.2833
1232	1.5	20.3		0.282	1.5	0.281	1.5	0.211	0	0	0	0	0.423	0.4215	0.3165	0	0	448.699	502.394	364.479	0	0	1218	20.3
1233	1.5	20.3167		0.281	1.5	0.281	1.5	0.211	0	0	0	0	0.4215	0.4215	0.3165	0	0	449.121	502.816	364.796	0	0	1219	20.3167
1234	1.5	20.3333		0.281	1.5	0.28	1.5	0.211	0	0	0	0	0.4215	0.42	0.3165	0	0	449.542	503.236	365.112	0	0	1220	20.3333
1235	1.5	20.35		0.28	1.5	0.28	1.5	0.21	0	0	0	0	0.42	0.42	0.315	0	0	449.962	503.656	365.427	0	0	1221	20.35
1236	1.5	20.3667		0.28	1.5	0.28	1.5	0.211	0	0	0	0	0.42	0.42	0.3165	0	0	450.382	504.076	365.744	0	0	1222	20.3667
1237	1.5	20.3833		0.28	1.5	0.28	1.5	0.21	0	0	0	0	0.42	0.42	0.315	0	0	450.802	504.496	366.059	0	0	1223	20.3833
1238	1.5	20.4		0.28	1.5	0.28	1.5	0.21	0	0	0	0	0.42	0.42	0.315	0	0	451.222	504.916	366.374	0	0	1224	20.4
1239	1.5	20.4167		0.28	1.5	0.28	1.5	0.21	0	0	0	0	0.42	0.42	0.315	0	0	451.642	505.336	366.689	0	0	1225	20.4167
1240	1.5	20.4333		0.279	1.5	0.28	1.5	0.21	0	0	0	0	0.4185	0.42	0.315	0	0	452.061	505.756	367.004	0	0	1226	20.4333
1241	1.5	20.45		0.279	1.5	0.28	1.5	0.21	0	0	0	0	0.4185	0.42	0.315	0	0	452.479	506.176	367.319	0	0	1227	20.45
1242	1.5	20.4667		0.279	1.5	0.28	1.5	0.211	0	0	0	0	0.4185	0.42	0.3165	0	0	452.898	506.596	367.635	0	0	1228	20.4667
1243	1.5	20.4833		0.279	1.5	0.279	1.5	0.211	0	0	0	0	0.4185	0.4185	0.3165	0	0	453.316	507.014	367.952	0	0	1229	20.4833
1244	1.5	20.5		0.279	1.5	0.279	1.5	0.21	0	0	0	0	0.4185	0.4185	0.315	0	0	453.735	507.433	368.267	0	0	1230	20.5
1245	1.5	20.5167		0.279	1.5	0.279	1.5	0.21	0	0	0	0	0.4185	0.4185	0.315	0	0	454.153	507.851	368.582	0	0	1231	20.5167
1246	1.5	20.5333		0.279	1.5	0.279	1.5	0.21	0	0	0	0	0.4185	0.4185	0.315	0	0	454.572	508.27	368.897	0	0	1232	20.5333
1247	1.5	20.55		0.279	1.5	0.278	1.5	0.21	0	0	0	0	0.4185	0.417	0.315	0	0	454.99	508.687	369.212	0	0	1233	20.55
1248	1.5	20.5667		0.279	1.5	0.278	1.5	0.21	0	0	0	0	0.4185	0.417	0.315	0	0	455.409	509.104	369.527	0	0	1234	20.5667
1249	1.5	20.5833		0.279	1.5	0.278	1.5	0.181	0	0	0	0	0.4185	0.417	0.2715	0	0	455.827	509.521	369.798	0	0	1235	20.5833
1250	1.5	20.6		0.279	1.5	0.278	1.5	0.209	0	0	0	0	0.4185	0.417	0.3135	0	0	456.246	509.938	370.112	0	0	1236	20.6
1251	1.5	20.6167		0.279	1.5	0.279	1.5	0.219	0	0	0	0	0.4185	0.4185	0.3285	0	0	456.664	510.356	370.44	0	0	1237	20.6167
1252	1.5	20.6333		0.279	3.65	0.302	1.5	0.222	0	0	0	0	0.4185	1.1023	0.333	0	0	457.083	511.458	370.773	0	0	1238	20.6333
1253	1.5	20.65		0.279	1.5	0.292	1.5	0.223	0	0	0	0	0.4185	0.438	0.3345	0	0	457.501	511.896	371.108	0	0	1239	20.65
1254	1.5	20.6667		0.826	1.5	0.29	1.5	0.224	0	0	0	0	1.239	0.435	0.336	0	0	458.74	512.331	371.444	0	0	1240	20.6667
1255	1.5	20.6833		0.292	1.5	0.288	1.5	0.225	0	0	0	0	0.438	0.432	0.3375	0	0	459.178	512.763	371.781	0	0	1241	20.6833
1256	1.5	20.7		0.29	1.5	0.287	1.5	0.225	0	0	0	0	0.435	0.4305	0.3375	0	0	459.613	513.194	372.119	0	0	1242	20.7
1257	1.5	20.7167		0.289	1.5	0.285	1.5	0.224	0	0	0	0	0.4335	0.4275	0.336	0	0	460.047	513.621	372.455	0	0	1243	20.7167
1258	1.5	20.7333		0.287	1.5	0.284	1.5	0.225	0	0	0	0	0.4305	0.426	0.3375	0	0	460.477	514.047	372.792	0	0	1244	20.7333
1259	1.5	20.75		0.286	1.5	0.284	1.5	0.225	0	0	0	0	0.429	0.426	0.3375	0	0	460.906	514.473	373.13	0	0	1245	20.75
1260	1.5	20.7667		0.285	1.5	0.283	1.5	0.225	0	0	0	0	0.4275	0.4245	0.3375	0	0	461.334	514.898	373.467	0	0	1246	20.7667
1261	1.5	20.7833		0.284	1.5	0.282	1.5	0.225	0	0	0	0	0.426	0.423	0.3375	0	0	461.76	515.321	373.805	0	0	1247	20.7833
1262	1.5	20.8		0.283	1.5	0.282	1.5	0.225	0	0	0	0	0.4245	0.423	0.3375	0	0	462.184	515.744	374.142	0	0	1248	20.8
1263	1.5	20.8167		0.282	1.5	0.281	1.5	0.225	0	0	0	0	0.423	0.4215	0.3375	0	0	462.607	516.165	374.48	0	0	1249	20.8167
1264	1.5	20.8333		0.282	1.5	0.281	1.5	0.225	0	0	0	0	0.423	0.4215	0.3375	0	0	463.03	516.587	374.817	0	0	1250	20.8333
1265	1.5	20.85		0.281	1.5	0.281	1.5	0.225	0	0	0	0	0.4215	0.4215	0.3375	0	0	463.452	517.008	375.155	0	0	1251	20.85
1266	1.5	20.8667		0.281	1.5	0.28	1.5	0.225	0	0	0	0	0.4215	0.42	0.3375	0	0	463.873	517.428	375.492	0	0	1252	20.8667
1267	1.5	20.8833		0.28	1.5	0.28	1.5	0.225	0	0	0	0	0.42	0.42	0.3375	0	0	464.293	517.848	375.83	0	0	1253	20.8833
1268	1.5	20.9		0.28	1.5	0.28	1.5	0.225	0	0	0	0	0.42	0.42	0.3375	0	0	464.713	518.268	376.167	0	0	1254	20.9
1269	1.5	20.9167		0.28	1.5	0.28	1.5	0.226	0	0	0	0	0.42	0.42	0.339	0	0	465.133	518.688	376.506	0	0	1255	20.9167
1270	1.5	20.9333		0.28	1.5	0.28	1.5	0.226	0	0	0	0	0.42	0.42	0.339	0	0	465.553	519.108	376.845	0	0	1256	20.9333
1271	1.5	20.95		0.28	1.5	0.28	1.5	0.226	0	0	0	0	0.42	0.42	0.339	0	0	465.973	519.528	377.184	0	0	1257	20.95
1272	1.5	20.9667		0.28	1.5	0.28	1.5	0.226	0	0	0	0	0.42	0.42	0.339	0	0	466.393	519.948	377.523	0	0	1258	20.9667
1273	1.5	20.9833		0.279	1.5	0.28	1.5	0.226	0	0	0	0	0.4185	0.42	0.339	0	0	466.812	520.368	377.862	0	0	1259	20.9833
1274	1.5	21		0.279	1.5	0.28	1.5	0.226	0	0	0	0	0.4185	0.42	0.339	0	0	467.23	520.788	378.201	0	0	1260	21
1275	1.5	21.0167		0.279	1.5	0.28	1.5	0.226	0	0	0	0	0.4185	0.42	0.339	0	0	467.649	521.208	378.54	0	0	1261	21.0167
1276	1.5	21.0333		0.279	1.5	0.28	1.5	0.226	0	0	0	0	0.4185	0.42	0.339	0	0	468.067	521.628	378.879	0	0	1262	21.0333
1277	1.5	21.05		0.279	1.5	0.28	1.5	0.226	0	0	0	0	0.4185	0.42	0.339	0	0	468.486	522.048	379.218	0	0	1263	21.05
1278	1.5	21.0667		0.279	1.5	0.28	1.5	0.226	0	0	0	0	0.4185	0.42	0.339	0	0	468.904	522.468	379.557	0	0	1264	21.0667
1279	1.5	21.0833		0.278	1.5	0.281	1.5	0.178	0	0	0	0	0.417	0.4215	0.267	0	0	469.321	522.89	379.824	0	0	1265	21.0833
1280	1.5	21.1		0.278	1.5	0.281	1.5	0.22	0	0	0	0	0.417	0.4215	0.33	0	0	469.738	523.311	380.154	0	0	1266	21.1
1281	1.5	21.1167		0.278	1.5	0.282	1.5	0.23	0	0	0	0	0.417	0.423	0.345	0	0	470.155	523.734	380.499	0	0	1267	21.1167
1282	1.5	21.1333		0.278	1.5	1	1.5	0.231	0	0	0	0	0.417	1.5	0.3465	0	0	470.572	525.234	380.846	0	0	1268	21.1333
1283	1.5	21.15		0.278	1.5	0.294	1.5	0.232	0	0	0	0	0.417	0.441	0.348	0	0	470.989	525.675	381.194	0	0	1269	21.15
1284	1.5	21.1667		0.877	1.5	0.294	1.5	0.233	0	0	0	0	1.3155	0.441	0.3495	0	0	472.305	526.116	381.543	0	0	1270	21.1667
1285	1.5	21.1833		0.29	1.5	0.293	1.5	0.234	0	0	0	0	0.435	0.4395	0.351	0	0	472.74	526.556	381.894	0	0	1271	21.1833
1286	1.5	21.2		0.289	1.5	0.292	1.5	0.234	0	0	0	0	0.4335	0.438	0.351	0	0	473.173	526.994	382.245	0	0	1272	21.2
1287	1.5	21.2167		0.287	1.5	0.29	1.5	0.234	0	0	0	0	0.4305	0.435	0.351	0	0	473.604	527.429	382.596	0	0	1273	21.2167
1288	1.5	21.2333		0.286	1.5	0.289	1.5	0.235	0	0	0	0	0.429	0.4335	0.3525	0	0	474.033	527.862	382.949	0	0	1274	21.2333
1289	1.5	21.25		0.285	1.5	0.288	1.5	0.235	0	0	0	0	0.4275	0.432	0.3525	0	0	474.46	528.294	383.301	0	0	1275	21.25
1290	1.5	21.2667		0.284	1.5	0.287	1.5	0.235	0	0	0	0	0.426	0.4305	0.3525	0	0	474.886	528.725	383.654	0	0	1276	21.2667
1291	1.5	21.2833		0.282	1.5	0.287	1.5	0.235	0	0	0	0	0.423	0.4305	0.3525	0	0	475.309	529.155	384.006	0	0	1277	21.2833
1292	1.5	21.3		0.281	1.5	0.286	1.5	0.236	0	0	0	0	0.4215	0.429	0.354	0	0	475.731	529.584	384.36	0	0	1278	21.3
1293	1.5	21.3167		0.281	1.5	0.286	1.5	0.236	0	0	0	0	0.4215	0.429	0.354	0	0	476.152	530.013	384.714	0	0	1279	21.3167
1294	1.5	21.3333		0.28	1.5	0.285	1.5	0.236	0	0	0	0	0.42	0.4275	0.354	0	0	476.572	530.441	385.068	0	0	1280	21.3333
1295	1.5	21.35		0.28	1.5	0.285	1.5	0.236	0	0	0	0	0.42	0.4275	0.354	0	0	476.992	530.868	385.422	0	0	1281	21.35
1296	1.5	21.3667		0.28	1.5	0.285	1.5	0.236	0	0	0	0	0.42	0.4275	0.354	0	0	477.412	531.296	385.776	0	0	1282	21.3667
1297	1.5	21.3833		0.279	1.5	0.284	1.5	0.236	0	0	0	0	0.4185	0.426	0.354	0	0	477.831	531.722	386.13	0	0	1283	21.3833
1298	1.5	21.4		0.279	1.5	0.284	1.5	0.236	0	0	0	0	0.4185	0.426	0.354	0	0	478.249	532.148	386.484	0	0	1284	21.4
1299	1.5	21.4167		0.279	1.5	0.283	1.5	0.236	0	0	0	0	0.4185	0.4245	0.354	0	0	478.668	532.572	386.838	0	0	1285	21.4167
1300	1.5	21.4333		0.279	1.5	0.283	1.5	0.236	0	0	0	0	0.4185	0.4245	0.354	0	0	479.086	532.997	387.192	0	0	1286	21.4333
1301	1.5	21.45		0.279	1.5	0.282	1.5	0.236	0	0	0	0	0.4185	0.423	0.354	0	0	479.505	533.42	387.546	0	0	1287	21.45
1302	1.5	21.4667		0.279	1.5	0.282	1.5	0.236	0	0	0	0	0.4185	0.423	0.354	0	0	479.923	533.843	387.9	0	0	1288	21.4667
1303	1.5	21.4833		0.279	1.5	0.282	1.5	0.236	0	0	0	0	0.4185	0.423	0.354	0	0	480.342	534.266	388.254	0	0	1289	21.4833
1304	1.5	21.5		0.279	1.5	0.282	1.5	0.237	0	0	0	0	0.4185	0.423	0.3555	0	0	480.76	534.689	388.61	0	0	1290	21.5
1305	1.5	21.5167		0.279	1.5	0.282	1.5	0.237	0	0	0	0	0.4185	0.423	0.3555	0	0	481.179	535.112	388.965	0	0	1291	21.5167
1306	1.5	21.5333		0.279	1.5	0.282	1.5	0.237	0	0	0	0	0.4185	0.423	0.3555	0	0	481.597	535.535	389.321	0	0	1292	21.5333
1307	1.5	21.55		0.279	1.5	0.281	1.5	0.237	0	0	0	0	0.4185	0.4215	0.3555	0	0	482.016	535.956	389.676	0	0	1293	21.55
1308	1.5	21.5667		0.279	1.5	0.281	1.5	0.237	0	0	0	0	0.4185	0.4215	0.3555	0	0	482.434	536.378	390.032	0	0	1294	21.5667
1309	1.5	21.5833		0.279	1.5	0.28	1.5	0.22	0	0	0	0	0.4185	0.42	0.33	0	0	482.853	536.798	390.362	0	0	1295	21.5833
1310	1.5	21.6		0.279	1.5	0.28	1.5	0.235	0	0	0	0	0.4185	0.42	0.3525	0	0	483.271	537.218	390.714	0	0	1296	21.6
1311	1.5	21.6167		0.279	1.5	0.28	1.5	0.239	0	0	0	0	0.4185	0.42	0.3585	0	0	483.69	537.638	391.073	0	0	1297	21.6167
1312	1.5	21.6333		0.279	3.71	0.305	1.5	0.239	0	0	0	0	0.4185	1.13155	0.3585	0	0	484.108	538.77	391.431	0	0	1298	21.6333
1313	1.5	21.65		0.279	1.5	0.293	1.5	0.239	0	0	0	0	0.4185	0.4395	0.3585	0	0	484.527	539.209	391.79	0	0	1299	21.65
1314	1.5	21.6667		0.928	1.5	0.291	1.5	0.239	0	0	0	0	1.392	0.4365	0.3585	0	0	485.919	539.646	392.148	0	0	1300	21.6667
1315	1.5	21.6833		0.292	1.5	0.29	1.5	0.239	0	0	0	0	0.438	0.435	0.3585	0	0	486.357	540.081	392.507	0	0	1301	21.6833
1316	1.5	21.7		0.291	1.5	0.288	1.5	0.24	0	0	0	0	0.4365	0.432	0.36	0	0	486.793	540.513	392.867	0	0	1302	21.7
1317	1.5	21.7167		0.29	1.5	0.287	1.5	0.24	0	0	0	0	0.435	0.4305	0.36	0	0	487.228	540.943	393.227	0	0	1303	21.7167
1318	1.5	21.7333		0.288	1.5	0.286	1.5	0.24	0	0	0	0	0.432	0.429	0.36	0	0	487.66	541.372	393.587	0	0	1304	21.7333
1319	1.5	21.75		0.287	1.5	0.285	1.5	0.24	0	0	0	0	0.4305	0.4275	0.36	0	0	488.091	541.8	393.947	0	0	1305	21.75
1320	1.5	21.7667		0.286	1.5	0.284	1.5	0.24	0	0	0	0	0.429	0.426	0.36	0	0	488.52	542.226	394.307	0	0	1306	21.7667
1321	1.5	21.7833		0.285	1.5	0.283	1.5	0.24	0	0	0	0	0.4275	0.4245	0.36	0	0	488.947	542.65	394.667	0	0	1307	21.7833
1322	1.5	21.8		0.285	1.5	0.283	1.5	0.24	0	0	0	0	0.4275	0.4245	0.36	0	0	489.375	543.075	395.027	0	0	1308	21.8
1323	1.5	21.8167		0.284	1.5	0.283	1.5	0.24	0	0	0	0	0.426	0.4245	0.36	0	0	489.801	543.499	395.387	0	0	1309	21.8167
1324	1.5	21.8333		0.284	1.5	0.282	1.5	0.24	0	0	0	0	0.426	0.423	0.36	0	0	490.227	543.922	395.747	0	0	1310	21.8333
1325	1.5	21.85		0.283	1.5	0.282	1.5	0.241	0	0	0	0	0.4245	0.423	0.3615	0	0	490.651	544.345	396.108	0	0	1311	21.85
1326	1.5	21.8667		0.283	1.5	0.282	1.5	0.241	0	0	0	0	0.4245	0.423	0.3615	0	0	491.076	544.768	396.47	0	0	1312	21.8667
1327	1.5	21.8833		0.283	1.5	0.281	1.5	0.241	0	0	0	0	0.4245	0.4215	0.3615	0	0	491.5	545.19	396.831	0	0	1313	21.8833
1328	1.5	21.9		0.283	1.5	0.281	1.5	0.241	0	0	0	0	0.4245	0.4215	0.3615	0	0	491.925	545.611	397.193	0	0	1314	21.9
1329	1.5	21.9167		0.283	1.5	0.282	1.5	0.241	0	0	0	0	0.4245	0.423	0.3615	0	0	492.349	546.034	397.554	0	0	1315	21.9167
1330	1.5	21.9333		0.283	1.5	0.282	1.5	0.241	0	0	0	0	0.4245	0.423	0.3615	0	0	492.774	546.457	397.916	0	0	1316	21.9333
1331	1.5	21.95		0.282	1.5	0.282	1.5	0.241	0	0	0	0	0.423	0.423	0.3615	0	0	493.197	546.88	398.277	0	0	1317	21.95
1332	1.5	21.9667		0.282	1.5	0.282	1.5	0.241	0	0	0	0	0.423	0.423	0.3615	0	0	493.62	547.303	398.639	0	0	1318	21.9667
1333	1.5	21.9833		0.282	1.5	0.282	1.5	0.241	0	0	0	0	0.423	0.423	0.3615	0	0	494.043	547.726	399	0	0	1319	21.9833
1334	1.5	22		0.282	1.5	0.282	1.5	0.241	0	0	0	0	0.423	0.423	0.3615	0	0	494.466	548.149	399.362	0	0	1320	22
1335	1.5	22.0167		0.282	1.5	0.282	1.5	0.241	0	0	0	0	0.423	0.423	0.3615	0	0	494.889	548.572	399.723	0	0	1321	22.0167
1336	1.5	22.0333		0.282	1.5	0.282	1.5	0.241	0	0	0	0	0.423	0.423	0.3615	0	0	495.312	548.995	400.085	0	0	1322	22.0333
1337	1.5	22.05		0.281	1.5	0.283	1.5	0.241	0	0	0	0	0.4215	0.4245	0.3615	0	0	495.733	549.42	400.446	0	0	1323	22.05
1338	1.5	22.0667		0.281	1.5	0.283	1.5	0.241	0	0	0	0	0.4215	0.4245	0.3615	0	0	496.155	549.844	400.808	0	0	1324	22.0667
1339	1.5	22.0833		0.281	1.5	0.284	1.5	0.237	0	0	0	0	0.4215	0.426	0.3555	0	0	496.576	550.27	401.163	0	0	1325	22.0833
1340	1.5	22.1		0.281	1.5	0.284	1.5	0.232	0	0	0	0	0.4215	0.426	0.348	0	0	496.998	550.696	401.511	0	0	1326	22.1
1341	1.5	22.1167		0.281	1.5	0.284	1.5	0.229	0	0	0	0	0.4215	0.426	0.3435	0	0	497.419	551.122	401.855	0	0	1327	22.1167
1342	1.5	22.1333		0.282	1.5	0.301	1.5	0.227	0	0	0	0	0.423	0.4515	0.3405	0	0	497.842	551.574	402.195	0	0	1328	22.1333
1343	1.5	22.15		0.282	1.5	0.297	1.5	0.226	0	0	0	0	0.423	0.4455	0.339	0	0	498.265	552.019	402.534	0	0	1329	22.15
1344	1.5	22.1667		0.978	1.5	0.296	1.5	0.226	0	0	0	0	1.467	0.444	0.339	0	0	499.732	552.463	402.873	0	0	1330	22.1667
1345	1.5	22.1833		0.295	1.5	0.294	1.5	0.225	0	0	0	0	0.4425	0.441	0.3375	0	0	500.175	552.904	403.211	0	0	1331	22.1833
1346	1.5	22.2		0.293	1.5	0.293	1.5	0.225	0	0	0	0	0.4395	0.4395	0.3375	0	0	500.614	553.344	403.548	0	0	1332	22.2
1347	1.5	22.2167		0.292	1.5	0.292	1.5	0.225	0	0	0	0	0.438	0.438	0.3375	0	0	501.052	553.782	403.886	0	0	1333	22.2167
1348	1.5	22.2333		0.291	1.5	0.291	1.5	0.225	0	0	0	0	0.4365	0.4365	0.3375	0	0	501.489	554.218	404.223	0	0	1334	22.2333
1349	1.5	22.25		0.29	1.5	0.291	1.5	0.224	0	0	0	0	0.435	0.4365	0.336	0	0	501.924	554.655	404.559	0	0	1335	22.25
1350	1.5	22.2667		0.289	1.5	0.29	1.5	0.224	0	0	0	0	0.4335	0.435	0.336	0	0	502.357	555.09	404.895	0	0	1336	22.2667
1351	1.5	22.2833		0.288	1.5	0.29	1.5	0.224	0	0	0	0	0.432	0.435	0.336	0	0	502.789	555.525	405.231	0	0	1337	22.2833
1352	1.5	22.3		0.287	1.5	0.29	1.5	0.224	0	0	0	0	0.4305	0.435	0.336	0	0	503.22	555.96	405.567	0	0	1338	22.3
1353	1.5	22.3167		0.286	1.5	0.289	1.5	0.224	0	0	0	0	0.429	0.4335	0.336	0	0	503.649	556.393	405.903	0	0	1339	22.3167
1354	1.5	22.3333		0.286	1.5	0.289	1.5	0.223	0	0	0	0	0.429	0.4335	0.3345	0	0	504.078	556.827	406.238	0	0	1340	22.3333
1355	1.5	22.35		0.286	1.5	0.289	1.5	0.223	0	0	0	0	0.429	0.4335	0.3345	0	0	504.507	557.26	406.572	0	0	1341	22.35
1356	1.5	22.3667		0.285	1.5	0.289	1.5	0.223	0	0	0	0	0.4275	0.4335	0.3345	0	0	504.934	557.694	406.907	0	0	1342	22.3667
1357	1.5	22.3833		0.285	1.5	0.289	1.5	0.223	0	0	0	0	0.4275	0.4335	0.3345	0	0	505.362	558.127	407.241	0	0	1343	22.3833
1358	1.5	22.4		0.285	1.5	0.29	1.5	0.223	0	0	0	0	0.4275	0.435	0.3345	0	0	505.789	558.562	407.576	0	0	1344	22.4
1359	1.5	22.4167		0.285	1.5	0.29	1.5	0.223	0	0	0	0	0.4275	0.435	0.3345	0	0	506.217	558.997	407.91	0	0	1345	22.4167
1360	1.5	22.4333		0.284	1.5	0.29	1.5	0.223	0	0	0	0	0.426	0.435	0.3345	0	0	506.643	559.432	408.245	0	0	1346	22.4333
1361	1.5	22.45		0.284	1.5	0.29	1.5	0.223	0	0	0	0	0.426	0.435	0.3345	0	0	507.069	559.867	408.579	0	0	1347	22.45
1362	1.5	22.4667		0.284	1.5	0.29	1.5	0.222	0	0	0	0	0.426	0.435	0.333	0	0	507.495	560.302	408.912	0	0	1348	22.4667
1363	1.5	22.4833		0.284	1.5	0.29	1.5	0.222	0	0	0	0	0.426	0.435	0.333	0	0	507.921	560.737	409.245	0	0	1349	22.4833
1364	1.5	22.5		0.284	1.5	0.29	1.5	0.222	0	0	0	0	0.426	0.435	0.333	0	0	508.347	561.172	409.578	0	0	1350	22.5
1365	1.5	22.5167		0.283	1.5	0.291	1.5	0.222	0	0	0	0	0.4245	0.4365	0.333	0	0	508.771	561.609	409.911	0	0	1351	22.5167
1366	1.5	22.5333		0.284	1.5	0.29	1.5	0.222	0	0	0	0	0.426	0.435	0.333	0	0	509.197	562.044	410.244	0	0	1352	22.5333
1367	1.5	22.55		0.283	1.5	0.29	1.5	0.222	0	0	0	0	0.4245	0.435	0.333	0	0	509.622	562.479	410.577	0	0	1353	22.55
1368	1.5	22.5667		0.283	1.5	0.291	1.5	0.222	0	0	0	0	0.4245	0.4365	0.333	0	0	510.046	562.915	410.91	0	0	1354	22.5667
1369	1.5	22.5833		0.283	1.5	0.291	1.5	0.239	0	0	0	0	0.4245	0.4365	0.3585	0	0	510.471	563.352	411.269	0	0	1355	22.5833
1370	1.5	22.6		0.283	1.5	0.291	1.5	0.251	0	0	0	0	0.4245	0.4365	0.3765	0	0	510.895	563.788	411.645	0	0	1356	22.6
1371	1.5	22.6167		0.283	1.5	0.291	1.5	0.252	0	0	0	0	0.4245	0.4365	0.378	0	0	511.32	564.225	412.023	0	0	1357	22.6167
1372	1.5	22.6333		0.283	3.37	0.321	1.5	0.253	0	0	0	0	0.4245	1.08177	0.3795	0	0	511.744	565.306	412.403	0	0	1358	22.6333
1373	1.5	22.65		0.282	1.5	0.307	1.5	0.253	0	0	0	0	0.423	0.4605	0.3795	0	0	512.167	565.767	412.782	0	0	1359	22.65
1374	1.5	22.6667		1.02	1.5	0.306	1.5	0.254	0	0	0	0	1.53	0.459	0.381	0	0	513.697	566.226	413.163	0	0	1360	22.6667
1375	1.5	22.6833		0.294	1.5	0.305	1.5	0.254	0	0	0	0	0.441	0.4575	0.381	0	0	514.138	566.683	413.544	0	0	1361	22.6833
1376	1.5	22.7		0.292	1.5	0.304	1.5	0.254	0	0	0	0	0.438	0.456	0.381	0	0	514.576	567.139	413.925	0	0	1362	22.7
1377	1.5	22.7167		0.291	1.5	0.303	1.5	0.254	0	0	0	0	0.4365	0.4545	0.381	0	0	515.013	567.594	414.306	0	0	1363	22.7167
1378	1.5	22.7333		0.29	1.5	0.302	1.5	0.254	0	0	0	0	0.435	0.453	0.381	0	0	515.448	568.047	414.687	0	0	1364	22.7333
1379	1.5	22.75		0.289	1.5	0.301	1.5	0.254	0	0	0	0	0.4335	0.4515	0.381	0	0	515.881	568.498	415.068	0	0	1365	22.75
1380	1.5	22.7667		0.288	1.5	0.3	1.5	0.254	0	0	0	0	0.432	0.45	0.381	0	0	516.313	568.948	415.449	0	0	1366	22.7667
1381	1.5	22.7833		0.287	1.5	0.299	1.5	0.254	0	0	0	0	0.4305	0.4485	0.381	0	0	516.744	569.397	415.83	0	0	1367	22.7833
1382	1.5	22.8		0.286	1.5	0.298	1.5	0.254	0	0	0	0	0.429	0.447	0.381	0	0	517.173	569.844	416.211	0	0	1368	22.8
1383	1.5	22.8167		0.286	1.5	0.298	1.5	0.255	0	0	0	0	0.429	0.447	0.3825	0	0	517.602	570.291	416.594	0	0	1369	22.8167
1384	1.5	22.8333		0.286	1.5	0.293	1.5	0.255	0	0	0	0	0.429	0.4395	0.3825	0	0	518.031	570.73	416.976	0	0	1370	22.8333
1385	1.5	22.85		0.285	1.5	0.293	1.5	0.255	0	0	0	0	0.4275	0.4395	0.3825	0	0	518.458	571.17	417.359	0	0	1371	22.85
1386	1.5	22.8667		0.285	1.5	0.292	1.5	0.255	0	0	0	0	0.4275	0.438	0.3825	0	0	518.886	571.608	417.741	0	0	1372	22.8667
1387	1.5	22.8833		0.285	1.5	0.292	1.5	0.255	0	0	0	0	0.4275	0.438	0.3825	0	0	519.313	572.046	418.124	0	0	1373	22.8833
1388	1.5	22.9		0.285	1.5	0.291	1.5	0.255	0	0	0	0	0.4275	0.4365	0.3825	0	0	519.741	572.482	418.506	0	0	1374	22.9
1389	1.5	22.9167		0.285	1.5	0.291	1.5	0.255	0	0	0	0	0.4275	0.4365	0.3825	0	0	520.168	572.919	418.889	0	0	1375	22.9167
1390	1.5	22.9333		0.285	1.5	0.291	1.5	0.255	0	0	0	0	0.4275	0.4365	0.3825	0	0	520.596	573.355	419.271	0	0	1376	22.9333
1391	1.5	22.95		0.284	1.5	0.29	1.5	0.255	0	0	0	0	0.426	0.435	0.3825	0	0	521.022	573.79	419.654	0	0	1377	22.95
1392	1.5	22.9667		0.284	1.5	0.29	1.5	0.255	0	0	0	0	0.426	0.435	0.3825	0	0	521.448	574.225	420.036	0	0	1378	22.9667
1393	1.5	22.9833		0.284	1.5	0.29	1.5	0.255	0	0	0	0	0.426	0.435	0.3825	0	0	521.874	574.66	420.419	0	0	1379	22.9833
1394	1.5	23		0.284	1.5	0.29	1.5	0.255	0	0	0	0	0.426	0.435	0.3825	0	0	522.3	575.095	420.801	0	0	1380	23
1395	1.5	23.0167		0.284	1.5	0.29	1.5	0.255	0	0	0	0	0.426	0.435	0.3825	0	0	522.726	575.53	421.184	0	0	1381	23.0167
1396	1.5	23.0333		0.283	1.5	0.289	1.5	0.255	0	0	0	0	0.4245	0.4335	0.3825	0	0	523.15	575.964	421.566	0	0	1382	23.0333
1397	1.5	23.05		0.284	1.5	0.289	1.5	0.255	0	0	0	0	0.426	0.4335	0.3825	0	0	523.576	576.397	421.949	0	0	1383	23.05
1398	1.5	23.0667		0.283	1.5	0.289	1.5	0.255	0	0	0	0	0.4245	0.4335	0.3825	0	0	524.001	576.831	422.331	0	0	1384	23.0667
1399	1.5	23.0833		0.283	1.5	0.29	1.5	0.237	0	0	0	0	0.4245	0.435	0.3555	0	0	524.425	577.266	422.687	0	0	1385	23.0833
1400	1.5	23.1		0.283	1.5	0.29	1.5	0.232	0	0	0	0	0.4245	0.435	0.348	0	0	524.85	577.701	423.035	0	0	1386	23.1
1401	1.5	23.1167		0.283	1.5	0.29	1.5	0.23	0	0	0	0	0.4245	0.435	0.345	0	0	525.274	578.136	423.38	0	0	1387	23.1167
1402	1.5	23.1333		0.283	1.5	0.875	1.5	0.228	0	0	0	0	0.4245	1.3125	0.342	0	0	525.699	579.448	423.722	0	0	1388	23.1333
1403	1.5	23.15		0.283	1.5	0.301	1.5	0.227	0	0	0	0	0.4245	0.4515	0.3405	0	0	526.123	579.9	424.062	0	0	1389	23.15
1404	1.5	23.1667		1.008	1.5	0.3	1.5	0.226	0	0	0	0	1.512	0.45	0.339	0	0	527.635	580.35	424.401	0	0	1390	23.1667
1405	1.5	23.1833		0.295	1.5	0.299	1.5	0.226	0	0	0	0	0.4425	0.4485	0.339	0	0	528.078	580.798	424.74	0	0	1391	23.1833
1406	1.5	23.2		0.294	1.5	0.298	1.5	0.225	0	0	0	0	0.441	0.447	0.3375	0	0	528.519	581.245	425.078	0	0	1392	23.2
1407	1.5	23.2167		0.292	1.5	0.297	1.5	0.225	0	0	0	0	0.438	0.4455	0.3375	0	0	528.957	581.691	425.415	0	0	1393	23.2167
1408	1.5	23.2333		0.291	1.5	0.296	1.5	0.225	0	0	0	0	0.4365	0.444	0.3375	0	0	529.393	582.135	425.753	0	0	1394	23.2333
1409	1.5	23.25		0.289	1.5	0.295	1.5	0.225	0	0	0	0	0.4335	0.4425	0.3375	0	0	529.827	582.577	426.09	0	0	1395	23.25
1410	1.5	23.2667		0.288	1.5	0.294	1.5	0.225	0	0	0	0	0.432	0.441	0.3375	0	0	530.259	583.018	426.428	0	0	1396	23.2667
1411	1.5	23.2833		0.287	1.5	0.294	1.5	0.225	0	0	0	0	0.4305	0.441	0.3375	0	0	530.689	583.459	426.765	0	0	1397	23.2833
1412	1.5	23.3		0.286	1.5	0.294	1.5	0.224	0	0	0	0	0.429	0.441	0.336	0	0	531.118	583.9	427.101	0	0	1398	23.3
1413	1.5	23.3167		0.286	1.5	0.293	1.5	0.224	0	0	0	0	0.429	0.4395	0.336	0	0	531.547	584.34	427.437	0	0	1399	23.3167
1414	1.5	23.3333		0.285	1.5	0.293	1.5	0.224	0	0	0	0	0.4275	0.4395	0.336	0	0	531.975	584.779	427.773	0	0	1400	23.3333
1415	1.5	23.35		0.285	1.5	0.293	1.5	0.224	0	0	0	0	0.4275	0.4395	0.336	0	0	532.402	585.219	428.109	0	0	1401	23.35
1416	1.5	23.3667		0.285	1.5	0.292	1.5	0.224	0	0	0	0	0.4275	0.438	0.336	0	0	532.83	585.657	428.445	0	0	1402	23.3667
1417	1.5	23.3833		0.284	1.5	0.292	1.5	0.224	0	0	0	0	0.426	0.438	0.336	0	0	533.256	586.095	428.781	0	0	1403	23.3833
1418	1.5	23.4		0.284	1.5	0.292	1.5	0.224	0	0	0	0	0.426	0.438	0.336	0	0	533.682	586.533	429.117	0	0	1404	23.4
1419	1.5	23.4167		0.284	1.5	0.291	1.5	0.224	0	0	0	0	0.426	0.4365	0.336	0	0	534.108	586.969	429.453	0	0	1405	23.4167
1420	1.5	23.4333		0.284	1.5	0.291	1.5	0.224	0	0	0	0	0.426	0.4365	0.336	0	0	534.534	587.406	429.789	0	0	1406	23.4333
1421	1.5	23.45		0.283	1.5	0.291	1.5	0.224	0	0	0	0	0.4245	0.4365	0.336	0	0	534.958	587.842	430.125	0	0	1407	23.45
1422	1.5	23.4667		0.283	1.5	0.29	1.5	0.224	0	0	0	0	0.4245	0.435	0.336	0	0	535.383	588.277	430.461	0	0	1408	23.4667
1423	1.5	23.4833		0.283	1.5	0.29	1.5	0.224	0	0	0	0	0.4245	0.435	0.336	0	0	535.807	588.712	430.797	0	0	1409	23.4833
1424	1.5	23.5		0.284	1.5	0.29	1.5	0.224	0	0	0	0	0.426	0.435	0.336	0	0	536.233	589.147	431.133	0	0	1410	23.5
1425	1.5	23.5167		0.283	1.5	0.291	1.5	0.224	0	0	0	0	0.4245	0.4365	0.336	0	0	536.658	589.584	431.469	0	0	1411	23.5167
1426	1.5	23.5333		0.284	1.5	0.29	1.5	0.224	0	0	0	0	0.426	0.435	0.336	0	0	537.084	590.019	431.805	0	0	1412	23.5333
1427	1.5	23.55		0.284	1.5	0.29	1.5	0.224	0	0	0	0	0.426	0.435	0.336	0	0	537.51	590.454	432.141	0	0	1413	23.55
1428	1.5	23.5667		0.284	1.5	0.29	1.5	0.224	0	0	0	0	0.426	0.435	0.336	0	0	537.936	590.889	432.477	0	0	1414	23.5667
1429	1.5	23.5833		0.284	1.5	0.29	1.5	0.2	0	0	0	0	0.426	0.435	0.3	0	0	538.362	591.324	432.777	0	0	1415	23.5833
1430	1.5	23.6		0.284	1.5	0.29	1.5	0.237	0	0	0	0	0.426	0.435	0.3555	0	0	538.788	591.759	433.133	0	0	1416	23.6
1431	1.5	23.6167		0.284	1.5	0.289	1.5	0.235	0	0	0	0	0.426	0.4335	0.3525	0	0	539.214	592.192	433.485	0	0	1417	23.6167
1432	1.5	23.6333		0.284	3.07	0.325	1.5	0.237	0	0	0	0	0.426	0.99775	0.3555	0	0	539.64	593.19	433.841	0	0	1418	23.6333
1433	1.5	23.65		0.284	1.5	0.3	1.5	0.237	0	0	0	0	0.426	0.45	0.3555	0	0	540.066	593.64	434.196	0	0	1419	23.65
1434	1.5	23.6667		1	1.5	0.299	1.5	0.238	0	0	0	0	1.5	0.4485	0.357	0	0	541.566	594.089	434.553	0	0	1420	23.6667
1435	1.5	23.6833		0.295	1.5	0.298	1.5	0.238	0	0	0	0	0.4425	0.447	0.357	0	0	542.008	594.536	434.91	0	0	1421	23.6833
1436	1.5	23.7		0.295	1.5	0.296	1.5	0.239	0	0	0	0	0.4425	0.444	0.3585	0	0	542.451	594.98	435.269	0	0	1422	23.7
1437	1.5	23.7167		0.292	1.5	0.295	1.5	0.239	0	0	0	0	0.438	0.4425	0.3585	0	0	542.889	595.422	435.627	0	0	1423	23.7167
1438	1.5	23.7333		0.291	1.5	0.294	1.5	0.239	0	0	0	0	0.4365	0.441	0.3585	0	0	543.325	595.863	435.986	0	0	1424	23.7333
1439	1.5	23.75		0.29	1.5	0.294	1.5	0.239	0	0	0	0	0.435	0.441	0.3585	0	0	543.76	596.304	436.344	0	0	1425	23.75
1440	1.5	23.7667		0.289	1.5	0.294	1.5	0.239	0	0	0	0	0.4335	0.441	0.3585	0	0	544.194	596.745	436.703	0	0	1426	23.7667
1441	1.5	23.7833		0.288	1.5	0.293	1.5	0.239	0	0	0	0	0.432	0.4395	0.3585	0	0	544.626	597.185	437.061	0	0	1427	23.7833
1442	1.5	23.8		0.287	1.5	0.293	1.5	0.24	0	0	0	0	0.4305	0.4395	0.36	0	0	545.056	597.624	437.421	0	0	1428	23.8
1443	1.5	23.8167		0.287	1.5	0.292	1.5	0.24	0	0	0	0	0.4305	0.438	0.36	0	0	545.487	598.062	437.781	0	0	1429	23.8167
1444	1.5	23.8333		0.287	1.5	0.293	1.5	0.24	0	0	0	0	0.4305	0.4395	0.36	0	0	545.917	598.502	438.141	0	0	1430	23.8333
1445	1.5	23.85		0.286	1.5	0.293	1.5	0.24	0	0	0	0	0.429	0.4395	0.36	0	0	546.346	598.941	438.501	0	0	1431	23.85
1446	1.5	23.8667		0.286	1.5	0.292	1.5	0.24	0	0	0	0	0.429	0.438	0.36	0	0	546.775	599.379	438.861	0	0	1432	23.8667
1447	1.5	23.8833		0.286	1.5	0.292	1.5	0.24	0	0	0	0	0.429	0.438	0.36	0	0	547.204	599.817	439.221	0	0	1433	23.8833
1448	1.5	23.9		0.286	1.5	0.292	1.5	0.24	0	0	0	0	0.429	0.438	0.36	0	0	547.633	600.255	439.581	0	0	1434	23.9
1449	1.5	23.9167		0.285	1.5	0.293	1.5	0.24	0	0	0	0	0.4275	0.4395	0.36	0	0	548.061	600.695	439.941	0	0	1435	23.9167
1450	1.5	23.9333		0.285	1.5	0.293	1.5	0.24	0	0	0	0	0.4275	0.4395	0.36	0	0	548.488	601.134	440.301	0	0	1436	23.9333
1451	1.5	23.95		0.285	1.5	0.293	1.5	0.24	0	0	0	0	0.4275	0.4395	0.36	0	0	548.916	601.574	440.661	0	0	1437	23.95
1452	1.5	23.9667		0.285	1.5	0.293	1.5	0.241	0	0	0	0	0.4275	0.4395	0.3615	0	0	549.343	602.013	441.023	0	0	1438	23.9667
1453	1.5	23.9833		0.285	1.5	0.292	1.5	0.241	0	0	0	0	0.4275	0.438	0.3615	0	0	549.771	602.451	441.384	0	0	1439	23.9833
1454	1.5	24		0.285	1.5	0.292	1.5	0.241	0	0	0	0	0.4275	0.438	0.3615	0	0	550.198	602.889	441.746	0	0	1440	24
1455	1.5	24.0167		0.285	1.5	0.292	1.5	0.241	0	0	0	0	0.4275	0.438	0.3615	0	0	550.626	603.327	442.107	0	0	1441	24.0167
1456	1.5	24.0333		0.284	1.5	0.292	1.5	0.241	0	0	0	0	0.426	0.438	0.3615	0	0	551.052	603.765	442.469	0	0	1442	24.0333
1457	1.5	24.05		0.285	1.5	0.292	1.5	0.241	0	0	0	0	0.4275	0.438	0.3615	0	0	551.479	604.203	442.83	0	0	1443	24.05
1458	1.5	24.0667		0.284	1.5	0.293	1.5	0.241	0	0	0	0	0.426	0.4395	0.3615	0	0	551.905	604.643	443.192	0	0	1444	24.0667
1459	1.5	24.0833		0.284	1.5	0.293	1.5	0.25	0	0	0	0	0.426	0.4395	0.375	0	0	552.331	605.082	443.567	0	0	1445	24.0833
1460	1.5	24.1		0.284	1.5	0.293	1.5	0.247	0	0	0	0	0.426	0.4395	0.3705	0	0	552.757	605.522	443.937	0	0	1446	24.1
1461	1.5	24.1167		0.284	1.5	0.293	1.5	0.245	0	0	0	0	0.426	0.4395	0.3675	0	0	553.183	605.961	444.305	0	0	1447	24.1167
1462	1.5	24.1333		0.284	1.5	0.77	1.5	0.243	0	0	0	0	0.426	1.155	0.3645	0	0	553.609	607.116	444.669	0	0	1448	24.1333
1463	1.5	24.15		0.284	1.5	0.302	1.5	0.242	0	0	0	0	0.426	0.453	0.363	0	0	554.035	607.569	445.032	0	0	1449	24.15
1464	1.5	24.1667		1	1.5	0.301	1.5	0.242	0	0	0	0	1.5	0.4515	0.363	0	0	555.535	608.021	445.395	0	0	1450	24.1667
1465	1.5	24.1833		0.295	1.5	0.299	1.5	0.242	0	0	0	0	0.4425	0.4485	0.363	0	0	555.978	608.469	445.758	0	0	1451	24.1833
1466	1.5	24.2		0.294	1.5	0.298	1.5	0.242	0	0	0	0	0.441	0.447	0.363	0	0	556.419	608.916	446.121	0	0	1452	24.2
1467	1.5	24.2167		0.292	1.5	0.297	1.5	0.241	0	0	0	0	0.438	0.4455	0.3615	0	0	556.857	609.362	446.483	0	0	1453	24.2167
1468	1.5	24.2333		0.291	1.5	0.296	1.5	0.241	0	0	0	0	0.4365	0.444	0.3615	0	0	557.293	609.806	446.844	0	0	1454	24.2333
1469	1.5	24.25		0.29	1.5	0.295	1.5	0.241	0	0	0	0	0.435	0.4425	0.3615	0	0	557.728	610.248	447.206	0	0	1455	24.25
1470	1.5	24.2667		0.289	1.5	0.295	1.5	0.241	0	0	0	0	0.4335	0.4425	0.3615	0	0	558.162	610.691	447.567	0	0	1456	24.2667
1471	1.5	24.2833		0.288	1.5	0.294	1.5	0.241	0	0	0	0	0.432	0.441	0.3615	0	0	558.594	611.132	447.929	0	0	1457	24.2833
1472	1.5	24.3		0.287	1.5	0.294	1.5	0.241	0	0	0	0	0.4305	0.441	0.3615	0	0	559.024	611.573	448.29	0	0	1458	24.3
1473	1.5	24.3167		0.287	1.5	0.293	1.5	0.241	0	0	0	0	0.4305	0.4395	0.3615	0	0	559.455	612.012	448.652	0	0	1459	24.3167
1474	1.5	24.3333		0.286	1.5	0.293	1.5	0.241	0	0	0	0	0.429	0.4395	0.3615	0	0	559.884	612.452	449.013	0	0	1460	24.3333
1475	1.5	24.35		0.286	1.5	0.293	1.5	0.241	0	0	0	0	0.429	0.4395	0.3615	0	0	560.313	612.891	449.375	0	0	1461	24.35
1476	1.5	24.3667		0.286	1.5	0.293	1.5	0.241	0	0	0	0	0.429	0.4395	0.3615	0	0	560.742	613.331	449.736	0	0	1462	24.3667
1477	1.5	24.3833		0.286	1.5	0.293	1.5	0.241	0	0	0	0	0.429	0.4395	0.3615	0	0	561.171	613.77	450.098	0	0	1463	24.3833
1478	1.5	24.4		0.286	1.5	0.293	1.5	0.241	0	0	0	0	0.429	0.4395	0.3615	0	0	561.6	614.21	450.459	0	0	1464	24.4
1479	1.5	24.4167		0.285	1.5	0.292	1.5	0.241	0	0	0	0	0.4275	0.438	0.3615	0	0	562.027	614.648	450.821	0	0	1465	24.4167
1480	1.5	24.4333		0.285	1.5	0.292	1.5	0.241	0	0	0	0	0.4275	0.438	0.3615	0	0	562.455	615.086	451.182	0	0	1466	24.4333
1481	1.5	24.45		0.285	1.5	0.291	1.5	0.241	0	0	0	0	0.4275	0.4365	0.3615	0	0	562.882	615.522	451.544	0	0	1467	24.45
1482	1.5	24.4667		0.285	1.5	0.291	1.5	0.241	0	0	0	0	0.4275	0.4365	0.3615	0	0	563.31	615.959	451.905	0	0	1468	24.4667
1483	1.5	24.4833		0.285	1.5	0.291	1.5	0.241	0	0	0	0	0.4275	0.4365	0.3615	0	0	563.737	616.395	452.267	0	0	1469	24.4833
1484	1.5	24.5		0.285	1.5	0.291	1.5	0.241	0	0	0	0	0.4275	0.4365	0.3615	0	0	564.165	616.832	452.628	0	0	1470	24.5
1485	1.5	24.5167		0.285	1.5	0.291	1.5	0.241	0	0	0	0	0.4275	0.4365	0.3615	0	0	564.592	617.268	452.99	0	0	1471	24.5167
1486	1.5	24.5333		0.285	1.5	0.29	1.5	0.241	0	0	0	0	0.4275	0.435	0.3615	0	0	565.02	617.703	453.351	0	0	1472	24.5333
1487	1.5	24.55		0.285	1.5	0.29	1.5	0.241	0	0	0	0	0.4275	0.435	0.3615	0	0	565.447	618.138	453.713	0	0	1473	24.55
1488	1.5	24.5667		0.284	1.5	0.29	1.5	0.241	0	0	0	0	0.426	0.435	0.3615	0	0	565.873	618.573	454.074	0	0	1474	24.5667
1489	1.5	24.5833		0.285	1.5	0.29	1.5	0.248	0	0	0	0	0.4275	0.435	0.372	0	0	566.301	619.008	454.446	0	0	1475	24.5833
1490	1.5	24.6		0.285	1.5	0.29	1.5	0.245	0	0	0	0	0.4275	0.435	0.3675	0	0	566.728	619.443	454.814	0	0	1476	24.6
1491	1.5	24.6167		0.284	1.5	0.29	1.5	0.243	0	0	0	0	0.426	0.435	0.3645	0	0	567.154	619.878	455.178	0	0	1477	24.6167
1492	1.5	24.6333		0.284	2.75	0.405	1.5	0.242	0	0	0	0	0.426	1.11375	0.363	0	0	567.58	620.992	455.541	0	0	1478	24.6333
1493	1.5	24.65		0.284	1.5	0.302	1.5	0.241	0	0	0	0	0.426	0.453	0.3615	0	0	568.006	621.445	455.903	0	0	1479	24.65
1494	1.5	24.6667		1	1.5	0.301	1.5	0.24	0	0	0	0	1.5	0.4515	0.36	0	0	569.506	621.896	456.263	0	0	1480	24.6667
1495	1.5	24.6833		0.296	1.5	0.3	1.5	0.24	0	0	0	0	0.444	0.45	0.36	0	0	569.95	622.346	456.623	0	0	1481	24.6833
1496	1.5	24.7		0.295	1.5	0.298	1.5	0.239	0	0	0	0	0.4425	0.447	0.3585	0	0	570.393	622.793	456.981	0	0	1482	24.7
1497	1.5	24.7167		0.294	1.5	0.297	1.5	0.239	0	0	0	0	0.441	0.4455	0.3585	0	0	570.834	623.239	457.34	0	0	1483	24.7167
1498	1.5	24.7333		0.292	1.5	0.297	1.5	0.239	0	0	0	0	0.438	0.4455	0.3585	0	0	571.272	623.684	457.698	0	0	1484	24.7333
1499	1.5	24.75		0.291	1.5	0.297	1.5	0.239	0	0	0	0	0.4365	0.4455	0.3585	0	0	571.708	624.13	458.057	0	0	1485	24.75
1500	1.5	24.7667		0.29	1.5	0.297	1.5	0.239	0	0	0	0	0.435	0.4455	0.3585	0	0	572.143	624.575	458.415	0	0	1486	24.7667
1501	1.5	24.7833		0.289	1.5	0.297	1.5	0.239	0	0	0	0	0.4335	0.4455	0.3585	0	0	572.577	625.021	458.774	0	0	1487	24.7833
1502	1.5	24.8		0.288	1.5	0.291	1.5	0.239	0	0	0	0	0.432	0.4365	0.3585	0	0	573.009	625.457	459.132	0	0	1488	24.8
1503	1.5	24.8167		0.288	1.5	0.291	1.5	0.239	0	0	0	0	0.432	0.4365	0.3585	0	0	573.441	625.894	459.491	0	0	1489	24.8167
1504	1.5	24.8333		0.288	1.5	0.291	1.5	0.239	0	0	0	0	0.432	0.4365	0.3585	0	0	573.873	626.33	459.849	0	0	1490	24.8333
1505	1.5	24.85		0.287	1.5	0.291	1.5	0.238	0	0	0	0	0.4305	0.4365	0.357	0	0	574.303	626.767	460.206	0	0	1491	24.85
1506	1.5	24.8667		0.287	1.5	0.291	1.5	0.238	0	0	0	0	0.4305	0.4365	0.357	0	0	574.734	627.203	460.563	0	0	1492	24.8667
1507	1.5	24.8833		0.287	1.5	0.291	1.5	0.238	0	0	0	0	0.4305	0.4365	0.357	0	0	575.164	627.64	460.92	0	0	1493	24.8833
1508	1.5	24.9		0.287	1.5	0.29	1.5	0.238	0	0	0	0	0.4305	0.435	0.357	0	0	575.595	628.075	461.277	0	0	1494	24.9
1509	1.5	24.9167		0.286	1.5	0.291	1.5	0.238	0	0	0	0	0.429	0.4365	0.357	0	0	576.024	628.511	461.634	0	0	1495	24.9167
1510	1.5	24.9333		0.287	1.5	0.291	1.5	0.238	0	0	0	0	0.4305	0.4365	0.357	0	0	576.454	628.948	461.991	0	0	1496	24.9333
1511	1.5	24.95		0.287	1.5	0.291	1.5	0.238	0	0	0	0	0.4305	0.4365	0.357	0	0	576.885	629.384	462.348	0	0	1497	24.95
1512	1.5	24.9667		0.286	1.5	0.291	1.5	0.238	0	0	0	0	0.429	0.4365	0.357	0	0	577.314	629.821	462.705	0	0	1498	24.9667
1513	1.5	24.9833		0.286	1.5	0.29	1.5	0.238	0	0	0	0	0.429	0.435	0.357	0	0	577.743	630.256	463.062	0	0	1499	24.9833
1514	1.5	25		0.286	1.5	0.29	1.5	0.238	0	0	0	0	0.429	0.435	0.357	0	0	578.172	630.691	463.419	0	0	1500	25
1515	1.5	25.0167		0.286	1.5	0.29	1.5	0.237	0	0	0	0	0.429	0.435	0.3555	0	0	578.601	631.126	463.775	0	0	1501	25.0167
1516	1.5	25.0333		0.286	1.5	0.29	1.5	0.238	0	0	0	0	0.429	0.435	0.357	0	0	579.03	631.561	464.132	0	0	1502	25.0333
1517	1.5	25.05		0.286	1.5	0.29	1.5	0.238	0	0	0	0	0.429	0.435	0.357	0	0	579.459	631.996	464.489	0	0	1503	25.05
1518	1.5	25.0667		0.286	1.5	0.29	1.5	0.238	0	0	0	0	0.429	0.435	0.357	0	0	579.888	632.431	464.846	0	0	1504	25.0667
1519	1.5	25.0833		0.286	1.5	0.29	1.5	0.246	0	0	0	0	0.429	0.435	0.369	0	0	580.317	632.866	465.215	0	0	1505	25.0833
1520	1.5	25.1		0.286	1.5	0.289	1.5	0.243	0	0	0	0	0.429	0.4335	0.3645	0	0	580.746	633.299	465.579	0	0	1506	25.1
1521	1.5	25.1167		0.286	1.5	0.289	1.5	0.241	0	0	0	0	0.429	0.4335	0.3615	0	0	581.175	633.733	465.941	0	0	1507	25.1167
1522	1.5	25.1333		0.286	1.84	0.308	1.5	0.24	0	0	0	0	0.429	0.56672	0.36	0	0	581.604	634.3	466.301	0	0	1508	25.1333
1523	1.5	25.15		0.285	1.5	0.303	1.5	0.239	0	0	0	0	0.4275	0.4545	0.3585	0	0	582.031	634.754	466.659	0	0	1509	25.15
1524	1.5	25.1667		1	1.5	0.302	1.5	0.239	0	0	0	0	1.5	0.453	0.3585	0	0	583.531	635.207	467.018	0	0	1510	25.1667
1525	1.5	25.1833		0.296	1.5	0.301	1.5	0.238	0	0	0	0	0.444	0.4515	0.357	0	0	583.975	635.659	467.375	0	0	1511	25.1833
1526	1.5	25.2		0.295	1.5	0.3	1.5	0.238	0	0	0	0	0.4425	0.45	0.357	0	0	584.418	636.109	467.732	0	0	1512	25.2
1527	1.5	25.2167		0.294	1.5	0.298	1.5	0.238	0	0	0	0	0.441	0.447	0.357	0	0	584.859	636.556	468.089	0	0	1513	25.2167
1528	1.5	25.2333		0.292	1.5	0.298	1.5	0.238	0	0	0	0	0.438	0.447	0.357	0	0	585.297	637.003	468.446	0	0	1514	25.2333
1529	1.5	25.25		0.291	1.5	0.297	1.5	0.238	0	0	0	0	0.4365	0.4455	0.357	0	0	585.733	637.448	468.803	0	0	1515	25.25
1530	1.5	25.2667		0.29	1.5	0.296	1.5	0.238	0	0	0	0	0.435	0.444	0.357	0	0	586.168	637.892	469.16	0	0	1516	25.2667
1531	1.5	25.2833		0.29	1.5	0.296	1.5	0.238	0	0	0	0	0.435	0.444	0.357	0	0	586.603	638.336	469.517	0	0	1517	25.2833
1532	1.5	25.3		0.289	1.5	0.296	1.5	0.238	0	0	0	0	0.4335	0.444	0.357	0	0	587.037	638.78	469.874	0	0	1518	25.3
1533	1.5	25.3167		0.289	1.5	0.297	1.5	0.238	0	0	0	0	0.4335	0.4455	0.357	0	0	587.47	639.226	470.231	0	0	1519	25.3167
1534	1.5	25.3333		0.288	1.5	0.296	1.5	0.238	0	0	0	0	0.432	0.444	0.357	0	0	587.902	639.67	470.588	0	0	1520	25.3333
1535	1.5	25.35		0.288	1.5	0.296	1.5	0.238	0	0	0	0	0.432	0.444	0.357	0	0	588.334	640.114	470.945	0	0	1521	25.35
1536	1.5	25.3667		0.287	1.5	0.296	1.5	0.238	0	0	0	0	0.4305	0.444	0.357	0	0	588.765	640.558	471.302	0	0	1522	25.3667
1537	1.5	25.3833		0.287	1.5	0.296	1.5	0.238	0	0	0	0	0.4305	0.444	0.357	0	0	589.195	641.002	471.659	0	0	1523	25.3833
1538	1.5	25.4		0.287	1.5	0.296	1.5	0.237	0	0	0	0	0.4305	0.444	0.3555	0	0	589.626	641.446	472.014	0	0	1524	25.4
1539	1.5	25.4167		0.286	1.5	0.296	1.5	0.237	0	0	0	0	0.429	0.444	0.3555	0	0	590.055	641.89	472.37	0	0	1525	25.4167
1540	1.5	25.4333		0.287	1.5	0.296	1.5	0.237	0	0	0	0	0.4305	0.444	0.3555	0	0	590.485	642.334	472.725	0	0	1526	25.4333
1541	1.5	25.45		0.287	1.5	0.295	1.5	0.237	0	0	0	0	0.4305	0.4425	0.3555	0	0	590.916	642.776	473.081	0	0	1527	25.45
1542	1.5	25.4667		0.286	1.5	0.295	1.5	0.238	0	0	0	0	0.429	0.4425	0.357	0	0	591.345	643.219	473.438	0	0	1528	25.4667
1543	1.5	25.4833		0.287	1.5	0.295	1.5	0.238	0	0	0	0	0.4305	0.4425	0.357	0	0	591.775	643.661	473.795	0	0	1529	25.4833
1544	1.5	25.5		0.287	1.5	0.295	1.5	0.238	0	0	0	0	0.4305	0.4425	0.357	0	0	592.206	644.104	474.152	0	0	1530	25.5
1545	1.5	25.5167		0.286	1.5	0.295	1.5	0.237	0	0	0	0	0.429	0.4425	0.3555	0	0	592.635	644.546	474.507	0	0	1531	25.5167
1546	1.5	25.5333		0.286	1.5	0.295	1.5	0.237	0	0	0	0	0.429	0.4425	0.3555	0	0	593.064	644.989	474.863	0	0	1532	25.5333
1547	1.5	25.55		0.286	1.5	0.294	1.5	0.237	0	0	0	0	0.429	0.441	0.3555	0	0	593.493	645.43	475.218	0	0	1533	25.55
1548	1.5	25.5667		0.286	1.5	0.294	1.5	0.237	0	0	0	0	0.429	0.441	0.3555	0	0	593.922	645.871	475.574	0	0	1534	25.5667
1549	1.5	25.5833		0.286	1.5	0.294	1.5	0.249	0	0	0	0	0.429	0.441	0.3735	0	0	594.351	646.312	475.947	0	0	1535	25.5833
1550	1.5	25.6		0.286	1.5	0.293	1.5	0.247	0	0	0	0	0.429	0.4395	0.3705	0	0	594.78	646.751	476.318	0	0	1536	25.6
1551	1.5	25.6167		0.286	1.5	0.293	1.5	0.244	0	0	0	0	0.429	0.4395	0.366	0	0	595.209	647.191	476.684	0	0	1537	25.6167
1552	1.5	25.6333		0.286	2.43	0.513	1.5	0.243	0	0	0	0	0.429	1.24659	0.3645	0	0	595.638	648.437	477.048	0	0	1538	25.6333
1553	1.5	25.65		0.286	1.5	0.301	1.5	0.243	0	0	0	0	0.429	0.4515	0.3645	0	0	596.067	648.889	477.413	0	0	1539	25.65
1554	1.5	25.6667		0.286	1.5	0.3	1.5	0.242	0	0	0	0	0.429	0.45	0.363	0	0	596.496	649.339	477.776	0	0	1540	25.6667
1555	1.5	25.6833		0.296	1.5	0.298	1.5	0.242	0	0	0	0	0.444	0.447	0.363	0	0	596.94	649.786	478.139	0	0	1541	25.6833
1556	1.5	25.7		0.295	1.5	0.297	1.5	0.242	0	0	0	0	0.4425	0.4455	0.363	0	0	597.382	650.231	478.502	0	0	1542	25.7
1557	1.5	25.7167		0.294	1.5	0.296	1.5	0.242	0	0	0	0	0.441	0.444	0.363	0	0	597.823	650.675	478.865	0	0	1543	25.7167
1558	1.5	25.7333		0.293	1.5	0.295	1.5	0.241	0	0	0	0	0.4395	0.4425	0.3615	0	0	598.263	651.118	479.226	0	0	1544	25.7333
1559	1.5	25.75		0.292	1.5	0.294	1.5	0.241	0	0	0	0	0.438	0.441	0.3615	0	0	598.701	651.559	479.588	0	0	1545	25.75
1560	1.5	25.7667		0.291	1.5	0.293	1.5	0.241	0	0	0	0	0.4365	0.4395	0.3615	0	0	599.137	651.998	479.949	0	0	1546	25.7667
1561	1.5	25.7833		0.29	1.5	0.292	1.5	0.241	0	0	0	0	0.435	0.438	0.3615	0	0	599.572	652.436	480.311	0	0	1547	25.7833
1562	1.5	25.8		0.289	1.5	0.292	1.5	0.241	0	0	0	0	0.4335	0.438	0.3615	0	0	600.006	652.874	480.672	0	0	1548	25.8
1563	1.5	25.8167		0.289	1.5	0.291	1.5	0.241	0	0	0	0	0.4335	0.4365	0.3615	0	0	600.439	653.311	481.034	0	0	1549	25.8167
1564	1.5	25.8333		0.288	1.5	0.291	1.5	0.241	0	0	0	0	0.432	0.4365	0.3615	0	0	600.871	653.747	481.395	0	0	1550	25.8333
1565	1.5	25.85		0.288	1.5	0.291	1.5	0.241	0	0	0	0	0.432	0.4365	0.3615	0	0	601.303	654.184	481.757	0	0	1551	25.85
1566	1.5	25.8667		0.288	1.5	0.29	1.5	0.241	0	0	0	0	0.432	0.435	0.3615	0	0	601.735	654.619	482.118	0	0	1552	25.8667
1567	1.5	25.8833		0.288	1.5	0.29	1.5	0.241	0	0	0	0	0.432	0.435	0.3615	0	0	602.167	655.054	482.48	0	0	1553	25.8833
1568	1.5	25.9		0.288	1.5	0.29	1.5	0.241	0	0	0	0	0.432	0.435	0.3615	0	0	602.599	655.489	482.841	0	0	1554	25.9
1569	1.5	25.9167		0.288	1.5	0.289	1.5	0.241	0	0	0	0	0.432	0.4335	0.3615	0	0	603.031	655.922	483.203	0	0	1555	25.9167
1570	1.5	25.9333		0.288	1.5	0.29	1.5	0.241	0	0	0	0	0.432	0.435	0.3615	0	0	603.463	656.357	483.564	0	0	1556	25.9333
1571	1.5	25.95		0.288	1.5	0.29	1.5	0.241	0	0	0	0	0.432	0.435	0.3615	0	0	603.895	656.792	483.926	0	0	1557	25.95
1572	1.5	25.9667		0.288	1.5	0.29	1.5	0.241	0	0	0	0	0.432	0.435	0.3615	0	0	604.327	657.227	484.287	0	0	1558	25.9667
1573	1.5	25.9833		0.287	1.5	0.29	1.5	0.241	0	0	0	0	0.4305	0.435	0.3615	0	0	604.758	657.662	484.649	0	0	1559	25.9833
1574	1.5	26		0.287	1.5	0.289	1.5	0.241	0	0	0	0	0.4305	0.4335	0.3615	0	0	605.188	658.096	485.01	0	0	1560	26
1575	1.5	26.0167		0.287	1.5	0.29	1.5	0.242	0	0	0	0	0.4305	0.435	0.363	0	0	605.619	658.531	485.373	0	0	1561	26.0167
1576	1.5	26.0333		0.287	1.5	0.29	1.5	0.242	0	0	0	0	0.4305	0.435	0.363	0	0	606.049	658.966	485.736	0	0	1562	26.0333
1577	1.5	26.05		0.287	1.5	0.29	1.5	0.242	0	0	0	0	0.4305	0.435	0.363	0	0	606.48	659.401	486.099	0	0	1563	26.05
1578	1.5	26.0667		0.287	1.5	0.29	1.5	0.241	0	0	0	0	0.4305	0.435	0.3615	0	0	606.91	659.836	486.461	0	0	1564	26.0667
1579	1.5	26.0833		0.287	1.5	0.29	1.5	0.247	0	0	0	0	0.4305	0.435	0.3705	0	0	607.341	660.271	486.831	0	0	1565	26.0833
1580	1.5	26.1		0.287	1.5	0.29	1.5	0.245	0	0	0	0	0.4305	0.435	0.3675	0	0	607.771	660.706	487.199	0	0	1566	26.1
1581	1.5	26.1167		0.287	1.5	0.29	1.5	0.243	0	0	0	0	0.4305	0.435	0.3645	0	0	608.202	661.141	487.563	0	0	1567	26.1167
1582	1.5	26.1333		0.287	2.15	0.308	1.5	0.241	0	0	0	0	0.4305	0.6622	0.3615	0	0	608.632	661.803	487.925	0	0	1568	26.1333
1583	1.5	26.15		0.287	1.5	0.303	1.5	0.241	0	0	0	0	0.4305	0.4545	0.3615	0	0	609.063	662.257	488.286	0	0	1569	26.15
1584	1.5	26.1667		0.287	1.5	0.302	1.5	0.24	0	0	0	0	0.4305	0.453	0.36	0	0	609.493	662.71	488.646	0	0	1570	26.1667
1585	1.5	26.1833		0.297	1.5	0.301	1.5	0.24	0	0	0	0	0.4455	0.4515	0.36	0	0	609.939	663.162	489.006	0	0	1571	26.1833
1586	1.5	26.2		0.296	1.5	0.3	1.5	0.24	0	0	0	0	0.444	0.45	0.36	0	0	610.383	663.612	489.366	0	0	1572	26.2
1587	1.5	26.2167		0.295	1.5	0.298	1.5	0.239	0	0	0	0	0.4425	0.447	0.3585	0	0	610.825	664.059	489.725	0	0	1573	26.2167
1588	1.5	26.2333		0.294	1.5	0.297	1.5	0.239	0	0	0	0	0.441	0.4455	0.3585	0	0	611.266	664.504	490.083	0	0	1574	26.2333
1589	1.5	26.25		0.292	1.5	0.297	1.5	0.239	0	0	0	0	0.438	0.4455	0.3585	0	0	611.704	664.95	490.442	0	0	1575	26.25
1590	1.5	26.2667		0.292	1.5	0.297	1.5	0.239	0	0	0	0	0.438	0.4455	0.3585	0	0	612.142	665.395	490.8	0	0	1576	26.2667
1591	1.5	26.2833		0.291	1.5	0.296	1.5	0.239	0	0	0	0	0.4365	0.444	0.3585	0	0	612.579	665.839	491.159	0	0	1577	26.2833
1592	1.5	26.3		0.291	1.5	0.296	1.5	0.239	0	0	0	0	0.4365	0.444	0.3585	0	0	613.015	666.283	491.517	0	0	1578	26.3
1593	1.5	26.3167		0.29	1.5	0.296	1.5	0.239	0	0	0	0	0.435	0.444	0.3585	0	0	613.45	666.727	491.876	0	0	1579	26.3167
1594	1.5	26.3333		0.29	1.5	0.296	1.5	0.239	0	0	0	0	0.435	0.444	0.3585	0	0	613.885	667.171	492.234	0	0	1580	26.3333
1595	1.5	26.35		0.29	1.5	0.296	1.5	0.239	0	0	0	0	0.435	0.444	0.3585	0	0	614.32	667.615	492.593	0	0	1581	26.35
1596	1.5	26.3667		0.29	1.5	0.296	1.5	0.239	0	0	0	0	0.435	0.444	0.3585	0	0	614.755	668.059	492.951	0	0	1582	26.3667
1597	1.5	26.3833		0.29	1.5	0.297	1.5	0.239	0	0	0	0	0.435	0.4455	0.3585	0	0	615.19	668.505	493.31	0	0	1583	26.3833
1598	1.5	26.4		0.289	1.5	0.297	1.5	0.239	0	0	0	0	0.4335	0.4455	0.3585	0	0	615.624	668.95	493.668	0	0	1584	26.4
1599	1.5	26.4167		0.289	1.5	0.296	1.5	0.239	0	0	0	0	0.4335	0.444	0.3585	0	0	616.057	669.394	494.027	0	0	1585	26.4167
1600	1.5	26.4333		0.289	1.5	0.296	1.5	0.239	0	0	0	0	0.4335	0.444	0.3585	0	0	616.491	669.838	494.385	0	0	1586	26.4333
1601	1.5	26.45		0.29	1.5	0.296	1.5	0.239	0	0	0	0	0.435	0.444	0.3585	0	0	616.926	670.282	494.744	0	0	1587	26.45
1602	1.5	26.4667		0.29	1.5	0.296	1.5	0.239	0	0	0	0	0.435	0.444	0.3585	0	0	617.361	670.726	495.102	0	0	1588	26.4667
1603	1.5	26.4833		0.289	1.5	0.296	1.5	0.239	0	0	0	0	0.4335	0.444	0.3585	0	0	617.794	671.17	495.461	0	0	1589	26.4833
1604	1.5	26.5		0.289	1.5	0.296	1.5	0.239	0	0	0	0	0.4335	0.444	0.3585	0	0	618.228	671.614	495.819	0	0	1590	26.5
1605	1.5	26.5167		0.289	1.5	0.296	1.5	0.239	0	0	0	0	0.4335	0.444	0.3585	0	0	618.661	672.058	496.178	0	0	1591	26.5167
1606	1.5	26.5333		0.289	1.5	0.296	1.5	0.239	0	0	0	0	0.4335	0.444	0.3585	0	0	619.095	672.502	496.536	0	0	1592	26.5333
1607	1.5	26.55		0.289	1.5	0.297	1.5	0.239	0	0	0	0	0.4335	0.4455	0.3585	0	0	619.528	672.948	496.895	0	0	1593	26.55
1608	1.5	26.5667		0.289	1.5	0.297	1.5	0.239	0	0	0	0	0.4335	0.4455	0.3585	0	0	619.962	673.393	497.253	0	0	1594	26.5667
1609	1.5	26.5833		0.289	1.5	0.297	1.5	0.247	0	0	0	0	0.4335	0.4455	0.3705	0	0	620.395	673.839	497.624	0	0	1595	26.5833
1610	1.5	26.6		0.29	1.5	0.297	1.5	0.245	0	0	0	0	0.435	0.4455	0.3675	0	0	620.83	674.284	497.991	0	0	1596	26.6
1611	1.5	26.6167		0.29	1.5	0.297	1.5	0.243	0	0	0	0	0.435	0.4455	0.3645	0	0	621.265	674.73	498.356	0	0	1597	26.6167
1612	1.5	26.6333		0.29	2.11	0.622	1.5	0.241	0	0	0	0	0.435	1.31242	0.3615	0	0	621.7	676.042	498.717	0	0	1598	26.6333
1613	1.5	26.65		0.29	1.5	0.306	1.5	0.241	0	0	0	0	0.435	0.459	0.3615	0	0	622.135	676.501	499.079	0	0	1599	26.65
1614	1.5	26.6667		0.29	1.5	0.305	1.5	0.24	0	0	0	0	0.435	0.4575	0.36	0	0	622.57	676.959	499.439	0	0	1600	26.6667
1615	1.5	26.6833		0.299	1.5	0.305	1.5	0.24	0	0	0	0	0.4485	0.4575	0.36	0	0	623.019	677.416	499.799	0	0	1601	26.6833
1616	1.5	26.7		0.298	1.5	0.303	1.5	0.24	0	0	0	0	0.447	0.4545	0.36	0	0	623.466	677.871	500.159	0	0	1602	26.7
1617	1.5	26.7167		0.297	1.5	0.302	1.5	0.24	0	0	0	0	0.4455	0.453	0.36	0	0	623.911	678.324	500.519	0	0	1603	26.7167
1618	1.5	26.7333		0.296	1.5	0.301	1.5	0.239	0	0	0	0	0.444	0.4515	0.3585	0	0	624.355	678.775	500.877	0	0	1604	26.7333
1619	1.5	26.75		0.295	1.5	0.3	1.5	0.239	0	0	0	0	0.4425	0.45	0.3585	0	0	624.798	679.225	501.236	0	0	1605	26.75
1620	1.5	26.7667		0.294	1.5	0.3	1.5	0.239	0	0	0	0	0.441	0.45	0.3585	0	0	625.239	679.675	501.594	0	0	1606	26.7667
1621	1.5	26.7833		0.293	1.5	0.299	1.5	0.239	0	0	0	0	0.4395	0.4485	0.3585	0	0	625.678	680.124	501.953	0	0	1607	26.7833
1622	1.5	26.8		0.292	1.5	0.299	1.5	0.24	0	0	0	0	0.438	0.4485	0.36	0	0	626.116	680.572	502.313	0	0	1608	26.8
1623	1.5	26.8167		0.292	1.5	0.298	1.5	0.24	0	0	0	0	0.438	0.447	0.36	0	0	626.554	681.019	502.673	0	0	1609	26.8167
1624	1.5	26.8333		0.291	1.5	0.298	1.5	0.24	0	0	0	0	0.4365	0.447	0.36	0	0	626.991	681.466	503.033	0	0	1610	26.8333
1625	1.5	26.85		0.29	1.5	0.298	1.5	0.24	0	0	0	0	0.435	0.447	0.36	0	0	627.426	681.913	503.393	0	0	1611	26.85
1626	1.5	26.8667		0.29	1.5	0.297	1.5	0.24	0	0	0	0	0.435	0.4455	0.36	0	0	627.861	682.359	503.753	0	0	1612	26.8667
1627	1.5	26.8833		0.29	1.5	0.297	1.5	0.24	0	0	0	0	0.435	0.4455	0.36	0	0	628.296	682.804	504.113	0	0	1613	26.8833
1628	1.5	26.9		0.29	1.5	0.297	1.5	0.24	0	0	0	0	0.435	0.4455	0.36	0	0	628.731	683.25	504.473	0	0	1614	26.9
1629	1.5	26.9167		0.29	1.5	0.297	1.5	0.239	0	0	0	0	0.435	0.4455	0.3585	0	0	629.166	683.695	504.831	0	0	1615	26.9167
1630	1.5	26.9333		0.29	1.5	0.297	1.5	0.24	0	0	0	0	0.435	0.4455	0.36	0	0	629.601	684.141	505.191	0	0	1616	26.9333
1631	1.5	26.95		0.29	1.5	0.297	1.5	0.24	0	0	0	0	0.435	0.4455	0.36	0	0	630.036	684.586	505.551	0	0	1617	26.95
1632	1.5	26.9667		0.29	1.5	0.297	1.5	0.24	0	0	0	0	0.435	0.4455	0.36	0	0	630.471	685.032	505.911	0	0	1618	26.9667
1633	1.5	26.9833		0.29	1.5	0.296	1.5	0.24	0	0	0	0	0.435	0.444	0.36	0	0	630.906	685.476	506.271	0	0	1619	26.9833
1634	1.5	27		0.291	1.5	0.296	1.5	0.24	0	0	0	0	0.4365	0.444	0.36	0	0	631.342	685.92	506.631	0	0	1620	27
1635	1.5	27.0167		0.291	1.5	0.296	1.5	0.24	0	0	0	0	0.4365	0.444	0.36	0	0	631.779	686.364	506.991	0	0	1621	27.0167
1636	1.5	27.0333		0.291	1.5	0.296	1.5	0.24	0	0	0	0	0.4365	0.444	0.36	0	0	632.215	686.808	507.351	0	0	1622	27.0333
1637	1.5	27.05		0.291	1.5	0.295	1.5	0.24	0	0	0	0	0.4365	0.4425	0.36	0	0	632.652	687.25	507.711	0	0	1623	27.05
1638	1.5	27.0667		0.291	1.5	0.295	1.5	0.24	0	0	0	0	0.4365	0.4425	0.36	0	0	633.088	687.693	508.071	0	0	1624	27.0667
1639	1.5	27.0833		0.291	1.5	0.295	1.5	0.246	0	0	0	0	0.4365	0.4425	0.369	0	0	633.525	688.135	508.44	0	0	1625	27.0833
1640	1.5	27.1		0.291	1.5	0.295	1.5	0.243	0	0	0	0	0.4365	0.4425	0.3645	0	0	633.961	688.578	508.805	0	0	1626	27.1
1641	1.5	27.1167		0.292	1.5	0.295	1.5	0.242	0	0	0	0	0.438	0.4425	0.363	0	0	634.399	689.02	509.168	0	0	1627	27.1167
1642	1.5	27.1333		0.291	2.45	0.311	1.5	0.24	0	0	0	0	0.4365	0.76195	0.36	0	0	634.836	689.782	509.528	0	0	1628	27.1333
1643	1.5	27.15		0.291	1.5	0.305	1.5	0.24	0	0	0	0	0.4365	0.4575	0.36	0	0	635.272	690.24	509.888	0	0	1629	27.15
1644	1.5	27.1667		0.292	1.5	0.304	1.5	0.239	0	0	0	0	0.438	0.456	0.3585	0	0	635.71	690.696	510.246	0	0	1630	27.1667
1645	1.5	27.1833		0.301	1.5	0.304	1.5	0.239	0	0	0	0	0.4515	0.456	0.3585	0	0	636.162	691.152	510.605	0	0	1631	27.1833
1646	1.5	27.2		0.3	1.5	0.303	1.5	0.239	0	0	0	0	0.45	0.4545	0.3585	0	0	636.612	691.606	510.963	0	0	1632	27.2
1647	1.5	27.2167		0.299	1.5	0.302	1.5	0.239	0	0	0	0	0.4485	0.453	0.3585	0	0	637.06	692.059	511.322	0	0	1633	27.2167
1648	1.5	27.2333		0.298	1.5	0.301	1.5	0.239	0	0	0	0	0.447	0.4515	0.3585	0	0	637.507	692.511	511.68	0	0	1634	27.2333
1649	1.5	27.25		0.297	1.5	0.3	1.5	0.239	0	0	0	0	0.4455	0.45	0.3585	0	0	637.953	692.961	512.039	0	0	1635	27.25
1650	1.5	27.2667		0.296	1.5	0.3	1.5	0.239	0	0	0	0	0.444	0.45	0.3585	0	0	638.397	693.411	512.397	0	0	1636	27.2667
1651	1.5	27.2833		0.296	1.5	0.299	1.5	0.239	0	0	0	0	0.444	0.4485	0.3585	0	0	638.841	693.859	512.756	0	0	1637	27.2833
1652	1.5	27.3		0.295	1.5	0.299	1.5	0.239	0	0	0	0	0.4425	0.4485	0.3585	0	0	639.283	694.308	513.114	0	0	1638	27.3
1653	1.5	27.3167		0.295	1.5	0.298	1.5	0.238	0	0	0	0	0.4425	0.447	0.357	0	0	639.726	694.755	513.471	0	0	1639	27.3167
1654	1.5	27.3333		0.294	1.5	0.298	1.5	0.238	0	0	0	0	0.441	0.447	0.357	0	0	640.167	695.202	513.828	0	0	1640	27.3333
1655	1.5	27.35		0.294	1.5	0.297	1.5	0.238	0	0	0	0	0.441	0.4455	0.357	0	0	640.608	695.647	514.185	0	0	1641	27.35
1656	1.5	27.3667		0.293	1.5	0.297	1.5	0.238	0	0	0	0	0.4395	0.4455	0.357	0	0	641.047	696.093	514.542	0	0	1642	27.3667
1657	1.5	27.3833		0.293	1.5	0.297	1.5	0.238	0	0	0	0	0.4395	0.4455	0.357	0	0	641.487	696.538	514.899	0	0	1643	27.3833
1658	1.5	27.4		0.293	1.5	0.297	1.5	0.238	0	0	0	0	0.4395	0.4455	0.357	0	0	641.926	696.984	515.256	0	0	1644	27.4
1659	1.5	27.4167		0.292	1.5	0.297	1.5	0.238	0	0	0	0	0.438	0.4455	0.357	0	0	642.364	697.429	515.613	0	0	1645	27.4167
1660	1.5	27.4333		0.293	1.5	0.297	1.5	0.238	0	0	0	0	0.4395	0.4455	0.357	0	0	642.804	697.875	515.97	0	0	1646	27.4333
1661	1.5	27.45		0.292	1.5	0.297	1.5	0.238	0	0	0	0	0.438	0.4455	0.357	0	0	643.242	698.32	516.327	0	0	1647	27.45
1662	1.5	27.4667		0.292	1.5	0.297	1.5	0.238	0	0	0	0	0.438	0.4455	0.357	0	0	643.68	698.766	516.684	0	0	1648	27.4667
1663	1.5	27.4833		0.292	1.5	0.296	1.5	0.238	0	0	0	0	0.438	0.444	0.357	0	0	644.118	699.21	517.041	0	0	1649	27.4833
1664	1.5	27.5		0.292	1.5	0.297	1.5	0.238	0	0	0	0	0.438	0.4455	0.357	0	0	644.556	699.655	517.398	0	0	1650	27.5
1665	1.5	27.5167		0.292	1.5	0.297	1.5	0.238	0	0	0	0	0.438	0.4455	0.357	0	0	644.994	700.101	517.755	0	0	1651	27.5167
1666	1.5	27.5333		0.292	1.5	0.297	1.5	0.238	0	0	0	0	0.438	0.4455	0.357	0	0	645.432	700.546	518.112	0	0	1652	27.5333
1667	1.5	27.55		0.292	1.5	0.297	1.5	0.238	0	0	0	0	0.438	0.4455	0.357	0	0	645.87	700.992	518.469	0	0	1653	27.55
1668	1.5	27.5667		0.292	1.5	0.297	1.5	0.238	0	0	0	0	0.438	0.4455	0.357	0	0	646.308	701.437	518.826	0	0	1654	27.5667
1669	1.5	27.5833		0.292	1.5	0.297	1.5	0.245	0	0	0	0	0.438	0.4455	0.3675	0	0	646.746	701.883	519.194	0	0	1655	27.5833
1670	1.5	27.6		0.292	1.5	0.296	1.5	0.242	0	0	0	0	0.438	0.444	0.363	0	0	647.184	702.327	519.557	0	0	1656	27.6
1671	1.5	27.6167		0.292	1.5	0.296	1.5	0.24	0	0	0	0	0.438	0.444	0.36	0	0	647.622	702.771	519.917	0	0	1657	27.6167
1672	1.5	27.6333		0.291	1.83	0.724	1.5	0.239	0	0	0	0	0.4365	1.32492	0.3585	0	0	648.058	704.096	520.275	0	0	1658	27.6333
1673	1.5	27.65		0.291	1.5	0.305	1.5	0.239	0	0	0	0	0.4365	0.4575	0.3585	0	0	648.495	704.553	520.634	0	0	1659	27.65
1674	1.5	27.6667		0.291	1.5	0.304	1.5	0.239	0	0	0	0	0.4365	0.456	0.3585	0	0	648.931	705.009	520.992	0	0	1660	27.6667
1675	1.5	27.6833		0.3	1.5	0.304	1.5	0.238	0	0	0	0	0.45	0.456	0.357	0	0	649.381	705.465	521.349	0	0	1661	27.6833
1676	1.5	27.7		0.299	1.5	0.302	1.5	0.238	0	0	0	0	0.4485	0.453	0.357	0	0	649.83	705.918	521.706	0	0	1662	27.7
1677	1.5	27.7167		0.298	1.5	0.302	1.5	0.238	0	0	0	0	0.447	0.453	0.357	0	0	650.277	706.371	522.063	0	0	1663	27.7167
1678	1.5	27.7333		0.295	1.5	0.303	1.5	0.238	0	0	0	0	0.4425	0.4545	0.357	0	0	650.719	706.826	522.42	0	0	1664	27.7333
1679	1.5	27.75		0.294	1.5	0.302	1.5	0.238	0	0	0	0	0.441	0.453	0.357	0	0	651.16	707.279	522.777	0	0	1665	27.75
1680	1.5	27.7667		0.294	1.5	0.301	1.5	0.238	0	0	0	0	0.441	0.4515	0.357	0	0	651.601	707.73	523.134	0	0	1666	27.7667
1681	1.5	27.7833		0.293	1.5	0.3	1.5	0.238	0	0	0	0	0.4395	0.45	0.357	0	0	652.041	708.18	523.491	0	0	1667	27.7833
1682	1.5	27.8		0.292	1.5	0.3	1.5	0.238	0	0	0	0	0.438	0.45	0.357	0	0	652.479	708.63	523.848	0	0	1668	27.8
1683	1.5	27.8167		0.291	1.5	0.3	1.5	0.238	0	0	0	0	0.4365	0.45	0.357	0	0	652.915	709.08	524.205	0	0	1669	27.8167
1684	1.5	27.8333		0.291	1.5	0.3	1.5	0.238	0	0	0	0	0.4365	0.45	0.357	0	0	653.352	709.53	524.562	0	0	1670	27.8333
1685	1.5	27.85		0.291	1.5	0.3	1.5	0.238	0	0	0	0	0.4365	0.45	0.357	0	0	653.788	709.98	524.919	0	0	1671	27.85
1686	1.5	27.8667		0.29	1.5	0.3	1.5	0.238	0	0	0	0	0.435	0.45	0.357	0	0	654.223	710.43	525.276	0	0	1672	27.8667
1687	1.5	27.8833		0.29	1.5	0.301	1.5	0.238	0	0	0	0	0.435	0.4515	0.357	0	0	654.658	710.882	525.633	0	0	1673	27.8833
1688	1.5	27.9		0.289	1.5	0.304	1.5	0.238	0	0	0	0	0.4335	0.456	0.357	0	0	655.092	711.338	525.99	0	0	1674	27.9
1689	1.5	27.9167		0.289	1.5	0.304	1.5	0.238	0	0	0	0	0.4335	0.456	0.357	0	0	655.525	711.794	526.347	0	0	1675	27.9167
1690	1.5	27.9333		0.289	1.5	0.304	1.5	0.238	0	0	0	0	0.4335	0.456	0.357	0	0	655.959	712.25	526.704	0	0	1676	27.9333
1691	1.5	27.95		0.288	1.5	0.304	1.5	0.238	0	0	0	0	0.432	0.456	0.357	0	0	656.391	712.706	527.061	0	0	1677	27.95
1692	1.5	27.9667		0.288	1.5	0.305	1.5	0.238	0	0	0	0	0.432	0.4575	0.357	0	0	656.823	713.163	527.418	0	0	1678	27.9667
1693	1.5	27.9833		0.288	1.5	0.305	1.5	0.237	0	0	0	0	0.432	0.4575	0.3555	0	0	657.255	713.621	527.774	0	0	1679	27.9833
1694	1.5	28		0.288	1.5	0.305	1.5	0.238	0	0	0	0	0.432	0.4575	0.357	0	0	657.687	714.078	528.131	0	0	1680	28
1695	1.5	28.0167		0.287	1.5	0.305	1.5	0.238	0	0	0	0	0.4305	0.4575	0.357	0	0	658.117	714.536	528.488	0	0	1681	28.0167
1696	1.5	28.0333		0.287	1.5	0.305	1.5	0.238	0	0	0	0	0.4305	0.4575	0.357	0	0	658.548	714.993	528.845	0	0	1682	28.0333
1697	1.5	28.05		0.287	1.5	0.305	1.5	0.238	0	0	0	0	0.4305	0.4575	0.357	0	0	658.978	715.451	529.202	0	0	1683	28.05
1698	1.5	28.0667		0.287	1.5	0.305	1.5	0.238	0	0	0	0	0.4305	0.4575	0.357	0	0	659.409	715.908	529.559	0	0	1684	28.0667
1699	1.5	28.0833		0.287	1.5	0.305	1.5	0.249	0	0	0	0	0.4305	0.4575	0.3735	0	0	659.839	716.366	529.932	0	0	1685	28.0833
1700	1.5	28.1		0.288	1.5	0.305	1.5	0.247	0	0	0	0	0.432	0.4575	0.3705	0	0	660.271	716.823	530.303	0	0	1686	28.1
1701	1.5	28.1167		0.287	1.5	0.305	1.5	0.245	0	0	0	0	0.4305	0.4575	0.3675	0	0	660.702	717.281	530.67	0	0	1687	28.1167
1702	1.5	28.1333		0.287	2.71	0.315	1.5	0.243	0	0	0	0	0.4305	0.85365	0.3645	0	0	661.132	718.134	531.035	0	0	1688	28.1333
1703	1.5	28.15		0.288	1.5	0.311	1.5	0.243	0	0	0	0	0.432	0.4665	0.3645	0	0	661.564	718.601	531.399	0	0	1689	28.15
1704	1.5	28.1667		0.288	1.5	0.311	1.5	0.242	0	0	0	0	0.432	0.4665	0.363	0	0	661.996	719.067	531.762	0	0	1690	28.1667
1705	1.5	28.1833		0.297	1.5	0.31	1.5	0.242	0	0	0	0	0.4455	0.465	0.363	0	0	662.442	719.532	532.125	0	0	1691	28.1833
1706	1.5	28.2		0.296	1.5	0.309	1.5	0.242	0	0	0	0	0.444	0.4635	0.363	0	0	662.886	719.996	532.488	0	0	1692	28.2
1707	1.5	28.2167		0.295	1.5	0.308	1.5	0.242	0	0	0	0	0.4425	0.462	0.363	0	0	663.328	720.458	532.851	0	0	1693	28.2167
1708	1.5	28.2333		0.294	1.5	0.307	1.5	0.242	0	0	0	0	0.441	0.4605	0.363	0	0	663.769	720.918	533.214	0	0	1694	28.2333
1709	1.5	28.25		0.293	1.5	0.307	1.5	0.242	0	0	0	0	0.4395	0.4605	0.363	0	0	664.209	721.379	533.577	0	0	1695	28.25
1710	1.5	28.2667		0.292	1.5	0.306	1.5	0.242	0	0	0	0	0.438	0.459	0.363	0	0	664.647	721.838	533.94	0	0	1696	28.2667
1711	1.5	28.2833		0.292	1.5	0.306	1.5	0.242	0	0	0	0	0.438	0.459	0.363	0	0	665.085	722.297	534.303	0	0	1697	28.2833
1712	1.5	28.3		0.291	1.5	0.306	1.5	0.242	0	0	0	0	0.4365	0.459	0.363	0	0	665.521	722.756	534.666	0	0	1698	28.3
1713	1.5	28.3167		0.29	1.5	0.305	1.5	0.242	0	0	0	0	0.435	0.4575	0.363	0	0	665.956	723.213	535.029	0	0	1699	28.3167
1714	1.5	28.3333		0.29	1.5	0.305	1.5	0.242	0	0	0	0	0.435	0.4575	0.363	0	0	666.391	723.671	535.392	0	0	1700	28.3333
1715	1.5	28.35		0.29	1.5	0.304	1.5	0.242	0	0	0	0	0.435	0.456	0.363	0	0	666.826	724.127	535.755	0	0	1701	28.35
1716	1.5	28.3667		0.29	1.5	0.304	1.5	0.242	0	0	0	0	0.435	0.456	0.363	0	0	667.261	724.583	536.118	0	0	1702	28.3667
1717	1.5	28.3833		0.289	1.5	0.304	1.5	0.242	0	0	0	0	0.4335	0.456	0.363	0	0	667.695	725.039	536.481	0	0	1703	28.3833
1718	1.5	28.4		0.289	1.5	0.304	1.5	0.242	0	0	0	0	0.4335	0.456	0.363	0	0	668.128	725.495	536.844	0	0	1704	28.4
1719	1.5	28.4167		0.289	1.5	0.304	1.5	0.242	0	0	0	0	0.4335	0.456	0.363	0	0	668.562	725.951	537.207	0	0	1705	28.4167
1720	1.5	28.4333		0.289	1.5	0.304	1.5	0.242	0	0	0	0	0.4335	0.456	0.363	0	0	668.995	726.407	537.57	0	0	1706	28.4333
1721	1.5	28.45		0.289	1.5	0.304	1.5	0.242	0	0	0	0	0.4335	0.456	0.363	0	0	669.429	726.863	537.933	0	0	1707	28.45
1722	1.5	28.4667		0.289	1.5	0.304	1.5	0.242	0	0	0	0	0.4335	0.456	0.363	0	0	669.862	727.319	538.296	0	0	1708	28.4667
1723	1.5	28.4833		0.289	1.5	0.304	1.5	0.242	0	0	0	0	0.4335	0.456	0.363	0	0	670.296	727.775	538.659	0	0	1709	28.4833
1724	1.5	28.5		0.289	1.5	0.304	1.5	0.242	0	0	0	0	0.4335	0.456	0.363	0	0	670.729	728.231	539.022	0	0	1710	28.5
1725	1.5	28.5167		0.289	1.5	0.304	1.5	0.242	0	0	0	0	0.4335	0.456	0.363	0	0	671.163	728.687	539.385	0	0	1711	28.5167
1726	1.5	28.5333		0.289	1.5	0.304	1.5	0.242	0	0	0	0	0.4335	0.456	0.363	0	0	671.596	729.143	539.748	0	0	1712	28.5333
1727	1.5	28.55		0.289	1.5	0.304	1.5	0.242	0	0	0	0	0.4335	0.456	0.363	0	0	672.03	729.599	540.111	0	0	1713	28.55
1728	1.5	28.5667		0.289	1.5	0.304	1.5	0.242	0	0	0	0	0.4335	0.456	0.363	0	0	672.463	730.055	540.474	0	0	1714	28.5667
1729	1.5	28.5833		0.289	1.5	0.304	1.5	0.25	0	0	0	0	0.4335	0.456	0.375	0	0	672.897	730.511	540.849	0	0	1715	28.5833
1730	1.5	28.6		0.289	1.5	0.304	1.5	0.247	0	0	0	0	0.4335	0.456	0.3705	0	0	673.33	730.967	541.22	0	0	1716	28.6
1731	1.5	28.6167		0.29	1.5	0.304	1.5	0.245	0	0	0	0	0.435	0.456	0.3675	0	0	673.765	731.423	541.587	0	0	1717	28.6167
1732	1.5	28.6333		0.29	1.5	0.83	1.5	0.244	0	0	0	0	0.435	1.245	0.366	0	0	674.2	732.668	541.953	0	0	1718	28.6333
1733	1.5	28.65		0.29	1.5	0.313	1.5	0.243	0	0	0	0	0.435	0.4695	0.3645	0	0	674.635	733.137	542.318	0	0	1719	28.65
1734	1.5	28.6667		0.291	1.5	0.312	1.5	0.243	0	0	0	0	0.4365	0.468	0.3645	0	0	675.072	733.605	542.682	0	0	1720	28.6667
1735	1.5	28.6833		0.3	1.5	0.311	1.5	0.243	0	0	0	0	0.45	0.4665	0.3645	0	0	675.522	734.072	543.047	0	0	1721	28.6833
1736	1.5	28.7		0.299	1.5	0.31	1.5	0.243	0	0	0	0	0.4485	0.465	0.3645	0	0	675.97	734.537	543.411	0	0	1722	28.7
1737	1.5	28.7167		0.298	1.5	0.309	1.5	0.243	0	0	0	0	0.447	0.4635	0.3645	0	0	676.417	735	543.776	0	0	1723	28.7167
1738	1.5	28.7333		0.297	1.5	0.309	1.5	0.243	0	0	0	0	0.4455	0.4635	0.3645	0	0	676.863	735.464	544.14	0	0	1724	28.7333
1739	1.5	28.75		0.297	1.5	0.308	1.5	0.243	0	0	0	0	0.4455	0.462	0.3645	0	0	677.308	735.926	544.505	0	0	1725	28.75
1740	1.5	28.7667		0.296	1.5	0.307	1.5	0.243	0	0	0	0	0.444	0.4605	0.3645	0	0	677.752	736.386	544.869	0	0	1726	28.7667
1741	1.5	28.7833		0.295	1.5	0.306	1.5	0.243	0	0	0	0	0.4425	0.459	0.3645	0	0	678.195	736.845	545.234	0	0	1727	28.7833
1742	1.5	28.8		0.295	1.5	0.306	1.5	0.243	0	0	0	0	0.4425	0.459	0.3645	0	0	678.637	737.304	545.598	0	0	1728	28.8
1743	1.5	28.8167		0.294	1.5	0.305	1.5	0.243	0	0	0	0	0.441	0.4575	0.3645	0	0	679.078	737.762	545.963	0	0	1729	28.8167
1744	1.5	28.8333		0.294	1.5	0.305	1.5	0.243	0	0	0	0	0.441	0.4575	0.3645	0	0	679.519	738.219	546.327	0	0	1730	28.8333
1745	1.5	28.85		0.294	1.5	0.304	1.5	0.243	0	0	0	0	0.441	0.456	0.3645	0	0	679.96	738.675	546.692	0	0	1731	28.85
1746	1.5	28.8667		0.293	1.5	0.302	1.5	0.242	0	0	0	0	0.4395	0.453	0.363	0	0	680.4	739.128	547.055	0	0	1732	28.8667
1747	1.5	28.8833		0.293	1.5	0.298	1.5	0.242	0	0	0	0	0.4395	0.447	0.363	0	0	680.839	739.575	547.418	0	0	1733	28.8833
1748	1.5	28.9		0.293	1.5	0.3	1.5	0.243	0	0	0	0	0.4395	0.45	0.3645	0	0	681.279	740.025	547.782	0	0	1734	28.9
1749	1.5	28.9167		0.293	1.5	0.3	1.5	0.243	0	0	0	0	0.4395	0.45	0.3645	0	0	681.718	740.475	548.147	0	0	1735	28.9167
1750	1.5	28.9333		0.293	1.5	0.3	1.5	0.243	0	0	0	0	0.4395	0.45	0.3645	0	0	682.158	740.925	548.511	0	0	1736	28.9333
1751	1.5	28.95		0.292	1.5	0.3	1.5	0.243	0	0	0	0	0.438	0.45	0.3645	0	0	682.596	741.375	548.876	0	0	1737	28.95
1752	1.5	28.9667		0.292	1.5	0.3	1.5	0.243	0	0	0	0	0.438	0.45	0.3645	0	0	683.034	741.825	549.24	0	0	1738	28.9667
1753	1.5	28.9833		0.292	1.5	0.3	1.5	0.243	0	0	0	0	0.438	0.45	0.3645	0	0	683.472	742.275	549.605	0	0	1739	28.9833
1754	1.5	29		0.292	1.5	0.3	1.5	0.243	0	0	0	0	0.438	0.45	0.3645	0	0	683.91	742.725	549.969	0	0	1740	29
1755	1.5	29.0167		0.292	1.5	0.3	1.5	0.243	0	0	0	0	0.438	0.45	0.3645	0	0	684.348	743.175	550.334	0	0	1741	29.0167
1756	1.5	29.0333		0.292	1.5	0.299	1.5	0.243	0	0	0	0	0.438	0.4485	0.3645	0	0	684.786	743.624	550.698	0	0	1742	29.0333
1757	1.5	29.05		0.292	1.5	0.299	1.5	0.243	0	0	0	0	0.438	0.4485	0.3645	0	0	685.224	744.072	551.063	0	0	1743	29.05
1758	1.5	29.0667		0.292	1.5	0.299	1.5	0.243	0	0	0	0	0.438	0.4485	0.3645	0	0	685.662	744.521	551.427	0	0	1744	29.0667
1759	1.5	29.0833		0.292	1.5	0.299	1.5	0.249	0	0	0	0	0.438	0.4485	0.3735	0	0	686.1	744.969	551.801	0	0	1745	29.0833
1760	1.5	29.1		0.292	1.5	0.299	1.5	0.246	0	0	0	0	0.438	0.4485	0.369	0	0	686.538	745.418	552.17	0	0	1746	29.1
1761	1.5	29.1167		0.292	1.5	0.298	1.5	0.244	0	0	0	0	0.438	0.447	0.366	0	0	686.976	745.865	552.536	0	0	1747	29.1167
1762	1.5	29.1333		0.292	3.01	0.314	1.5	0.243	0	0	0	0	0.438	0.94514	0.3645	0	0	687.414	746.81	552.9	0	0	1748	29.1333
1763	1.5	29.15		0.292	1.5	0.309	1.5	0.242	0	0	0	0	0.438	0.4635	0.363	0	0	687.852	747.273	553.263	0	0	1749	29.15
1764	1.5	29.1667		0.292	1.5	0.308	1.5	0.242	0	0	0	0	0.438	0.462	0.363	0	0	688.29	747.735	553.626	0	0	1750	29.1667
1765	1.5	29.1833		0.301	1.5	0.307	1.5	0.242	0	0	0	0	0.4515	0.4605	0.363	0	0	688.741	748.196	553.989	0	0	1751	29.1833
1766	1.5	29.2		0.3	1.5	0.306	1.5	0.241	0	0	0	0	0.45	0.459	0.3615	0	0	689.191	748.655	554.351	0	0	1752	29.2
1767	1.5	29.2167		0.298	1.5	0.305	1.5	0.241	0	0	0	0	0.447	0.4575	0.3615	0	0	689.638	749.112	554.712	0	0	1753	29.2167
1768	1.5	29.2333		0.297	1.5	0.304	1.5	0.241	0	0	0	0	0.4455	0.456	0.3615	0	0	690.084	749.568	555.074	0	0	1754	29.2333
1769	1.5	29.25		0.297	1.5	0.304	1.5	0.241	0	0	0	0	0.4455	0.456	0.3615	0	0	690.529	750.024	555.435	0	0	1755	29.25
1770	1.5	29.2667		0.296	1.5	0.303	1.5	0.241	0	0	0	0	0.444	0.4545	0.3615	0	0	690.973	750.479	555.797	0	0	1756	29.2667
1771	1.5	29.2833		0.295	1.5	0.303	1.5	0.241	0	0	0	0	0.4425	0.4545	0.3615	0	0	691.416	750.933	556.158	0	0	1757	29.2833
1772	1.5	29.3		0.294	1.5	0.302	1.5	0.241	0	0	0	0	0.441	0.453	0.3615	0	0	691.857	751.386	556.52	0	0	1758	29.3
1773	1.5	29.3167		0.294	1.5	0.302	1.5	0.241	0	0	0	0	0.441	0.453	0.3615	0	0	692.298	751.839	556.881	0	0	1759	29.3167
1774	1.5	29.3333		0.293	1.5	0.302	1.5	0.241	0	0	0	0	0.4395	0.453	0.3615	0	0	692.737	752.292	557.243	0	0	1760	29.3333
1775	1.5	29.35		0.293	1.5	0.302	1.5	0.241	0	0	0	0	0.4395	0.453	0.3615	0	0	693.177	752.745	557.604	0	0	1761	29.35
1776	1.5	29.3667		0.293	1.5	0.301	1.5	0.241	0	0	0	0	0.4395	0.4515	0.3615	0	0	693.616	753.197	557.966	0	0	1762	29.3667
1777	1.5	29.3833		0.293	1.5	0.301	1.5	0.241	0	0	0	0	0.4395	0.4515	0.3615	0	0	694.056	753.648	558.327	0	0	1763	29.3833
1778	1.5	29.4		0.292	1.5	0.301	1.5	0.241	0	0	0	0	0.438	0.4515	0.3615	0	0	694.494	754.1	558.689	0	0	1764	29.4
1779	1.5	29.4167		0.292	1.5	0.302	1.5	0.241	0	0	0	0	0.438	0.453	0.3615	0	0	694.932	754.553	559.05	0	0	1765	29.4167
1780	1.5	29.4333		0.292	1.5	0.303	1.5	0.241	0	0	0	0	0.438	0.4545	0.3615	0	0	695.37	755.007	559.412	0	0	1766	29.4333
1781	1.5	29.45		0.292	1.5	0.302	1.5	0.241	0	0	0	0	0.438	0.453	0.3615	0	0	695.808	755.46	559.773	0	0	1767	29.45
1782	1.5	29.4667		0.292	1.5	0.302	1.5	0.241	0	0	0	0	0.438	0.453	0.3615	0	0	696.246	755.913	560.135	0	0	1768	29.4667
1783	1.5	29.4833		0.292	1.5	0.302	1.5	0.241	0	0	0	0	0.438	0.453	0.3615	0	0	696.684	756.366	560.496	0	0	1769	29.4833
1784	1.5	29.5		0.291	1.5	0.302	1.5	0.241	0	0	0	0	0.4365	0.453	0.3615	0	0	697.12	756.819	560.858	0	0	1770	29.5
1785	1.5	29.5167		0.291	1.5	0.302	1.5	0.241	0	0	0	0	0.4365	0.453	0.3615	0	0	697.557	757.272	561.219	0	0	1771	29.5167
1786	1.5	29.5333		0.291	1.5	0.302	1.5	0.241	0	0	0	0	0.4365	0.453	0.3615	0	0	697.993	757.725	561.581	0	0	1772	29.5333
1787	1.5	29.55		0.291	1.5	0.302	1.5	0.241	0	0	0	0	0.4365	0.453	0.3615	0	0	698.43	758.178	561.942	0	0	1773	29.55
1788	1.5	29.5667		0.291	1.5	0.302	1.5	0.241	0	0	0	0	0.4365	0.453	0.3615	0	0	698.866	758.631	562.304	0	0	1774	29.5667
1789	1.5	29.5833		0.291	1.5	0.302	1.5	0.247	0	0	0	0	0.4365	0.453	0.3705	0	0	699.303	759.084	562.674	0	0	1775	29.5833
1790	1.5	29.6		0.291	1.5	0.302	1.5	0.245	0	0	0	0	0.4365	0.453	0.3675	0	0	699.739	759.537	563.042	0	0	1776	29.6
1791	1.5	29.6167		0.291	1.5	0.302	1.5	0.243	0	0	0	0	0.4365	0.453	0.3645	0	0	700.176	759.99	563.406	0	0	1777	29.6167
1792	1.5	29.6333		0.291	1.5	0.929	1.5	0.242	0	0	0	0	0.4365	1.3935	0.363	0	0	700.612	761.384	563.769	0	0	1778	29.6333
1793	1.5	29.65		0.291	1.5	0.311	1.5	0.242	0	0	0	0	0.4365	0.4665	0.363	0	0	701.049	761.85	564.132	0	0	1779	29.65
1794	1.5	29.6667		0.291	1.5	0.311	1.5	0.241	0	0	0	0	0.4365	0.4665	0.3615	0	0	701.485	762.317	564.494	0	0	1780	29.6667
1795	1.5	29.6833		0.299	1.5	0.308	1.5	0.241	0	0	0	0	0.4485	0.462	0.3615	0	0	701.934	762.779	564.855	0	0	1781	29.6833
1796	1.5	29.7		0.298	1.5	0.307	1.5	0.241	0	0	0	0	0.447	0.4605	0.3615	0	0	702.381	763.239	565.217	0	0	1782	29.7
1797	1.5	29.7167		0.297	1.5	0.306	1.5	0.241	0	0	0	0	0.4455	0.459	0.3615	0	0	702.826	763.698	565.578	0	0	1783	29.7167
1798	1.5	29.7333		0.296	1.5	0.306	1.5	0.241	0	0	0	0	0.444	0.459	0.3615	0	0	703.27	764.157	565.94	0	0	1784	29.7333
1799	1.5	29.75		0.296	1.5	0.305	1.5	0.241	0	0	0	0	0.444	0.4575	0.3615	0	0	703.714	764.615	566.301	0	0	1785	29.75
1800	1.5	29.7667		0.295	1.5	0.304	1.5	0.24	0	0	0	0	0.4425	0.456	0.36	0	0	704.157	765.071	566.661	0	0	1786	29.7667
1801	1.5	29.7833		0.294	1.5	0.303	1.5	0.24	0	0	0	0	0.441	0.4545	0.36	0	0	704.598	765.525	567.021	0	0	1787	29.7833
1802	1.5	29.8		0.294	1.5	0.303	1.5	0.24	0	0	0	0	0.441	0.4545	0.36	0	0	705.039	765.98	567.381	0	0	1788	29.8
1803	1.5	29.8167		0.293	1.5	0.303	1.5	0.24	0	0	0	0	0.4395	0.4545	0.36	0	0	705.478	766.434	567.741	0	0	1789	29.8167
1804	1.5	29.8333		0.292	1.5	0.303	1.5	0.24	0	0	0	0	0.438	0.4545	0.36	0	0	705.916	766.889	568.101	0	0	1790	29.8333
1805	1.5	29.85		0.292	1.5	0.302	1.5	0.24	0	0	0	0	0.438	0.453	0.36	0	0	706.354	767.342	568.461	0	0	1791	29.85
1806	1.5	29.8667		0.292	1.5	0.302	1.5	0.239	0	0	0	0	0.438	0.453	0.3585	0	0	706.792	767.795	568.82	0	0	1792	29.8667
1807	1.5	29.8833		0.291	1.5	0.302	1.5	0.239	0	0	0	0	0.4365	0.453	0.3585	0	0	707.229	768.248	569.178	0	0	1793	29.8833
1808	1.5	29.9		0.291	1.5	0.302	1.5	0.239	0	0	0	0	0.4365	0.453	0.3585	0	0	707.665	768.701	569.537	0	0	1794	29.9
1809	1.5	29.9167		0.291	1.5	0.302	1.5	0.238	0	0	0	0	0.4365	0.453	0.357	0	0	708.102	769.154	569.894	0	0	1795	29.9167
1810	1.5	29.9333		0.291	1.5	0.301	1.5	0.238	0	0	0	0	0.4365	0.4515	0.357	0	0	708.538	769.605	570.251	0	0	1796	29.9333
1811	1.5	29.95		0.291	1.5	0.301	1.5	0.238	0	0	0	0	0.4365	0.4515	0.357	0	0	708.975	770.057	570.608	0	0	1797	29.95
1812	1.5	29.9667		0.291	1.5	0.301	1.5	0.238	0	0	0	0	0.4365	0.4515	0.357	0	0	709.411	770.508	570.965	0	0	1798	29.9667
1813	1.5	29.9833		0.291	1.5	0.301	1.5	0.238	0	0	0	0	0.4365	0.4515	0.357	0	0	709.848	770.96	571.322	0	0	1799	29.9833
1814	1.5	30		0.291	1.5	0.301	1.5	0.238	0	0	0	0	0.4365	0.4515	0.357	0	0	710.284	771.411	571.679	0	0	1800	30
1815	1.5	30.0167		0.291	1.5	0.301	1.5	0.237	0	0	0	0	0.4365	0.4515	0.3555	0	0	710.721	771.863	572.034	0	0	1801	30.0167
1816	1.5	30.0333		0.291	1.5	0.3	1.5	0.236	0	0	0	0	0.4365	0.45	0.354	0	0	711.157	772.313	572.388	0	0	1802	30.0333
1817	1.5	30.05		0.291	1.5	0.3	1.5	0.234	0	0	0	0	0.4365	0.45	0.351	0	0	711.594	772.763	572.739	0	0	1803	30.05
1818	1.5	30.0667		0.291	1.5	0.3	1.5	0.233	0	0	0	0	0.4365	0.45	0.3495	0	0	712.03	773.213	573.089	0	0	1804	30.0667
1819	1.5	30.0833		0.291	1.5	0.301	1.5	0.203	0	0	0	0	0.4365	0.4515	0.3045	0	0	712.467	773.664	573.393	0	0	1805	30.0833
1820	1.5	30.1		0.291	1.5	0.301	1.5	0.229	0	0	0	0	0.4365	0.4515	0.3435	0	0	712.903	774.116	573.737	0	0	1806	30.1
1821	1.5	30.1167		0.291	1.5	0.3	1.5	0.233	0	0	0	0	0.4365	0.45	0.3495	0	0	713.34	774.566	574.086	0	0	1807	30.1167
1822	1.5	30.1333		0.291	3.28	0.318	1.5	0.234	0	0	0	0	0.4365	1.04304	0.351	0	0	713.776	775.609	574.437	0	0	1808	30.1333
1823	1.5	30.15		0.291	1.5	0.313	1.5	0.234	0	0	0	0	0.4365	0.4695	0.351	0	0	714.213	776.078	574.788	0	0	1809	30.15
1824	1.5	30.1667		0.291	1.5	0.312	1.5	0.234	0	0	0	0	0.4365	0.468	0.351	0	0	714.649	776.546	575.139	0	0	1810	30.1667
1825	1.5	30.1833		0.299	1.5	0.311	1.5	0.234	0	0	0	0	0.4485	0.4665	0.351	0	0	715.098	777.013	575.49	0	0	1811	30.1833
1826	1.5	30.2		0.298	1.5	0.31	1.5	0.234	0	0	0	0	0.447	0.465	0.351	0	0	715.545	777.478	575.841	0	0	1812	30.2
1827	1.5	30.2167		0.297	1.5	0.309	1.5	0.234	0	0	0	0	0.4455	0.4635	0.351	0	0	715.99	777.941	576.192	0	0	1813	30.2167
1828	1.5	30.2333		0.296	1.5	0.308	1.5	0.234	0	0	0	0	0.444	0.462	0.351	0	0	716.434	778.403	576.543	0	0	1814	30.2333
1829	1.5	30.25		0.295	1.5	0.308	1.5	0.233	0	0	0	0	0.4425	0.462	0.3495	0	0	716.877	778.865	576.893	0	0	1815	30.25
1830	1.5	30.2667		0.294	1.5	0.308	1.5	0.233	0	0	0	0	0.441	0.462	0.3495	0	0	717.318	779.327	577.242	0	0	1816	30.2667
1831	1.5	30.2833		0.294	1.5	0.308	1.5	0.233	0	0	0	0	0.441	0.462	0.3495	0	0	717.759	779.789	577.592	0	0	1817	30.2833
1832	1.5	30.3		0.293	1.5	0.308	1.5	0.233	0	0	0	0	0.4395	0.462	0.3495	0	0	718.198	780.251	577.941	0	0	1818	30.3
1833	1.5	30.3167		0.293	1.5	0.307	1.5	0.233	0	0	0	0	0.4395	0.4605	0.3495	0	0	718.638	780.712	578.291	0	0	1819	30.3167
1834	1.5	30.3333		0.292	1.5	0.307	1.5	0.232	0	0	0	0	0.438	0.4605	0.348	0	0	719.076	781.172	578.639	0	0	1820	30.3333
1835	1.5	30.35		0.292	1.5	0.307	1.5	0.228	0	0	0	0	0.438	0.4605	0.342	0	0	719.514	781.633	578.981	0	0	1821	30.35
1836	1.5	30.3667		0.292	1.5	0.306	1.5	0.228	0	0	0	0	0.438	0.459	0.342	0	0	719.952	782.092	579.323	0	0	1822	30.3667
1837	1.5	30.3833		0.292	1.5	0.306	1.5	0.227	0	0	0	0	0.438	0.459	0.3405	0	0	720.39	782.551	579.663	0	0	1823	30.3833
1838	1.5	30.4		0.291	1.5	0.306	1.5	0.227	0	0	0	0	0.4365	0.459	0.3405	0	0	720.826	783.01	580.004	0	0	1824	30.4
1839	1.5	30.4167		0.291	1.5	0.306	1.5	0.227	0	0	0	0	0.4365	0.459	0.3405	0	0	721.263	783.469	580.344	0	0	1825	30.4167
1840	1.5	30.4333		0.291	1.5	0.305	1.5	0.227	0	0	0	0	0.4365	0.4575	0.3405	0	0	721.699	783.926	580.685	0	0	1826	30.4333
1841	1.5	30.45		0.291	1.5	0.305	1.5	0.228	0	0	0	0	0.4365	0.4575	0.342	0	0	722.136	784.384	581.027	0	0	1827	30.45
1842	1.5	30.4667		0.291	1.5	0.305	1.5	0.228	0	0	0	0	0.4365	0.4575	0.342	0	0	722.572	784.841	581.369	0	0	1828	30.4667
1843	1.5	30.4833		0.291	1.5	0.305	1.5	0.228	0	0	0	0	0.4365	0.4575	0.342	0	0	723.009	785.299	581.711	0	0	1829	30.4833
1844	1.5	30.5		0.291	1.5	0.306	1.5	0.228	0	0	0	0	0.4365	0.459	0.342	0	0	723.445	785.758	582.053	0	0	1830	30.5
1845	1.5	30.5167		0.291	1.5	0.306	1.5	0.228	0	0	0	0	0.4365	0.459	0.342	0	0	723.882	786.217	582.395	0	0	1831	30.5167
1846	1.5	30.5333		0.291	1.5	0.307	1.5	0.228	0	0	0	0	0.4365	0.4605	0.342	0	0	724.318	786.677	582.737	0	0	1832	30.5333
1847	1.5	30.55		0.291	1.5	0.307	1.5	0.228	0	0	0	0	0.4365	0.4605	0.342	0	0	724.755	787.138	583.079	0	0	1833	30.55
1848	1.5	30.5667		0.291	1.5	0.307	1.5	0.228	0	0	0	0	0.4365	0.4605	0.342	0	0	725.191	787.598	583.421	0	0	1834	30.5667
1849	1.5	30.5833		0.291	1.5	0.307	1.5	0.197	0	0	0	0	0.4365	0.4605	0.2955	0	0	725.628	788.059	583.716	0	0	1835	30.5833
1850	1.5	30.6		0.291	1.5	0.307	1.5	0.218	0	0	0	0	0.4365	0.4605	0.327	0	0	726.064	788.519	584.043	0	0	1836	30.6
1851	1.5	30.6167		0.291	1.5	0.307	1.5	0.226	0	0	0	0	0.4365	0.4605	0.339	0	0	726.501	788.98	584.382	0	0	1837	30.6167
1852	1.5	30.6333		0.291	1.5	1	1.5	0.227	0	0	0	0	0.4365	1.5	0.3405	0	0	726.937	790.48	584.723	0	0	1838	30.6333
1853	1.5	30.65		0.291	1.5	0.316	1.5	0.228	0	0	0	0	0.4365	0.474	0.342	0	0	727.374	790.954	585.065	0	0	1839	30.65
1854	1.5	30.6667		0.291	1.5	0.315	1.5	0.228	0	0	0	0	0.4365	0.4725	0.342	0	0	727.81	791.426	585.407	0	0	1840	30.6667
1855	1.5	30.6833		0.299	1.5	0.314	1.5	0.228	0	0	0	0	0.4485	0.471	0.342	0	0	728.259	791.897	585.749	0	0	1841	30.6833
1856	1.5	30.7		0.298	1.5	0.314	1.5	0.228	0	0	0	0	0.447	0.471	0.342	0	0	728.706	792.368	586.091	0	0	1842	30.7
1857	1.5	30.7167		0.297	1.5	0.313	1.5	0.228	0	0	0	0	0.4455	0.4695	0.342	0	0	729.151	792.838	586.433	0	0	1843	30.7167
1858	1.5	30.7333		0.296	1.5	0.312	1.5	0.228	0	0	0	0	0.444	0.468	0.342	0	0	729.595	793.306	586.775	0	0	1844	30.7333
1859	1.5	30.75		0.296	1.5	0.311	1.5	0.229	0	0	0	0	0.444	0.4665	0.3435	0	0	730.039	793.772	587.118	0	0	1845	30.75
1860	1.5	30.7667		0.294	1.5	0.311	1.5	0.228	0	0	0	0	0.441	0.4665	0.342	0	0	730.48	794.239	587.46	0	0	1846	30.7667
1861	1.5	30.7833		0.294	1.5	0.31	1.5	0.228	0	0	0	0	0.441	0.465	0.342	0	0	730.921	794.704	587.802	0	0	1847	30.7833
1862	1.5	30.8		0.294	1.5	0.31	1.5	0.228	0	0	0	0	0.441	0.465	0.342	0	0	731.362	795.169	588.144	0	0	1848	30.8
1863	1.5	30.8167		0.293	1.5	0.31	1.5	0.228	0	0	0	0	0.4395	0.465	0.342	0	0	731.802	795.634	588.486	0	0	1849	30.8167
1864	1.5	30.8333		0.292	1.5	0.31	1.5	0.228	0	0	0	0	0.438	0.465	0.342	0	0	732.24	796.099	588.828	0	0	1850	30.8333
1865	1.5	30.85		0.292	1.5	0.31	1.5	0.228	0	0	0	0	0.438	0.465	0.342	0	0	732.678	796.564	589.17	0	0	1851	30.85
1866	1.5	30.8667		0.292	1.5	0.31	1.5	0.227	0	0	0	0	0.438	0.465	0.3405	0	0	733.116	797.029	589.511	0	0	1852	30.8667
1867	1.5	30.8833		0.292	1.5	0.31	1.5	0.227	0	0	0	0	0.438	0.465	0.3405	0	0	733.554	797.494	589.851	0	0	1853	30.8833
1868	1.5	30.9		0.292	1.5	0.31	1.5	0.227	0	0	0	0	0.438	0.465	0.3405	0	0	733.992	797.959	590.192	0	0	1854	30.9
1869	1.5	30.9167		0.292	1.5	0.31	1.5	0.227	0	0	0	0	0.438	0.465	0.3405	0	0	734.43	798.424	590.532	0	0	1855	30.9167
1870	1.5	30.9333		0.291	1.5	0.309	1.5	0.227	0	0	0	0	0.4365	0.4635	0.3405	0	0	734.866	798.887	590.873	0	0	1856	30.9333
1871	1.5	30.95		0.291	1.5	0.309	1.5	0.227	0	0	0	0	0.4365	0.4635	0.3405	0	0	735.303	799.351	591.213	0	0	1857	30.95
1872	1.5	30.9667		0.291	1.5	0.309	1.5	0.227	0	0	0	0	0.4365	0.4635	0.3405	0	0	735.739	799.814	591.554	0	0	1858	30.9667
1873	1.5	30.9833		0.291	1.5	0.309	1.5	0.221	0	0	0	0	0.4365	0.4635	0.3315	0	0	736.176	800.278	591.885	0	0	1859	30.9833
1874	1.5	31		0.291	1.5	0.308	1.5	0.22	0	0	0	0	0.4365	0.462	0.33	0	0	736.612	800.74	592.215	0	0	1860	31
1875	1.5	31.0167		0.291	1.5	0.308	1.5	0.221	0	0	0	0	0.4365	0.462	0.3315	0	0	737.049	801.202	592.547	0	0	1861	31.0167
1876	1.5	31.0333		0.291	1.5	0.309	1.5	0.221	0	0	0	0	0.4365	0.4635	0.3315	0	0	737.485	801.665	592.878	0	0	1862	31.0333
1877	1.5	31.05		0.291	1.5	0.309	1.5	0.221	0	0	0	0	0.4365	0.4635	0.3315	0	0	737.922	802.129	593.21	0	0	1863	31.05
1878	1.5	31.0667		0.291	1.5	0.309	1.5	0.22	0	0	0	0	0.4365	0.4635	0.33	0	0	738.358	802.592	593.54	0	0	1864	31.0667
1879	1.5	31.0833		0.291	1.5	0.309	1.5	0.206	0	0	0	0	0.4365	0.4635	0.309	0	0	738.795	803.056	593.849	0	0	1865	31.0833
1880	1.5	31.1		0.291	1.5	0.309	1.5	0.221	0	0	0	0	0.4365	0.4635	0.3315	0	0	739.231	803.519	594.18	0	0	1866	31.1
1881	1.5	31.1167		0.291	1.5	0.308	1.5	0.227	0	0	0	0	0.4365	0.462	0.3405	0	0	739.668	803.981	594.521	0	0	1867	31.1167
1882	1.5	31.1333		0.291	3.35	0.321	1.5	0.228	0	0	0	0	0.4365	1.07535	0.342	0	0	740.104	805.057	594.863	0	0	1868	31.1333
1883	1.5	31.15		0.291	1.5	0.316	1.5	0.228	0	0	0	0	0.4365	0.474	0.342	0	0	740.541	805.531	595.205	0	0	1869	31.15
1884	1.5	31.1667		0.291	1.5	0.315	1.5	0.228	0	0	0	0	0.4365	0.4725	0.342	0	0	740.977	806.003	595.547	0	0	1870	31.1667
1885	1.5	31.1833		0.298	1.5	0.314	1.5	0.229	0	0	0	0	0.447	0.471	0.3435	0	0	741.424	806.474	595.89	0	0	1871	31.1833
1886	1.5	31.2		0.297	1.5	0.313	1.5	0.229	0	0	0	0	0.4455	0.4695	0.3435	0	0	741.87	806.944	596.234	0	0	1872	31.2
1887	1.5	31.2167		0.297	1.5	0.313	1.5	0.229	0	0	0	0	0.4455	0.4695	0.3435	0	0	742.315	807.413	596.577	0	0	1873	31.2167
1888	1.5	31.2333		0.296	1.5	0.311	1.5	0.229	0	0	0	0	0.444	0.4665	0.3435	0	0	742.759	807.88	596.921	0	0	1874	31.2333
1889	1.5	31.25		0.296	1.5	0.311	1.5	0.229	0	0	0	0	0.444	0.4665	0.3435	0	0	743.203	808.346	597.264	0	0	1875	31.25
1890	1.5	31.2667		0.295	1.5	0.311	1.5	0.229	0	0	0	0	0.4425	0.4665	0.3435	0	0	743.646	808.813	597.608	0	0	1876	31.2667
1891	1.5	31.2833		0.295	1.5	0.31	1.5	0.229	0	0	0	0	0.4425	0.465	0.3435	0	0	744.088	809.278	597.951	0	0	1877	31.2833
1892	1.5	31.3		0.294	1.5	0.31	1.5	0.23	0	0	0	0	0.441	0.465	0.345	0	0	744.529	809.743	598.296	0	0	1878	31.3
1893	1.5	31.3167		0.294	1.5	0.311	1.5	0.23	0	0	0	0	0.441	0.4665	0.345	0	0	744.97	810.209	598.641	0	0	1879	31.3167
1894	1.5	31.3333		0.293	1.5	0.31	1.5	0.23	0	0	0	0	0.4395	0.465	0.345	0	0	745.41	810.674	598.986	0	0	1880	31.3333
1895	1.5	31.35		0.293	1.5	0.31	1.5	0.23	0	0	0	0	0.4395	0.465	0.345	0	0	745.849	811.139	599.331	0	0	1881	31.35
1896	1.5	31.3667		0.293	1.5	0.31	1.5	0.23	0	0	0	0	0.4395	0.465	0.345	0	0	746.289	811.604	599.676	0	0	1882	31.3667
1897	1.5	31.3833		0.293	1.5	0.31	1.5	0.23	0	0	0	0	0.4395	0.465	0.345	0	0	746.728	812.069	600.021	0	0	1883	31.3833
1898	1.5	31.4		0.292	1.5	0.309	1.5	0.23	0	0	0	0	0.438	0.4635	0.345	0	0	747.166	812.533	600.366	0	0	1884	31.4
1899	1.5	31.4167		0.292	1.5	0.309	1.5	0.23	0	0	0	0	0.438	0.4635	0.345	0	0	747.604	812.996	600.711	0	0	1885	31.4167
1900	1.5	31.4333		0.292	1.5	0.308	1.5	0.23	0	0	0	0	0.438	0.462	0.345	0	0	748.042	813.458	601.056	0	0	1886	31.4333
1901	1.5	31.45		0.292	1.5	0.308	1.5	0.23	0	0	0	0	0.438	0.462	0.345	0	0	748.48	813.92	601.401	0	0	1887	31.45
1902	1.5	31.4667		0.292	1.5	0.308	1.5	0.23	0	0	0	0	0.438	0.462	0.345	0	0	748.918	814.382	601.746	0	0	1888	31.4667
1903	1.5	31.4833		0.292	1.5	0.307	1.5	0.23	0	0	0	0	0.438	0.4605	0.345	0	0	749.356	814.843	602.091	0	0	1889	31.4833
1904	1.5	31.5		0.292	1.5	0.307	1.5	0.23	0	0	0	0	0.438	0.4605	0.345	0	0	749.794	815.303	602.436	0	0	1890	31.5
1905	1.5	31.5167		0.292	1.5	0.307	1.5	0.23	0	0	0	0	0.438	0.4605	0.345	0	0	750.232	815.764	602.781	0	0	1891	31.5167
1906	1.5	31.5333		0.292	1.5	0.307	1.5	0.23	0	0	0	0	0.438	0.4605	0.345	0	0	750.67	816.224	603.126	0	0	1892	31.5333
1907	1.5	31.55		0.292	1.5	0.307	1.5	0.23	0	0	0	0	0.438	0.4605	0.345	0	0	751.108	816.685	603.471	0	0	1893	31.55
1908	1.5	31.5667		0.292	1.5	0.307	1.5	0.23	0	0	0	0	0.438	0.4605	0.345	0	0	751.546	817.145	603.816	0	0	1894	31.5667
1909	1.5	31.5833		0.293	1.5	0.307	1.5	0.2	0	0	0	0	0.4395	0.4605	0.3	0	0	751.986	817.606	604.116	0	0	1895	31.5833
1910	1.5	31.6		0.292	1.5	0.307	1.5	0.223	0	0	0	0	0.438	0.4605	0.3345	0	0	752.424	818.066	604.451	0	0	1896	31.6
1911	1.5	31.6167		0.292	1.5	0.307	1.5	0.229	0	0	0	0	0.438	0.4605	0.3435	0	0	752.862	818.527	604.794	0	0	1897	31.6167
1912	1.5	31.6333		0.292	1.5	1	1.5	0.231	0	0	0	0	0.438	1.5	0.3465	0	0	753.3	820.027	605.141	0	0	1898	31.6333
1913	1.5	31.65		0.292	1.5	0.319	1.5	0.232	0	0	0	0	0.438	0.4785	0.348	0	0	753.738	820.505	605.489	0	0	1899	31.65
1914	1.5	31.6667		0.292	1.5	0.318	1.5	0.233	0	0	0	0	0.438	0.477	0.3495	0	0	754.176	820.982	605.838	0	0	1900	31.6667
1915	1.5	31.6833		0.3	1.5	0.317	1.5	0.233	0	0	0	0	0.45	0.4755	0.3495	0	0	754.626	821.458	606.188	0	0	1901	31.6833
1916	1.5	31.7		0.299	1.5	0.317	1.5	0.233	0	0	0	0	0.4485	0.4755	0.3495	0	0	755.074	821.933	606.537	0	0	1902	31.7
1917	1.5	31.7167		0.299	1.5	0.316	1.5	0.233	0	0	0	0	0.4485	0.474	0.3495	0	0	755.523	822.407	606.887	0	0	1903	31.7167
1918	1.5	31.7333		0.298	1.5	0.315	1.5	0.233	0	0	0	0	0.447	0.4725	0.3495	0	0	755.97	822.88	607.236	0	0	1904	31.7333
1919	1.5	31.75		0.297	1.5	0.315	1.5	0.233	0	0	0	0	0.4455	0.4725	0.3495	0	0	756.415	823.352	607.586	0	0	1905	31.75
1920	1.5	31.7667		0.297	1.5	0.314	1.5	0.233	0	0	0	0	0.4455	0.471	0.3495	0	0	756.861	823.823	607.935	0	0	1906	31.7667
1921	1.5	31.7833		0.297	1.5	0.314	1.5	0.233	0	0	0	0	0.4455	0.471	0.3495	0	0	757.306	824.294	608.285	0	0	1907	31.7833
1922	1.5	31.8		0.296	1.5	0.314	1.5	0.234	0	0	0	0	0.444	0.471	0.351	0	0	757.75	824.765	608.636	0	0	1908	31.8
1923	1.5	31.8167		0.296	1.5	0.313	1.5	0.234	0	0	0	0	0.444	0.4695	0.351	0	0	758.194	825.235	608.987	0	0	1909	31.8167
1924	1.5	31.8333		0.296	1.5	0.313	1.5	0.234	0	0	0	0	0.444	0.4695	0.351	0	0	758.638	825.704	609.338	0	0	1910	31.8333
1925	1.5	31.85		0.296	1.5	0.313	1.5	0.234	0	0	0	0	0.444	0.4695	0.351	0	0	759.082	826.174	609.689	0	0	1911	31.85
1926	1.5	31.8667		0.295	1.5	0.312	1.5	0.234	0	0	0	0	0.4425	0.468	0.351	0	0	759.525	826.642	610.04	0	0	1912	31.8667
1927	1.5	31.8833		0.295	1.5	0.313	1.5	0.233	0	0	0	0	0.4425	0.4695	0.3495	0	0	759.967	827.111	610.389	0	0	1913	31.8833
1928	1.5	31.9		0.295	1.5	0.312	1.5	0.232	0	0	0	0	0.4425	0.468	0.348	0	0	760.41	827.579	610.737	0	0	1914	31.9
1929	1.5	31.9167		0.295	1.5	0.312	1.5	0.231	0	0	0	0	0.4425	0.468	0.3465	0	0	760.852	828.047	611.084	0	0	1915	31.9167
1930	1.5	31.9333		0.295	1.5	0.313	1.5	0.231	0	0	0	0	0.4425	0.4695	0.3465	0	0	761.295	828.517	611.43	0	0	1916	31.9333
1931	1.5	31.95		0.295	1.5	0.313	1.5	0.231	0	0	0	0	0.4425	0.4695	0.3465	0	0	761.737	828.986	611.777	0	0	1917	31.95
1932	1.5	31.9667		0.295	1.5	0.313	1.5	0.23	0	0	0	0	0.4425	0.4695	0.345	0	0	762.18	829.456	612.122	0	0	1918	31.9667
1933	1.5	31.9833		0.295	1.5	0.313	1.5	0.23	0	0	0	0	0.4425	0.4695	0.345	0	0	762.622	829.925	612.467	0	0	1919	31.9833
1934	1.5	32		0.295	1.5	0.313	1.5	0.231	0	0	0	0	0.4425	0.4695	0.3465	0	0	763.065	830.395	612.813	0	0	1920	32
1935	1.5	32.0167		0.295	1.5	0.314	1.5	0.23	0	0	0	0	0.4425	0.471	0.345	0	0	763.507	830.866	613.158	0	0	1921	32.0167
1936	1.5	32.0333		0.295	1.5	0.314	1.5	0.23	0	0	0	0	0.4425	0.471	0.345	0	0	763.95	831.337	613.503	0	0	1922	32.0333
